# Supplementary material for: An Environmental Escherichia coli Strain Is Naturally Competent to Acquire Exogenous DNA
Source: Front Microbiol. 2020 Sep 3;11:574301. doi: 10.3389/fmicb.2020.574301 (PMC7494812; doi:10.3389/fmicb.2020.574301)
Supplement: Supplementary file 3 [file Table_7.xlsx]

## Sheet: Genomic Islands ED1
Supplementary Table 7 (see caption on Supplementary Material file)
Island start	Island end	Length	Gene name	Locus	Gene start	Gene end	Strand	Product
55514	61938	6424	NLS31399.1	HBA78_10340	55514	56473	-1	fimbrial family protein
			NLS31398.1	HBA78_10335	56486	58936	-1	fimbrial biogenesis outer membrane usher protein
			NLS31397.1	HBA78_10330	58949	59632	-1	fimbria/pilus periplasmic chaperone
			NLS31396.1	HBA78_10325	59682	60215	-1	fimbrial protein
			NLS31395.1	HBA78_10320	60517	61938	-1	type III secretion system effector EspX1
270548	276708	6160	NLS31210.1	HBA78_09390	270548	271303	-1	hydroxyacylglutathione hydrolase
			NLS31209.1	HBA78_09385	271337	272059	1	class I SAM-dependent methyltransferase
			NLS31208.1	HBA78_09380	272056	272523	-1	ribonuclease HI
			NLS31207.1	HBA78_09375	272588	273319	1	DNA polymerase III subunit epsilon
			NLS31206.1	HBA78_09365	273858	274643	1	hypothetical protein
				HBA78_09360	274792	275258	-1	hypothetical protein
			NLS31205.1	HBA78_09355	275268	276182	-1	hypothetical protein
			NLS31204.1	HBA78_09350	276226	276708	-1	Hcp family type VI secretion system effector
300051	306372	6321		HBA78_09260	300051	301269	1	RHS repeat protein
				HBA78_09255	301528	302834	1	RHS repeat protein
			NLS31186.1	HBA78_09250	302896	304308	1	RHS repeat protein
			NLS31185.1	HBA78_09245	304308	304685	1	hypothetical protein
			NLS31184.1	HBA78_09240	304906	306042	1	ISAs1 family transposase
				HBA78_09235	306061	306372	1	transposase
363081	367456	4375		HBA78_08905	363081	363239	-1	integrase
				HBA78_08900	363331	363433	-1	transcriptional regulator
			NLS31119.1	HBA78_08895	363430	363900	-1	hypothetical protein
			NLS31118.1	HBA78_08890	363946	364086	-1	ash family protein
			NLS31117.1	HBA78_08885	364247	367456	-1	RNA-directed DNA polymerase
386117	392392	6275	NLS31101.1	HBA78_08805	386117	386659	-1	ECP biosynthesis operon DNA-binding transcriptional regulator EcpR
				HBA78_08800	387483	387673	1	hypothetical protein
			NLS31100.1	HBA78_08795	387743	387883	-1	50S ribosomal protein L36
			NLS31099.1	HBA78_08790	387883	388146	-1	type B 50S ribosomal protein L31
			NLS31098.1	HBA78_08785	388498	388599	-1	hypothetical protein
			NLS31097.1	HBA78_08780	389073	390215	-1	NADH-dependent flavin oxidoreductase
			NLS31096.1	HBA78_08775	390389	391309	-1	alpha/beta hydrolase
			NLS31095.1	HBA78_08770	391466	392392	1	LysR family transcriptional regulator
400323	405813	5490	NLS31090.1	HBA78_08745	400323	401180	-1	helix-turn-helix domain-containing protein
			NLS31089.1	HBA78_08740	401428	402297	1	aldo/keto reductase
			NLS31088.1	HBA78_08735	402457	403050	-1	reactive chlorine species resistance protein RclC
			NLS31087.1	HBA78_08730	403062	403298	-1	DUF1471 domain-containing protein
			NLS31086.1	HBA78_08725	403407	404732	-1	pyridine nucleotide-disulfide oxidoreductase
			NLS31085.1	HBA78_08720	404959	405813	1	DNA-binding transcriptional regulator RclR
906246	921866	15620	NLS33842.1	HBA78_23035	906246	907316	-1	tyrosine-type recombinase/integrase
			NLS33843.1	HBA78_23040	907294	907512	-1	excisionase
			NLS33844.1	HBA78_23045	907603	907902	-1	hypothetical protein
			NLS33845.1	HBA78_23050	908060	908338	-1	DUF4752 family protein
			NLS33846.1	HBA78_23055	908338	909027	-1	DUF550 domain-containing protein
			NLS33847.1	HBA78_23060	909024	909395	-1	ead/Ea22-like family protein
			NLS33848.1	HBA78_23065	909392	909613	-1	TraR/DksA family transcriptional regulator
			NLS33849.1	HBA78_23070	909712	909993	-1	hypothetical protein
			NLS33850.1	HBA78_23075	910004	910195	-1	DUF1382 family protein
			NLS33851.1	HBA78_23080	910168	910350	-1	DUF1317 domain-containing protein
			NLS33852.1	HBA78_23085	910347	911027	-1	YqaJ viral recombinase family protein
			NLS33853.1	HBA78_23090	911024	911809	-1	phage recombination protein Bet
			NLS33854.1	HBA78_23095	911815	912111	-1	host-nuclease inhibitor protein Gam
			NLS33855.1	HBA78_23100	912186	912329	-1	host cell division inhibitory peptide Kil
			NLS33856.1	HBA78_23105	912298	912462	-1	protease FtsH-inhibitory lysogeny factor CIII
			NLS33857.1	HBA78_23110	912535	912903	-1	DUF2528 family protein
			NLS33858.1	HBA78_23115	913056	913382	-1	hypothetical protein
			NLS33859.1	HBA78_23120	913430	913900	-1	hypothetical protein
			NLS33860.1	HBA78_23125	913955	914092	-1	hypothetical protein
			NLS33861.1	HBA78_23130	914101	914469	-1	antitermination protein
			NLS33862.1	HBA78_23135	914954	915859	-1	hypothetical protein
			NLS33863.1	HBA78_23140	915946	916659	-1	LexA family transcriptional regulator
			NLS33864.1	HBA78_23145	916760	916960	1	hypothetical protein
			NLS33865.1	HBA78_23150	917079	917357	1	hypothetical protein
			NLS33866.1	HBA78_23155	917392	917553	1	hypothetical protein
			NLS33867.1	HBA78_23160	917540	918361	1	replication protein
			NLS33868.1	HBA78_23165	918358	919734	1	AAA family ATPase
			NLS33869.1	HBA78_23170	919808	920248	1	recombination protein NinB
			NLS33870.1	HBA78_23175	920245	920427	1	NinE family protein
			NLS33871.1	HBA78_23180	920424	920594	1	protein ninF
			NLS33872.1	HBA78_23185	920587	921198	1	recombination protein NinG
			NLS33873.1	HBA78_23190	921195	921866	1	serine/threonine protein phosphatase
			NLS33874.1	HBA78_23195	921857	922345	1	antiterminator
			NLS33842.1	HBA78_23035	906246	907316	-1	tyrosine-type recombinase/integrase
			NLS33843.1	HBA78_23040	907294	907512	-1	excisionase
			NLS33844.1	HBA78_23045	907603	907902	-1	hypothetical protein
			NLS33845.1	HBA78_23050	908060	908338	-1	DUF4752 family protein
			NLS33846.1	HBA78_23055	908338	909027	-1	DUF550 domain-containing protein
			NLS33847.1	HBA78_23060	909024	909395	-1	ead/Ea22-like family protein
			NLS33848.1	HBA78_23065	909392	909613	-1	TraR/DksA family transcriptional regulator
			NLS33849.1	HBA78_23070	909712	909993	-1	hypothetical protein
			NLS33850.1	HBA78_23075	910004	910195	-1	DUF1382 family protein
			NLS33851.1	HBA78_23080	910168	910350	-1	DUF1317 domain-containing protein
			NLS33852.1	HBA78_23085	910347	911027	-1	YqaJ viral recombinase family protein
			NLS33855.1	HBA78_23100	912186	912329	-1	host cell division inhibitory peptide Kil
			NLS33856.1	HBA78_23105	912298	912462	-1	protease FtsH-inhibitory lysogeny factor CIII
			NLS33857.1	HBA78_23110	912535	912903	-1	DUF2528 family protein
			NLS33858.1	HBA78_23115	913056	913382	-1	hypothetical protein
			NLS33859.1	HBA78_23120	913430	913900	-1	hypothetical protein
			NLS33860.1	HBA78_23125	913955	914092	-1	hypothetical protein
			NLS33861.1	HBA78_23130	914101	914469	-1	antitermination protein
			NLS33862.1	HBA78_23135	914954	915859	-1	hypothetical protein
			NLS33863.1	HBA78_23140	915946	916659	-1	LexA family transcriptional regulator
			NLS33864.1	HBA78_23145	916760	916960	1	hypothetical protein
			NLS33865.1	HBA78_23150	917079	917357	1	hypothetical protein
			NLS33866.1	HBA78_23155	917392	917553	1	hypothetical protein
			NLS33867.1	HBA78_23160	917540	918361	1	replication protein
			NLS33868.1	HBA78_23165	918358	919734	1	AAA family ATPase
			NLS33869.1	HBA78_23170	919808	920248	1	recombination protein NinB
			NLS33870.1	HBA78_23175	920245	920427	1	NinE family protein
			NLS33871.1	HBA78_23180	920424	920594	1	protein ninF
			NLS33872.1	HBA78_23185	920587	921198	1	recombination protein NinG
			NLS33873.1	HBA78_23190	921195	921866	1	serine/threonine protein phosphatase
			NLS33874.1	HBA78_23195	921857	922345	1	antiterminator
			NLS33875.1	HBA78_23210	922835	923158	1	phage holin, lambda family
			NLS33876.1	HBA78_23215	923142	923618	1	glycoside hydrolase family protein
			NLS33877.1	HBA78_23220	923602	923994	1	DUF2570 domain-containing protein
			NLS33878.1	HBA78_23225	924197	924706	1	hypothetical protein
934554	950922	16368	NLS29894.1	HBA78_02630	934554	934823	1	phage tail assembly protein
			NLS29895.1	HBA78_02635	934965	936800	1	phage tail tape measure protein
			NLS29896.1	HBA78_02640	936861	938189	1	DNA circularization protein
			NLS29897.1	HBA78_02645	938186	939265	1	baseplate protein
			NLS29898.1	HBA78_02650	939265	939813	1	phage baseplate assembly protein
			NLS29899.1	HBA78_02655	939813	940238	1	phage tail protein
			NLS29900.1	HBA78_02660	940225	941283	1	baseplate J/gp47 family protein
			NLS29901.1	HBA78_02665	941274	941858	1	YmfQ family protein
			NLS29902.1	HBA78_02670	941862	942812	1	carbohydrate kinase
			NLS29903.1	HBA78_02675	942812	943207	1	tail fiber assembly protein
			NLS29904.1	HBA78_02680	943249	944274	-1	acyltransferase
				HBA78_02685	944470	944574	1	DNA-invertase
			NLS29905.1	HBA78_02690	944667	946004	1	hypothetical protein
			NLS29906.1	HBA78_02695	946042	947187	-1	acyltransferase
				HBA78_02700	947573	947656	-1	integrase
			NLS29907.1	HBA78_02705	947971	948447	-1	kinase inhibitor
			NLS29908.1	HBA78_02710	948506	949795	-1	adenosylmethionine--8-amino-7-oxononanoate transaminase
			NLS29909.1	HBA78_02715	949882	950922	1	biotin synthase BioB
			NLS29910.1	HBA78_02720	950919	952073	1	8-amino-7-oxononanoate synthase
942812	947656	4844	NLS29903.1	HBA78_02675	942812	943207	1	tail fiber assembly protein
			NLS29904.1	HBA78_02680	943249	944274	-1	acyltransferase
				HBA78_02685	944470	944574	1	DNA-invertase
			NLS29905.1	HBA78_02690	944667	946004	1	hypothetical protein
			NLS29906.1	HBA78_02695	946042	947187	-1	acyltransferase
				HBA78_02700	947573	947656	-1	integrase
1225867	1232278	6411	NLS30155.1	HBA78_03965	1224549	1225874	-1	poly-beta-1,6 N-acetyl-D-glucosamine synthase
			NLS30156.1	HBA78_03970	1225867	1227885	-1	poly-beta-1,6-N-acetyl-D-glucosamine N-deacetylase PgaB
			NLS30157.1	HBA78_03975	1227894	1230317	-1	poly-beta-1,6 N-acetyl-D-glucosamine export porin PgaA
			NLS30158.1	HBA78_03980	1230911	1232278	1	GGDEF domain-containing protein
1334680	1346420	11740	NLS34182.1	HBA78_24855	1334680	1335003	-1	anti-adapter protein IraM
			NLS33627.1	HBA78_21900	1336692	1336802	-1	hypothetical protein
			NLS33626.1	HBA78_21895	1336855	1337259	-1	DUF1398 domain-containing protein
			NLS33625.1	HBA78_21890	1337480	1338211	-1	DNA-binding transcriptional repressor BluR
			NLS33624.1	HBA78_21885	1338416	1339627	-1	blue light-responsive regulator BluF
			NLS33623.1	HBA78_21880	1339941	1340177	1	two-component-system connector protein YcgZ
			NLS33622.1	HBA78_21875	1340220	1340492	1	two-component-system connector protein YmgA
			NLS33621.1	HBA78_21870	1340521	1340787	1	biofilm/acid-resistance regulator AriR
			NLS33620.1	HBA78_21865	1340900	1341148	1	hypothetical protein
			NLS33619.1	HBA78_21860	1341484	1343007	1	EAL domain-containing protein
			NLS33618.1	HBA78_21855	1343139	1343357	1	hypothetical protein
			NLS33617.1	HBA78_21850	1343757	1346420	1	autotransporter outer membrane beta-barrel domain-containing protein
1504636	1511896	7260	NLS31789.1	HBA78_12370	1504636	1506123	1	aldehyde dehydrogenase PuuC
			NLS31790.1	HBA78_12375	1506125	1507405	1	gamma-glutamylputrescine oxidase
			NLS31791.1	HBA78_12380	1507443	1508708	1	4-aminobutyrate transaminase
			NLS31792.1	HBA78_12385	1508828	1509805	-1	phage shock protein operon transcriptional activator
			NLS31793.1	HBA78_12390	1509972	1510640	1	phage shock protein PspA
			NLS31794.1	HBA78_12395	1510694	1510918	1	envelope stress response membrane protein PspB
			NLS31795.1	HBA78_12400	1510918	1511277	1	envelope stress response membrane protein PspC
			NLS31796.1	HBA78_12405	1511286	1511507	1	phage shock protein PspD
			NLS31797.1	HBA78_12410	1511582	1511896	1	thiosulfate sulfurtransferase PspE
1544090	1597443	53353	NLS31827.1	HBA78_12560	1544090	1544305	-1	excisionase XisR
			NLS31828.1	HBA78_12565	1544405	1544593	-1	DUF1187 family protein
			NLS31829.1	HBA78_12570	1544586	1544780	-1	type I toxin-antitoxin system endodeoxyribonuclease toxin RalR
			NLS31830.1	HBA78_12575	1544837	1545670	-1	recombination protein RecT
			NLS31831.1	HBA78_12580	1545663	1548263	-1	exodeoxyribonuclease VIII
			NLS31832.1	HBA78_12585	1548365	1548640	-1	hypothetical protein
			NLS31833.1	HBA78_12590	1548715	1548891	-1	hypothetical protein
			NLS31834.1	HBA78_12595	1548885	1549106	-1	killing protein KilR
				HBA78_12600	1549537	1550022	1	superinfection exclusion protein B
				HBA78_12605	1550025	1550177	-1	YdaF family protein
			NLS31835.1	HBA78_12610	1550612	1551031	-1	helix-turn-helix domain-containing protein
			NLS31836.1	HBA78_12615	1551111	1551365	1	helix-turn-helix domain-containing protein
			NLS31837.1	HBA78_12620	1551362	1551784	1	hypothetical protein
			NLS31838.1	HBA78_12625	1551797	1552996	1	DUF1376 domain-containing protein
			NLS31839.1	HBA78_12630	1553003	1553737	1	ATP-binding protein
			NLS31840.1	HBA78_12635	1553876	1554979	1	AAA family ATPase
			NLS31841.1	HBA78_12640	1554982	1557249	1	S8 family serine peptidase
			NLS31842.1	HBA78_12645	1557777	1558376	1	DUF1367 family protein
			NLS31843.1	HBA78_12650	1558376	1558666	1	DUF1364 domain-containing protein
			NLS31844.1	HBA78_12655	1558663	1559199	1	DUF1133 family protein
			NLS31845.1	HBA78_12670	1560487	1560702	1	phage lysis protein EssD
			NLS31846.1	HBA78_12675	1560702	1561199	1	lysozyme RrrD
			NLS31847.1	HBA78_12680	1561416	1561601	1	hypothetical protein
			NLS31848.1	HBA78_12685	1561798	1563255	1	potassium transporter TrkG
			NLS31849.1	HBA78_12690	1563393	1564184	1	ParB N-terminal domain-containing protein
			NLS31850.1	HBA78_12695	1564177	1565109	1	hypothetical protein
			NLS31851.1	HBA78_12700	1565087	1565296	1	hypothetical protein
			NLS31852.1	HBA78_12705	1565300	1566394	1	terminase small subunit
			NLS31853.1	HBA78_12710	1566375	1567676	1	terminase
			NLS31854.1	HBA78_12715	1567679	1569085	1	DUF4055 domain-containing protein
			NLS31855.1	HBA78_12720	1569069	1570181	1	hypothetical protein
			NLS31856.1	HBA78_12725	1570286	1571050	1	hypothetical protein
			NLS31857.1	HBA78_12730	1571149	1572288	1	P22 coat - protein 5 family protein
			NLS31858.1	HBA78_12735	1572331	1572507	1	hypothetical protein
			NLS31859.1	HBA78_12740	1572511	1572906	1	protein singed
			NLS31860.1	HBA78_12745	1572906	1573289	1	glutamate 5-kinase
			NLS31861.1	HBA78_12750	1573290	1573670	1	HK97 gp10 family phage protein
			NLS31862.1	HBA78_12755	1573667	1574059	1	electron transfer flavoprotein subunit beta
			NLS31863.1	HBA78_12760	1574086	1575048	1	hypothetical protein
			NLS31864.1	HBA78_12765	1575199	1575558	1	hypothetical protein
			NLS31865.1	HBA78_12770	1576030	1579263	1	phage tail tape measure protein
			NLS31866.1	HBA78_12775	1579256	1579594	1	phage tail protein
			NLS31867.1	HBA78_12780	1579594	1580292	1	phage minor tail protein L
			NLS31868.1	HBA78_12785	1580298	1581041	1	phage tail protein
			NLS31869.1	HBA78_12790	1580939	1581586	1	tail assembly protein
			NLS31870.1	HBA78_12795	1581646	1585041	1	host specificity protein J
			NLS31871.1	HBA78_12800	1585109	1585708	1	Ail/Lom family outer membrane beta-barrel protein
			NLS31872.1	HBA78_12805	1585773	1588145	1	phage tail protein
			NLS31873.1	HBA78_12810	1588145	1588426	1	hypothetical protein
			NLS31874.1	HBA78_12815	1588436	1589140	1	tail fiber domain-containing protein
			NLS31875.1	HBA78_12820	1589151	1589441	1	hypothetical protein
			NLS31876.1	HBA78_12825	1589950	1590663	1	cytolethal distending toxin type IV subunit CdtA
			NLS31877.1	HBA78_12830	1590660	1591481	1	cytolethal distending toxin type IV nuclease subunit CdtB
			NLS31878.1	HBA78_12835	1591478	1592050	1	cytolethal distending toxin type IV subunit CdtC
			NLS31879.1	HBA78_12840	1592120	1593604	-1	alpha/beta hydrolase
			NLS31880.1	HBA78_12845	1593789	1594739	-1	omptin family outer membrane protease
			NLS31881.1	HBA78_12850	1595735	1596169	-1	universal stress protein UspF
			NLS31882.1	HBA78_12855	1596310	1597443	-1	porin OmpN
1548365	1552996	4631	NLS31832.1	HBA78_12585	1548365	1548640	-1	hypothetical protein
			NLS31833.1	HBA78_12590	1548715	1548891	-1	hypothetical protein
			NLS31834.1	HBA78_12595	1548885	1549106	-1	killing protein KilR
				HBA78_12600	1549537	1550022	1	superinfection exclusion protein B
				HBA78_12605	1550025	1550177	-1	YdaF family protein
			NLS31835.1	HBA78_12610	1550612	1551031	-1	helix-turn-helix domain-containing protein
			NLS31836.1	HBA78_12615	1551111	1551365	1	helix-turn-helix domain-containing protein
			NLS31837.1	HBA78_12620	1551362	1551784	1	hypothetical protein
			NLS31838.1	HBA78_12625	1551797	1552996	1	DUF1376 domain-containing protein
1558376	1563255	4879	NLS31843.1	HBA78_12650	1558376	1558666	1	DUF1364 domain-containing protein
			NLS31844.1	HBA78_12655	1558663	1559199	1	DUF1133 family protein
			NLS31845.1	HBA78_12670	1560487	1560702	1	phage lysis protein EssD
			NLS31846.1	HBA78_12675	1560702	1561199	1	lysozyme RrrD
			NLS31847.1	HBA78_12680	1561416	1561601	1	hypothetical protein
			NLS31848.1	HBA78_12685	1561798	1563255	1	potassium transporter TrkG
1572331	1581041	8710	NLS31858.1	HBA78_12735	1572331	1572507	1	hypothetical protein
			NLS31859.1	HBA78_12740	1572511	1572906	1	protein singed
			NLS31860.1	HBA78_12745	1572906	1573289	1	glutamate 5-kinase
			NLS31861.1	HBA78_12750	1573290	1573670	1	HK97 gp10 family phage protein
			NLS31862.1	HBA78_12755	1573667	1574059	1	electron transfer flavoprotein subunit beta
			NLS31863.1	HBA78_12760	1574086	1575048	1	hypothetical protein
			NLS31864.1	HBA78_12765	1575199	1575558	1	hypothetical protein
			NLS31865.1	HBA78_12770	1576030	1579263	1	phage tail tape measure protein
			NLS31866.1	HBA78_12775	1579256	1579594	1	phage tail protein
			NLS31867.1	HBA78_12780	1579594	1580292	1	phage minor tail protein L
			NLS31868.1	HBA78_12785	1580298	1581041	1	phage tail protein
			NLS31869.1	HBA78_12790	1580939	1581586	1	tail assembly protein
1588145	1594739	6594	NLS31873.1	HBA78_12810	1588145	1588426	1	hypothetical protein
			NLS31874.1	HBA78_12815	1588436	1589140	1	tail fiber domain-containing protein
			NLS31875.1	HBA78_12820	1589151	1589441	1	hypothetical protein
			NLS31876.1	HBA78_12825	1589950	1590663	1	cytolethal distending toxin type IV subunit CdtA
			NLS31877.1	HBA78_12830	1590660	1591481	1	cytolethal distending toxin type IV nuclease subunit CdtB
			NLS31878.1	HBA78_12835	1591478	1592050	1	cytolethal distending toxin type IV subunit CdtC
			NLS31879.1	HBA78_12840	1592120	1593604	-1	alpha/beta hydrolase
			NLS31880.1	HBA78_12845	1593789	1594739	-1	omptin family outer membrane protease
1682142	1689095	6953	NLS29880.1	HBA78_02550	1682142	1686353	1	RHS repeat protein
			NLS29879.1	HBA78_02545	1686350	1686835	1	pentapeptide repeat-containing protein
				HBA78_02540	1687421	1687941	1	ISAs1 family transposase
			NLS29878.1	HBA78_02535	1688046	1689095	-1	diguanylate cyclase
1740501	1744916	4415	NLS29839.1	HBA78_02340	1740501	1740623	1	hypothetical protein
			NLS29838.1	HBA78_02335	1740589	1741746	-1	anaerobic sulfatase maturase
			NLS29837.1	HBA78_02330	1741798	1743480	-1	sulfatase-like hydrolase/transferase
			NLS29836.1	HBA78_02325	1743883	1744644	-1	acid stress response transcriptional regulator YdeO
			NLS29835.1	HBA78_02320	1744719	1744916	-1	two-component system connector SafA
1747776	1756771	8995	NLS29833.1	HBA78_02310	1747776	1748690	-1	fimbrial protein
			NLS29832.1	HBA78_02305	1748750	1749253	-1	type 1 fimbrial protein
			NLS29831.1	HBA78_02300	1749266	1749796	-1	type 1 fimbrial protein
			NLS29830.1	HBA78_02295	1749810	1752461	-1	fimbrial biogenesis outer membrane usher protein
			NLS29829.1	HBA78_02290	1752503	1753213	-1	fimbria/pilus periplasmic chaperone
			NLS29828.1	HBA78_02285	1753576	1754139	-1	fimbrial protein
				HBA78_02280	1754573	1754839	-1	helix-turn-helix transcriptional regulator
			NLS29827.1	HBA78_02275	1755242	1756045	-1	4-carboxymuconolactone decarboxylase
			NLS29826.1	HBA78_02270	1756061	1756771	-1	antibiotic biosynthesis monooxygenase
2207544	2226615	19071	NLS32533.1	HBA78_16170	2207544	2208277	-1	phage portal protein
			NLS32534.1	HBA78_16175	2208277	2208459	-1	hypothetical protein
			NLS32535.1	HBA78_16180	2208471	2210228	-1	terminase large subunit
			NLS32536.1	HBA78_16185	2210228	2210710	-1	phage terminase small subunit P27 family
			NLS32537.1	HBA78_16190	2210859	2211209	-1	HNH endonuclease
			NLS32538.1	HBA78_16195	2211217	2211417	-1	hypothetical protein
			NLS32539.1	HBA78_16200	2211414	2211653	-1	hypothetical protein
			NLS32540.1	HBA78_16205	2211739	2211924	-1	hypothetical protein
			NLS32541.1	HBA78_16210	2212141	2212674	-1	lysozyme
			NLS32542.1	HBA78_16215	2212738	2213088	-1	YdfR family protein
			NLS32543.1	HBA78_16220	2213093	2213308	-1	holin
			NLS32544.1	HBA78_16245	2214106	2214795	-1	antiterminator
			NLS32545.1	HBA78_16250	2214792	2215151	-1	RusA family crossover junction endodeoxyribonuclease
			NLS32546.1	HBA78_16255	2215164	2216213	-1	DUF968 domain-containing protein
			NLS32547.1	HBA78_16260	2216215	2216493	-1	hypothetical protein
			NLS32548.1	HBA78_16265	2216790	2217086	-1	hypothetical protein
			NLS32549.1	HBA78_16270	2217326	2217538	-1	type I toxin-antitoxin system Hok family toxin
			NLS32550.1	HBA78_16275	2217583	2217690	1	hypothetical protein
			NLS32551.1	HBA78_16280	2218068	2219093	-1	hypothetical protein
			NLS32552.1	HBA78_16285	2219324	2219746	-1	DUF977 family protein
			NLS32553.1	HBA78_16290	2219787	2220857	-1	phage replisome organizer
			NLS32554.1	HBA78_16295	2220929	2221354	-1	Rha family transcriptional regulator
			NLS32555.1	HBA78_16300	2221338	2221580	-1	hypothetical protein
			NLS32556.1	HBA78_16305	2221972	2222310	1	peptidase S24
			NLS32557.1	HBA78_16310	2222603	2222758	1	DUF1391 family protein
			NLS32558.1	HBA78_16315	2222918	2223136	1	hypothetical protein
			NLS32559.1	HBA78_16320	2223140	2223304	-1	hypothetical protein
			NLS32560.1	HBA78_16325	2223704	2223892	1	cell division inhibition protein DicB
			NLS32561.1	HBA78_16330	2223889	2224080	1	DUF1482 family protein
			NLS32562.1	HBA78_16335	2224174	2226615	1	exonuclease
2216215	2224080	7865	NLS32547.1	HBA78_16260	2216215	2216493	-1	hypothetical protein
			NLS32548.1	HBA78_16265	2216790	2217086	-1	hypothetical protein
			NLS32549.1	HBA78_16270	2217326	2217538	-1	type I toxin-antitoxin system Hok family toxin
			NLS32550.1	HBA78_16275	2217583	2217690	1	hypothetical protein
			NLS32551.1	HBA78_16280	2218068	2219093	-1	hypothetical protein
			NLS32552.1	HBA78_16285	2219324	2219746	-1	DUF977 family protein
			NLS32553.1	HBA78_16290	2219787	2220857	-1	phage replisome organizer
			NLS32554.1	HBA78_16295	2220929	2221354	-1	Rha family transcriptional regulator
			NLS32555.1	HBA78_16300	2221338	2221580	-1	hypothetical protein
			NLS32556.1	HBA78_16305	2221972	2222310	1	peptidase S24
			NLS32557.1	HBA78_16310	2222603	2222758	1	DUF1391 family protein
			NLS32558.1	HBA78_16315	2222918	2223136	1	hypothetical protein
			NLS32559.1	HBA78_16320	2223140	2223304	-1	hypothetical protein
			NLS32560.1	HBA78_16325	2223704	2223892	1	cell division inhibition protein DicB
			NLS32561.1	HBA78_16330	2223889	2224080	1	DUF1482 family protein
2303648	2316331	12683	NLS32630.1	HBA78_16715	2303648	2305072	-1	mannose-1-phosphate guanylyltransferase/mannose-6-phosphate isomerase
			NLS32631.1	HBA78_16720	2305069	2305896	-1	glycosyltransferase
			NLS32632.1	HBA78_16725	2305886	2306998	-1	glycosyltransferase family 4 protein
			NLS32633.1	HBA78_16730	2306995	2308170	-1	O7 family O-antigen polymerase
			NLS32634.1	HBA78_16735	2308167	2308988	-1	sugar polymerase
			NLS32635.1	HBA78_16740	2308988	2309734	-1	glycosyl transferase
			NLS32636.1	HBA78_16745	2309731	2310309	-1	acyltransferase
			NLS32637.1	HBA78_16750	2310311	2311423	-1	DegT/DnrJ/EryC1/StrS family aminotransferase
			NLS32638.1	HBA78_16755	2311426	2312856	-1	O7 family O-antigen flippase
			NLS32639.1	HBA78_16760	2312860	2313405	-1	dTDP-4-dehydrorhamnose 3,5-epimerase
			NLS32640.1	HBA78_16765	2313410	2314288	-1	glucose-1-phosphate thymidylyltransferase RfbA
			NLS32641.1	HBA78_16770	2314347	2315246	-1	dTDP-4-dehydrorhamnose reductase
			NLS32642.1	HBA78_16775	2315246	2316331	-1	dTDP-glucose 4,6-dehydratase
			NLS30703.1	HBA78_06770	2658148	2658348	1	phage tail protein
			NLS30702.1	HBA78_06765	2658351	2658674	1	holin
			NLS30701.1	HBA78_06760	2658671	2659063	1	M15 family metallopeptidase
			NLS30700.1	HBA78_06755	2659060	2659467	1	DUF2570 domain-containing protein
			NLS30699.1	HBA78_06750	2659605	2660072	1	phage tail protein
			NLS30698.1	HBA78_06745	2660065	2660700	1	phage virion morphogenesis protein
			NLS30697.1	HBA78_06740	2660697	2661278	1	phage baseplate assembly protein V
			NLS30696.1	HBA78_06735	2661275	2661625	1	baseplate assembly protein
			NLS30695.1	HBA78_06730	2661629	2662525	1	baseplate assembly protein
			NLS30694.1	HBA78_06725	2662518	2663126	1	phage tail protein I
			NLS30693.1	HBA78_06720	2663123	2664793	1	phage tail protein
			NLS30692.1	HBA78_06715	2664804	2665232	1	phage tail protein
			NLS30691.1	HBA78_06710	2665273	2665701	1	phage tail protein
			NLS30690.1	HBA78_06705	2665701	2666312	1	tail fiber assembly protein
			NLS30689.1	HBA78_06700	2666319	2666777	-1	tail fiber protein
			NLS30688.1	HBA78_06695	2666806	2667309	-1	tail fiber protein
			NLS30687.1	HBA78_06690	2667381	2667980	1	recombinase family protein
			NLS30686.1	HBA78_06685	2668007	2668495	-1	phage tail protein
2714031	2724742	10711	NLS30642.1	HBA78_06455	2714031	2715569	-1	multidrug efflux MFS transporter permease subunit EmrY
			NLS30641.1	HBA78_06450	2715569	2716732	-1	multidrug efflux MFS transporter periplasmic adaptor subunit EmrK
			NLS30640.1	HBA78_06445	2717148	2717762	1	acid-sensing system DNA-binding response regulator EvgA
			NLS30639.1	HBA78_06440	2717767	2721360	1	acid-sensing system histidine kinase EvgS
			NLS34017.1	HBA78_23940	2722579	2723724	-1	CoA:oxalate CoA-transferase
			NLS34018.1	HBA78_23945	2723798	2724742	-1	transporter YfdV
2856247	2863688	7441	NLS32108.1	HBA78_14010	2856247	2856399	-1	hypothetical protein
			NLS32107.1	HBA78_14005	2856417	2856608	1	DUF2633 family protein
			NLS32106.1	HBA78_14000	2856919	2857437	1	glycine zipper 2TM domain-containing protein
			NLS32105.1	HBA78_13995	2857453	2857992	1	DUF5384 family protein
			NLS32104.1	HBA78_13990	2858212	2858694	-1	DUF2514 domain-containing protein
			NLS32103.1	HBA78_13985	2858691	2859320	-1	glycoside hydrolase family 19 protein
			NLS32102.1	HBA78_13980	2859310	2859618	-1	phage holin family protein
			NLS32101.1	HBA78_13975	2859605	2860009	-1	hypothetical protein
			NLS32100.1	HBA78_13970	2860382	2862136	-1	tail fiber domain-containing protein
				HBA78_13965	2862578	2863234	-1	phage tail protein
			NLS32099.1	HBA78_13960	2863431	2863688	1	hypothetical protein
2857453	2892248	34795	NLS32105.1	HBA78_13995	2857453	2857992	1	DUF5384 family protein
			NLS32104.1	HBA78_13990	2858212	2858694	-1	DUF2514 domain-containing protein
			NLS32103.1	HBA78_13985	2858691	2859320	-1	glycoside hydrolase family 19 protein
			NLS32102.1	HBA78_13980	2859310	2859618	-1	phage holin family protein
			NLS32101.1	HBA78_13975	2859605	2860009	-1	hypothetical protein
			NLS32100.1	HBA78_13970	2860382	2862136	-1	tail fiber domain-containing protein
				HBA78_13965	2862578	2863234	-1	phage tail protein
			NLS32099.1	HBA78_13960	2863431	2863688	1	hypothetical protein
			NLS32098.1	HBA78_13955	2864002	2864688	1	anti-repressor protein
			NLS32097.1	HBA78_13950	2864807	2865442	1	hypothetical protein
			NLS32096.1	HBA78_13945	2865544	2865705	1	transmembrane anchored protein
			NLS32095.1	HBA78_13940	2865737	2866033	-1	hypothetical protein
			NLS32094.1	HBA78_13935	2866229	2868703	-1	hypothetical protein
			NLS32093.1	HBA78_13930	2868709	2870511	-1	hypothetical protein
			NLS32092.1	HBA78_13925	2870508	2873021	-1	hypothetical protein
			NLS32091.1	HBA78_13920	2873021	2873566	-1	hypothetical protein
			NLS32090.1	HBA78_13915	2873566	2874030	-1	hypothetical protein
			NLS32089.1	HBA78_13910	2874030	2876501	-1	hypothetical protein
			NLS32088.1	HBA78_13905	2876501	2877106	-1	hypothetical protein
			NLS32087.1	HBA78_13900	2877163	2877498	-1	hypothetical protein
			NLS32086.1	HBA78_13895	2877509	2877946	-1	hypothetical protein
			NLS32085.1	HBA78_13890	2877998	2878984	-1	hypothetical protein
			NLS32084.1	HBA78_13885	2878999	2879694	-1	peptidase
			NLS32083.1	HBA78_13880	2879697	2879993	-1	hypothetical protein
			NLS32082.1	HBA78_13875	2879990	2881669	-1	phage tail protein
			NLS32081.1	HBA78_13870	2881684	2881890	-1	hypothetical protein
			NLS32080.1	HBA78_13860	2882593	2883012	1	hypothetical protein
			NLS32079.1	HBA78_13855	2883103	2884578	-1	terminase
			NLS32078.1	HBA78_13850	2884575	2885249	-1	terminase small subunit
			NLS32077.1	HBA78_13845	2885290	2885628	-1	hypothetical protein
			NLS32076.1	HBA78_13840	2885621	2885902	-1	ASCH domain-containing protein
			NLS32075.1	HBA78_13835	2885895	2886287	-1	DUF551 domain-containing protein
				HBA78_13830	2886284	2886570	-1	hypothetical protein
			NLS32074.1	HBA78_13825	2886572	2886790	-1	DUF4014 family protein
			NLS32073.1	HBA78_13820	2886924	2887229	-1	hypothetical protein
			NLS32072.1	HBA78_13815	2887222	2887476	-1	hypothetical protein
			NLS32071.1	HBA78_13810	2887473	2888183	-1	hypothetical protein
			NLS32070.1	HBA78_13805	2888245	2888589	-1	DUF1064 domain-containing protein
			NLS32069.1	HBA78_13800	2888707	2889492	-1	replication protein
			NLS32068.1	HBA78_13795	2889489	2890304	-1	primosomal protein
			NLS32067.1	HBA78_13790	2890320	2890520	-1	hypothetical protein
			NLS32066.1	HBA78_13785	2890671	2890901	-1	hypothetical protein
			NLS32065.1	HBA78_13780	2891056	2891640	1	helix-turn-helix transcriptional regulator
			NLS32064.1	HBA78_13775	2891794	2891946	1	hypothetical protein
			NLS32063.1	HBA78_13770	2891949	2892248	1	hypothetical protein
			NLS32062.1	HBA78_13765	2892245	2893066	1	exodeoxyribonuclease VIII
2865737	2873566	7829	NLS32095.1	HBA78_13940	2865737	2866033	-1	hypothetical protein
			NLS32094.1	HBA78_13935	2866229	2868703	-1	hypothetical protein
			NLS32093.1	HBA78_13930	2868709	2870511	-1	hypothetical protein
			NLS32092.1	HBA78_13925	2870508	2873021	-1	hypothetical protein
			NLS32091.1	HBA78_13920	2873021	2873566	-1	hypothetical protein
2882593	2890901	8308	NLS32080.1	HBA78_13860	2882593	2883012	1	hypothetical protein
			NLS32079.1	HBA78_13855	2883103	2884578	-1	terminase
			NLS32078.1	HBA78_13850	2884575	2885249	-1	terminase small subunit
			NLS32077.1	HBA78_13845	2885290	2885628	-1	hypothetical protein
			NLS32076.1	HBA78_13840	2885621	2885902	-1	ASCH domain-containing protein
			NLS32075.1	HBA78_13835	2885895	2886287	-1	DUF551 domain-containing protein
				HBA78_13830	2886284	2886570	-1	hypothetical protein
			NLS32074.1	HBA78_13825	2886572	2886790	-1	DUF4014 family protein
			NLS32073.1	HBA78_13820	2886924	2887229	-1	hypothetical protein
			NLS32072.1	HBA78_13815	2887222	2887476	-1	hypothetical protein
			NLS32071.1	HBA78_13810	2887473	2888183	-1	hypothetical protein
			NLS32070.1	HBA78_13805	2888245	2888589	-1	DUF1064 domain-containing protein
			NLS32069.1	HBA78_13800	2888707	2889492	-1	replication protein
			NLS32068.1	HBA78_13795	2889489	2890304	-1	primosomal protein
			NLS32067.1	HBA78_13790	2890320	2890520	-1	hypothetical protein
			NLS32066.1	HBA78_13785	2890671	2890901	-1	hypothetical protein
2980665	2998086	17421	NLS31983.1	HBA78_13360	2980127	2980690	-1	hypothetical protein
			NLS31982.1	HBA78_13355	2980665	2981054	-1	head-tail adaptor
			NLS31981.1	HBA78_13350	2981041	2981595	-1	hypothetical protein
			NLS31980.1	HBA78_13345	2981592	2981999	-1	DUF4054 domain-containing protein
			NLS31979.1	HBA78_13340	2981965	2982333	-1	hypothetical protein
			NLS31978.1	HBA78_13335	2982374	2983315	-1	DUF2184 domain-containing protein
			NLS31977.1	HBA78_13330	2983327	2983833	-1	hypothetical protein
			NLS31976.1	HBA78_13325	2983837	2985057	-1	DUF2213 domain-containing protein
			NLS31975.1	HBA78_13320	2985072	2985806	-1	minor capsid protein
			NLS31974.1	HBA78_13315	2985697	2987163	-1	DUF1073 domain-containing protein
			NLS31973.1	HBA78_13310	2987163	2988785	-1	TerL protein
			NLS31972.1	HBA78_13305	2988788	2989360	-1	terminase small subunit
			NLS31971.1	HBA78_13300	2989422	2989946	-1	hypothetical protein
			NLS31970.1	HBA78_13295	2989930	2990406	-1	glycoside hydrolase family protein
			NLS31969.1	HBA78_13290	2990410	2990751	-1	phage holin, lambda family
			NLS31968.1	HBA78_13285	2991196	2991537	-1	hypothetical protein
			NLS31967.1	HBA78_13280	2991569	2991991	-1	antitermination protein
			NLS31966.1	HBA78_13275	2992037	2992267	-1	hypothetical protein
			NLS31965.1	HBA78_13270	2992587	2994848	-1	DNA primase
			NLS31964.1	HBA78_13265	2994852	2995052	-1	transcriptional regulator
			NLS31963.1	HBA78_13260	2995194	2995868	1	helix-turn-helix transcriptional regulator
			NLS31962.1	HBA78_13255	2996244	2996813	-1	hypothetical protein
			NLS31961.1	HBA78_13250	2997038	2997187	1	hypothetical protein
			NLS31960.1	HBA78_13245	2997184	2998086	1	hypothetical protein
2994852	3000642	5790	NLS31964.1	HBA78_13265	2994852	2995052	-1	transcriptional regulator
			NLS31963.1	HBA78_13260	2995194	2995868	1	helix-turn-helix transcriptional regulator
			NLS31962.1	HBA78_13255	2996244	2996813	-1	hypothetical protein
			NLS31961.1	HBA78_13250	2997038	2997187	1	hypothetical protein
			NLS31960.1	HBA78_13245	2997184	2998086	1	hypothetical protein
			NLS31959.1	HBA78_13240	2998089	2999390	1	DUF2800 domain-containing protein
			NLS31958.1	HBA78_13235	2999406	2999960	1	DUF2815 family protein
			NLS31957.1	HBA78_13230	3000013	3000642	-1	hypothetical protein
			NLS32931.1	HBA78_18235	3096944	3097087	-1	hypothetical protein
			NLS32930.1	HBA78_18230	3097541	3098995	-1	DUF5507 domain-containing protein
			NLS32929.1	HBA78_18220	3100387	3102639	1	hypothetical protein
3312762	3339920	27158	NLS30269.1	HBA78_04545	3312762	3313394	1	helix-turn-helix transcriptional regulator
			NLS30270.1	HBA78_04550	3313728	3314537	1	transcriptional regulator
			NLS30271.1	HBA78_04555	3314530	3315012	1	hypothetical protein
			NLS30272.1	HBA78_04560	3315045	3315125	-1	hypothetical protein
			NLS30273.1	HBA78_04565	3315161	3315586	-1	hypothetical protein
			NLS30274.1	HBA78_04570	3316016	3316507	1	hypothetical protein
			NLS30275.1	HBA78_04575	3316732	3317223	1	tetratricopeptide repeat protein
			NLS30276.1	HBA78_04580	3317558	3318934	1	HilA family transcriptional regulator YgeH
			NLS30277.1	HBA78_04585	3319102	3319320	1	hypothetical protein
			NLS30278.1	HBA78_04590	3319404	3319907	1	lytic transglycosylase domain-containing protein
			NLS30279.1	HBA78_04595	3319926	3320558	-1	response regulator transcription factor
			NLS30280.1	HBA78_04600	3320781	3320990	-1	hypothetical protein
				HBA78_04605	3321225	3321488	-1	hypothetical protein
			NLS30281.1	HBA78_04610	3321415	3322011	-1	type III secretion apparatus protein OrgA/MxiK
			NLS30282.1	HBA78_04615	3322027	3322761	-1	EscJ/YscJ/HrcJ family type III secretion inner membrane ring protein
			NLS30283.1	HBA78_04620	3322758	3323090	-1	type III secretion system inner rod subunit SctI
			NLS30284.1	HBA78_04625	3323110	3323349	-1	type III secretion system needle complex protein
			NLS30285.1	HBA78_04630	3323363	3324544	-1	PrgH/EprH family type III secretion apparatus protein
			NLS30286.1	HBA78_04635	3324803	3325303	1	helix-turn-helix transcriptional regulator
			NLS30287.1	HBA78_04640	3325333	3325599	1	invasion protein
			NLS30288.1	HBA78_04645	3325669	3326781	-1	EscU/YscU/HrcU family type III secretion system export apparatus switch protein
			NLS30289.1	HBA78_04650	3326790	3327557	-1	type III secretion system export apparatus subunit SctT
			NLS30290.1	HBA78_04655	3327559	3327819	-1	EscS/YscS/HrcS family type III secretion system export apparatus protein
			NLS30291.1	HBA78_04660	3327829	3328494	-1	EscR/YscR/HrcR family type III secretion system export apparatus protein
			NLS30292.1	HBA78_04665	3328484	3329431	-1	YscQ/HrcQ family type III secretion apparatus protein
			NLS30293.1	HBA78_04670	3329431	3330306	-1	type III secretion protein
			NLS30294.1	HBA78_04675	3330284	3330742	-1	type III secretion protein
			NLS30295.1	HBA78_04680	3330732	3332024	-1	FliI/YscN family ATPase
			NLS30296.1	HBA78_04685	3332056	3334116	-1	EscV/YscV/HrcV family type III secretion system export apparatus protein
			NLS30297.1	HBA78_04690	3334109	3335254	-1	YopN/LcrE/InvE/MxiC type III secretion system gatekeeper
			NLS30298.1	HBA78_04695	3335259	3336962	-1	EscC/YscC/HrcC family type III secretion system outer membrane ring protein
			NLS30299.1	HBA78_04700	3336959	3337708	-1	helix-turn-helix domain-containing protein
			NLS30300.1	HBA78_04705	3338054	3338233	-1	GhoT/OrtT family toxin
			NLS30301.1	HBA78_04710	3338271	3339920	-1	hypothetical protein
3464208	3471058	6850	NLS30414.1	HBA78_05295	3464208	3465800	-1	acetyltransferase
			NLS30415.1	HBA78_05300	3466029	3469367	-1	capsule biosynthesis protein CapA
			NLS30416.1	HBA78_05305	3469606	3470301	-1	CMP-N-acetylneuraminic acid synthetase
			NLS30417.1	HBA78_05310	3470387	3471058	-1	ABC transporter ATP-binding protein
			NLS30418.1	HBA78_05315	3471055	3471831	-1	ABC transporter permease
			NLS33175.1	HBA78_19520	3975590	3976195	1	RHS repeat protein
			NLS33176.1	HBA78_19525	3976192	3976761	1	hypothetical protein
			NLS33177.1	HBA78_19530	3977032	3977277	1	hypothetical protein
			NLS33178.1	HBA78_19535	3977860	3978180	1	hypothetical protein
			NLS33179.1	HBA78_19540	3978429	3978794	1	pentapeptide repeat-containing protein
				HBA78_19545	3978766	3979142	1	hypothetical protein
			NLS33180.1	HBA78_19550	3979247	3980089	1	lyase
			NLS33181.1	HBA78_19555	3980137	3980796	1	RHS repeat protein
			NLS33182.1	HBA78_19560	3981110	3981589	1	sel1 repeat family protein
				HBA78_19565	3981655	3981783	1	IS630 family transposase
				HBA78_19570	3981919	3982308	1	ISAs1 family transposase
4171985	4177862	5877	NLS33381.1	HBA78_20575	4171985	4173238	-1	O-antigen ligase family protein
			NLS33380.1	HBA78_20570	4173273	4174046	-1	glycosyltransferase family 25 protein
			NLS33379.1	HBA78_20565	4174078	4175106	-1	UDP-galactose--(galactosyl) LPS alpha1,2-galactosyltransferase
			NLS33378.1	HBA78_20560	4175132	4175824	-1	lipopolysaccharide core heptose(II) kinase RfaY
			NLS33377.1	HBA78_20555	4175834	4176829	-1	lipopolysaccharide 1,2-glucosyltransferase
			NLS33376.1	HBA78_20550	4176846	4177862	-1	lipopolysaccharide 3-alpha-galactosyltransferase
4220611	4227573	6962	NLS33335.1	HBA78_20335	4220611	4221108	1	SycD/LcrH family type III secretion system chaperone
			NLS33334.1	HBA78_20330	4221118	4221300	1	hypothetical protein
			NLS33333.1	HBA78_20325	4221356	4223137	1	YopB/SseC family type III secretion system translocon subunit
			NLS33332.1	HBA78_20320	4223150	4224280	1	hypothetical protein
			NLS33331.1	HBA78_20315	4224324	4225673	1	IpaD/SipD/SspD family type III secretion system needle tip protein
			NLS33330.1	HBA78_20310	4225876	4227573	1	HilA family transcriptional regulator EilA
4279447	4286856	7409	NLS32853.1	HBA78_17840	4279447	4279854	-1	YidB family protein
			NLS32852.1	HBA78_17835	4280085	4282499	-1	DNA topoisomerase (ATP-hydrolyzing) subunit B
			NLS32851.1	HBA78_17830	4282528	4283601	-1	DNA replication/repair protein RecF
			NLS32850.1	HBA78_17825	4283601	4284701	-1	DNA polymerase III subunit beta
			NLS32849.1	HBA78_17820	4284706	4286109	-1	chromosomal replication initiator protein DnaA
			NLS32848.1	HBA78_17815	4286406	4286486	1	hypothetical protein
			NLS32847.1	HBA78_17810	4286716	4286856	1	50S ribosomal protein L34
4302434	4309306	6872	NLS32832.1	HBA78_17735	4302434	4304842	-1	type III effector
			NLS32831.1	HBA78_17730	4305151	4306338	1	pentapeptide repeat-containing protein
			NLS32830.1	HBA78_17725	4306808	4309306	-1	type III effector protein
			NLS33039.1	HBA78_18785	4477357	4479171	1	hypothetical protein
			NLS33040.1	HBA78_18790	4479339	4480247	-1	alpha/beta hydrolase
			NLS33041.1	HBA78_18795	4480476	4480787	1	type II toxin-antitoxin system RelE/ParE family toxin
			NLS33042.1	HBA78_18800	4480788	4481078	1	helix-turn-helix domain-containing protein
				HBA78_18805	4481163	4481374	1	hypothetical protein
			NLS33043.1	HBA78_18810	4481436	4481714	1	hypothetical protein
			NLS33044.1	HBA78_18815	4482133	4482351	1	CopG family transcriptional regulator
			NLS33045.1	HBA78_18820	4482570	4482812	1	hypothetical protein
4571653	4580719	9066	NLS33644.1	HBA78_21985	4571653	4572345	-1	L-ribulose-5-phosphate 4-epimerase
			NLS33643.1	HBA78_21980	4572799	4573608	1	DeoR/GlpR transcriptional regulator
			NLS33642.1	HBA78_21975	4573731	4574735	1	autoinducer 2 ABC transporter substrate-binding protein
			NLS33641.1	HBA78_21970	4574799	4576316	1	sugar ABC transporter ATP-binding protein
			NLS33640.1	HBA78_21965	4576309	4577301	1	ABC transporter permease
			NLS33639.1	HBA78_21960	4577315	4578361	1	ABC transporter permease
			NLS33638.1	HBA78_21955	4578361	4579224	1	L-ribulose-5-phosphate 3-epimerase
			NLS33637.1	HBA78_21950	4579241	4580719	1	carbohydrate kinase
4889022	4893727	4705	NLS31540.1	HBA78_11065	4889022	4889156	-1	pyr operon leader peptide
			NLS31541.1	HBA78_11070	4889437	4889832	-1	RidA family protein
			NLS31542.1	HBA78_11075	4889963	4890676	-1	SDR family oxidoreductase
			NLS31543.1	HBA78_11080	4890747	4891340	1	TetR/AcrR family transcriptional regulator
			NLS31544.1	HBA78_11085	4891485	4891937	1	DUF386 domain-containing protein
			NLS31545.1	HBA78_11090	4892060	4893727	1	DNA-binding protein
4925067	4931741	6674	NLS31569.1	HBA78_11215	4925067	4925717	1	HNH endonuclease
			NLS31570.1	HBA78_11220	4925725	4926705	-1	sialate O-acetylesterase
			NLS31571.1	HBA78_11225	4926770	4927876	-1	N-acetylneuraminate epimerase
			NLS31572.1	HBA78_11230	4927896	4928612	-1	N-acetylneuraminic acid outer membrane channel NanC
			NLS31573.1	HBA78_11235	4930065	4930667	1	type 1 fimbria regulatory protein FimB
			NLS31574.1	HBA78_11240	4931145	4931741	1	type 1 fimbria regulatory protein FimE
5014100	5206778	192678	NLS31644.1	HBA78_11610	5014100	5017927	1	hypothetical protein
			NLS31645.1	HBA78_11615	5018324	5018944	-1	DUF551 domain-containing protein
			NLS31646.1	HBA78_11620	5018944	5019306	-1	DUF551 domain-containing protein
			NLS31647.1	HBA78_11625	5019297	5019833	-1	5'-deoxynucleotidase
			NLS31648.1	HBA78_11630	5019962	5020786	-1	DUF2303 family protein
			NLS31649.1	HBA78_11635	5020852	5021214	-1	hypothetical protein
				HBA78_11640	5021229	5021539	-1	hypothetical protein
			NLS31650.1	HBA78_11645	5021708	5022205	1	hypothetical protein
			NLS31651.1	HBA78_11650	5022436	5023062	-1	LexA family transcriptional regulator
			NLS31652.1	HBA78_11655	5023161	5023361	1	cell division protein
			NLS31653.1	HBA78_11660	5023399	5023956	1	protein YmfL
			NLS31654.1	HBA78_11665	5024132	5024311	1	DUF4222 domain-containing protein
			NLS31655.1	HBA78_11670	5024301	5025242	1	helix-turn-helix domain-containing protein
			NLS31656.1	HBA78_11675	5025239	5025733	1	PerC family transcriptional regulator
			NLS31657.1	HBA78_11680	5025733	5026386	1	phage N-6-adenine-methyltransferase
			NLS31658.1	HBA78_11685	5026383	5026709	1	LexA family transcriptional regulator
			NLS31659.1	HBA78_11690	5026706	5027101	1	RusA family crossover junction endodeoxyribonuclease
			NLS31660.1	HBA78_11695	5027264	5028079	1	KilA-N domain-containing protein
			NLS31661.1	HBA78_11700	5028087	5029076	1	DUF968 domain-containing protein
			NLS31662.1	HBA78_11705	5029090	5029842	1	antitermination protein
			NLS31663.1	HBA78_11710	5030121	5030210	-1	hypothetical protein
				HBA78_11715	5030265	5030477	-1	cold shock-like protein CspF
			NLS31664.1	HBA78_11720	5030778	5030993	1	cold shock-like protein CspB
			NLS31665.1	HBA78_11725	5031746	5031961	1	holin
			NLS31666.1	HBA78_11730	5031966	5032517	1	YdfR family protein
			NLS31667.1	HBA78_11735	5032465	5032725	-1	hypothetical protein
			NLS31668.1	HBA78_11740	5032839	5033372	1	lysozyme
			NLS31669.1	HBA78_11745	5033369	5033866	1	DUF2514 domain-containing protein
			NLS31670.1	HBA78_11750	5034230	5034442	1	cold shock protein CspI
			NLS31671.1	HBA78_11755	5034453	5034641	1	cold-shock protein
			NLS31672.1	HBA78_11760	5034789	5034944	1	hypothetical protein
			NLS31673.1	HBA78_11765	5035117	5035290	1	addiction module toxin, GnsA/GnsB family
			NLS31674.1	HBA78_11770	5035586	5035792	1	hypothetical protein
			NLS31675.1	HBA78_11775	5036043	5036237	-1	DUF3950 domain-containing protein
			NLS31676.1	HBA78_11780	5036665	5037171	1	DNA-packaging protein
			NLS31677.1	HBA78_11785	5037143	5039071	1	phage terminase large subunit family protein
			NLS31678.1	HBA78_11790	5039055	5039261	1	phage tail protein
			NLS31679.1	HBA78_11795	5039258	5040850	1	phage portal protein
			NLS31680.1	HBA78_11800	5040840	5042345	1	S49 family peptidase
			NLS31681.1	HBA78_11805	5042382	5042729	1	head decoration protein
			NLS31682.1	HBA78_11810	5042787	5043815	1	major capsid protein
			NLS31683.1	HBA78_11815	5043867	5044241	1	hypothetical protein
			NLS31684.1	HBA78_11820	5044234	5044587	1	phage tail protein
			NLS31685.1	HBA78_11825	5044598	5045176	1	phage tail protein
			NLS31686.1	HBA78_11830	5045173	5045568	1	phage tail protein
			NLS31687.1	HBA78_11835	5045576	5046316	1	phage tail protein
			NLS31688.1	HBA78_11840	5046332	5046745	1	phage minor tail protein G
			NLS31689.1	HBA78_11845	5046727	5047161	1	phage tail assembly protein T
			NLS31690.1	HBA78_11850	5047154	5049715	1	phage tail tape measure protein
			NLS31691.1	HBA78_11855	5049712	5050041	1	phage tail protein
			NLS31692.1	HBA78_11860	5050041	5050739	1	phage minor tail protein L
			NLS31693.1	HBA78_11865	5050744	5051487	1	phage tail protein
			NLS31694.1	HBA78_11870	5051424	5052056	1	tail assembly protein
			NLS31695.1	HBA78_11875	5052117	5054150	1	host specificity protein J
			NLS34179.1	HBA78_24835	5055151	5056707	1	invasin
			NLS34175.1	HBA78_24805	5057708	5059923	-1	autotransporter outer membrane beta-barrel domain-containing protein
			NLS34176.1	HBA78_24810	5061313	5062007	1	IS1 family transposase
			NLS34181.1	HBA78_24845	5063584	5064694	-1	RHS repeat protein
				HBA78_21100	5066015	5066293	-1	DUF5462 family protein
				HBA78_21105	5066930	5067629	1	transposase
				HBA78_21110	5067879	5071011	1	hypothetical protein
			NLS33484.1	HBA78_21115	5071534	5071947	1	hypothetical protein
			NLS33485.1	HBA78_21120	5071949	5072731	1	phage integrase family protein
			NLS33486.1	HBA78_21125	5072868	5073143	-1	CopG family transcriptional regulator
			NLS33487.1	HBA78_21130	5073137	5073781	-1	AAA family ATPase
			NLS33488.1	HBA78_21135	5074003	5074974	1	plasmid segregation protein parM
			NLS33489.1	HBA78_21140	5074979	5075371	1	plasmid stability protein
			NLS33490.1	HBA78_21145	5075376	5076647	-1	Y-family DNA polymerase
			NLS33491.1	HBA78_21150	5076647	5077084	-1	translesion error-prone DNA polymerase V autoproteolytic subunit
			NLS33492.1	HBA78_21155	5077081	5077329	-1	DinI family protein
				HBA78_21160	5077747	5078649	1	DUF1281 domain-containing protein
			NLS33493.1	HBA78_21165	5078646	5078957	1	hypothetical protein
			NLS33494.1	HBA78_21170	5079034	5079717	1	DNA methylase
			NLS33495.1	HBA78_21175	5079718	5079939	1	hypothetical protein
				HBA78_21180	5079833	5080379	1	DUF1380 domain-containing protein
				HBA78_21185	5080424	5080779	1	hypothetical protein
				HBA78_21190	5081067	5081500	1	DUF1472 domain-containing protein
			NLS33496.1	HBA78_21195	5081596	5081898	1	antirestriction protein
			NLS33497.1	HBA78_21200	5081945	5082064	1	DNA methylase
				HBA78_21205	5082095	5082555	1	hypothetical protein
			NLS33498.1	HBA78_21210	5083502	5083732	1	hypothetical protein
			NLS33499.1	HBA78_21215	5083784	5085145	1	DUF3560 domain-containing protein
			NLS33500.1	HBA78_21220	5085192	5085755	1	class I SAM-dependent methyltransferase
			NLS33501.1	HBA78_21225	5085736	5086068	-1	pilus protein
			NLS33502.1	HBA78_21230	5086129	5086317	1	hypothetical protein
			NLS33503.1	HBA78_21235	5086551	5087090	1	single-stranded DNA-binding protein
			NLS33504.1	HBA78_21240	5087147	5087380	1	DUF905 family protein
			NLS33505.1	HBA78_21245	5087444	5089408	1	ParB/RepB/Spo0J family partition protein
			NLS33506.1	HBA78_21250	5089463	5089897	1	conjugation system SOS inhibitor PsiB
			NLS33507.1	HBA78_21255	5089894	5090613	1	plasmid SOS inhibition protein A
			NLS33508.1	HBA78_21260	5090884	5091042	1	type I toxin-antitoxin system Hok family toxin
			NLS33509.1	HBA78_21265	5091520	5091708	1	hypothetical protein
			NLS33510.1	HBA78_21270	5091941	5092228	1	hypothetical protein
				HBA78_21275	5092350	5093170	1	DUF945 domain-containing protein
			NLS33511.1	HBA78_21280	5093466	5094056	-1	transglycosylase SLT domain-containing protein
			NLS33512.1	HBA78_21285	5094389	5094772	1	relaxosome protein TraM
			NLS33513.1	HBA78_21290	5094959	5095648	1	conjugal transfer transcriptional regulator TraJ
			NLS33514.1	HBA78_21295	5095746	5096141	1	conjugal transfer relaxosome protein TraY
			NLS33515.1	HBA78_21300	5096174	5096539	1	type IV conjugative transfer system pilin TraA
			NLS33516.1	HBA78_21305	5096554	5096865	1	type IV conjugative transfer system protein TraL
			NLS33517.1	HBA78_21310	5096887	5097453	1	type IV conjugative transfer system protein TraE
			NLS33518.1	HBA78_21315	5097464	5098168	1	type-F conjugative transfer system secretin TraK
			NLS33519.1	HBA78_21320	5098168	5099595	1	conjugal transfer protein TraB
			NLS33520.1	HBA78_21325	5099585	5100175	1	conjugal transfer protein TraP
			NLS33521.1	HBA78_21330	5100129	5100359	1	conjugal transfer protein TrbD
				HBA78_21335	5100371	5100621	1	conjugal transfer protein TrbG
			NLS33522.1	HBA78_21340	5100618	5101133	1	type IV conjugative transfer system lipoprotein TraV
			NLS33523.1	HBA78_21345	5101268	5101489	1	conjugal transfer protein TraR
			NLS33524.1	HBA78_21350	5101649	5104276	1	type IV secretion system protein TraC
			NLS33525.1	HBA78_21355	5104273	5104659	1	type-F conjugative transfer system protein TrbI
			NLS33526.1	HBA78_21360	5104656	5105288	1	type-F conjugative transfer system protein TraW
			NLS33527.1	HBA78_21365	5105285	5106277	1	conjugal transfer pilus assembly protein TraU
			NLS33528.1	HBA78_21370	5106286	5106924	1	type-F conjugative transfer system pilin assembly protein TrbC
			NLS33529.1	HBA78_21375	5106921	5108729	1	type-F conjugative transfer system mating-pair stabilization protein TraN
			NLS33530.1	HBA78_21380	5108756	5109013	1	conjugal transfer protein TrbE
			NLS33531.1	HBA78_21385	5109006	5109749	1	type-F conjugative transfer system pilin assembly protein TraF
			NLS33532.1	HBA78_21390	5109765	5110112	1	conjugal transfer protein TrbA
			NLS33533.1	HBA78_21395	5110114	5110428	-1	toxin ArtA
			NLS33534.1	HBA78_21400	5110509	5110793	1	type-F conjugative transfer system pilin chaperone TraQ
			NLS33535.1	HBA78_21405	5110780	5111325	1	type-F conjugative transfer system pilin assembly thiol-disulfide isomerase TrbB
			NLS33536.1	HBA78_21410	5111255	5111629	1	P-type conjugative transfer protein TrbJ
			NLS33537.1	HBA78_21415	5111550	5111972	1	F-type conjugal transfer protein TrbF
			NLS33538.1	HBA78_21420	5111959	5113332	1	conjugal transfer protein TraH
			NLS33539.1	HBA78_21425	5113329	5116148	1	conjugal transfer mating pair stabilization protein TraG
			NLS33540.1	HBA78_21430	5116167	5116664	1	entry exclusion protein
			NLS33541.1	HBA78_21435	5116696	5117427	1	complement resistance protein TraT
			NLS33542.1	HBA78_21440	5117680	5119896	1	type IV conjugative transfer system coupling protein TraD
			NLS33543.1	HBA78_21445	5119896	5125166	1	conjugative transfer relaxase/helicase TraI
			NLS33544.1	HBA78_21450	5125186	5125932	1	conjugal transfer pilus acetylase TraX
			NLS33545.1	HBA78_21455	5125987	5126547	1	fertility inhibition protein FinO
				HBA78_21460	5126682	5126893	1	hypothetical protein
			NLS33546.1	HBA78_21465	5127139	5127600	1	thermonuclease family protein
			NLS33547.1	HBA78_21470	5127646	5127855	1	hemolysin expression modulator Hha
			NLS33548.1	HBA78_21475	5127893	5128471	1	DUF2726 domain-containing protein
			NLS33549.1	HBA78_21480	5128763	5128912	1	type I toxin-antitoxin system Hok family toxin
			NLS33550.1	HBA78_21485	5129196	5129444	1	replication regulatory protein RepA
			NLS33551.1	HBA78_21490	5129690	5129764	1	RepA leader peptide Tap
			NLS33552.1	HBA78_21495	5129757	5130614	1	incFII family plasmid replication initiator RepA
			NLS33553.1	HBA78_21500	5131525	5131794	1	hypothetical protein
				HBA78_21505	5131814	5131984	1	type II toxin-antitoxin system RelE/ParE family toxin
				HBA78_21510	5131990	5132493	-1	helix-turn-helix domain-containing protein
			NLS33554.1	HBA78_21515	5132882	5132998	-1	hypothetical protein
			NLS33555.1	HBA78_21520	5133393	5134382	1	AraC family transcriptional regulator
			NLS33556.1	HBA78_21525	5135171	5136823	1	NAD-dependent malic enzyme
			NLS33557.1	HBA78_21530	5136891	5138351	1	anion permease
				HBA78_21535	5138756	5139021	1	IS1 family transposase
				HBA78_21540	5139117	5140221	1	IS4 family transposase
				HBA78_21545	5140245	5140674	1	IS1 family transposase
			NLS33558.1	HBA78_21550	5140692	5140880	-1	hypothetical protein
			NLS33559.1	HBA78_21555	5141747	5144161	1	F4 (K88) fimbrial usher FaeD
			NLS33560.1	HBA78_21560	5144154	5144930	1	F4 (K88) fimbrial chaperone FaeE
			NLS33561.1	HBA78_21565	5144965	5145341	1	DUF5462 family protein
			NLS34073.1	HBA78_24245	5146775	5147902	-1	hypothetical protein
			NLS34074.1	HBA78_24250	5148890	5149069	1	hypothetical protein
			NLS34075.1	HBA78_24255	5149435	5151006	-1	IS66 family transposase
				HBA78_24260	5151007	5151345	-1	IS66 family insertion sequence element accessory protein TnpB
			NLS34076.1	HBA78_24265	5151438	5151899	1	H-NS histone family protein
			NLS34077.1	HBA78_24270	5151938	5152588	-1	YkgJ family cysteine cluster protein
			NLS34078.1	HBA78_24275	5152760	5156872	-1	autotransporter outer membrane beta-barrel domain-containing protein
			NLS34079.1	HBA78_24280	5157159	5157689	-1	hypothetical protein
			NLS34080.1	HBA78_24285	5157759	5160215	-1	fimbrial biogenesis outer membrane usher protein
			NLS34081.1	HBA78_24290	5160235	5160978	-1	molecular chaperone
			NLS34082.1	HBA78_24295	5161052	5161363	-1	transcriptional regulator
				HBA78_24300	5162791	5163760	-1	IS110 family transposase
			NLS34083.1	HBA78_24305	5164042	5164986	-1	CAAX protease
			NLS34084.1	HBA78_24310	5165593	5166237	-1	recombinase family protein
			NLS34085.1	HBA78_24315	5166524	5167144	1	ParA family protein
			NLS34086.1	HBA78_24320	5167196	5167426	1	DNA partition complex ParG
			NLS34087.1	HBA78_24325	5167583	5167744	1	ribbon-helix-helix protein, CopG family
			NLS34088.1	HBA78_24330	5167769	5168746	1	hypothetical protein
			NLS34089.1	HBA78_24335	5168743	5169099	-1	DNA distortion polypeptide 3
			NLS34090.1	HBA78_24340	5169236	5169682	-1	hypothetical protein
			NLS34091.1	HBA78_24345	5169722	5170558	-1	replication initiation protein
			NLS34092.1	HBA78_24350	5171815	5172066	1	plasmid stabilization protein
				HBA78_24355	5172056	5172151	1	type II toxin-antitoxin system mRNA interferase toxin, RelE/StbE family
			NLS34168.1	HBA78_24770	5187693	5188419	1	hypothetical protein
			NLS34169.1	HBA78_24775	5188552	5189349	1	F4 (K88) fimbria minor subunit FaeH
			NLS34170.1	HBA78_24780	5189380	5190144	1	F4 (K88) fimbria minor subunit FaeI
			NLS34171.1	HBA78_24785	5190732	5191925	-1	IS256 family transposase
			NLS34172.1	HBA78_24790	5192217	5193332	-1	L-threonine dehydrogenase
			NLS34173.1	HBA78_24795	5193335	5193571	-1	hypothetical protein
			NLS34174.1	HBA78_24800	5193820	5194519	-1	hypothetical protein
			NLS34133.1	HBA78_24575	5195520	5198517	-1	host specificity protein J
			NLS34134.1	HBA78_24580	5198578	5199210	-1	tail assembly protein
			NLS34135.1	HBA78_24585	5199147	5199890	-1	phage tail protein
			NLS34136.1	HBA78_24590	5199896	5200594	-1	phage minor tail protein L
			NLS34137.1	HBA78_24595	5200594	5200950	-1	phage tail protein
			NLS34138.1	HBA78_24600	5200928	5204155	-1	phage tail tape measure protein
			NLS34139.1	HBA78_24605	5204201	5204479	-1	DUF4035 domain-containing protein
			NLS34140.1	HBA78_24610	5204503	5204874	-1	phage tail protein
			NLS34141.1	HBA78_24615	5204889	5205593	-1	phage tail protein
			NLS34142.1	HBA78_24620	5205653	5205997	-1	DUF3168 domain-containing protein
			NLS34143.1	HBA78_24625	5205994	5206443	-1	HK97 gp10 family phage protein
			NLS34144.1	HBA78_24630	5206440	5206778	-1	phage head closure protein
5029090	5037171	8081	NLS31662.1	HBA78_11705	5029090	5029842	1	antitermination protein
			NLS31663.1	HBA78_11710	5030121	5030210	-1	hypothetical protein
				HBA78_11715	5030265	5030477	-1	cold shock-like protein CspF
			NLS31664.1	HBA78_11720	5030778	5030993	1	cold shock-like protein CspB
			NLS31665.1	HBA78_11725	5031746	5031961	1	holin
			NLS31666.1	HBA78_11730	5031966	5032517	1	YdfR family protein
			NLS31667.1	HBA78_11735	5032465	5032725	-1	hypothetical protein
			NLS31668.1	HBA78_11740	5032839	5033372	1	lysozyme
			NLS31669.1	HBA78_11745	5033369	5033866	1	DUF2514 domain-containing protein
			NLS31670.1	HBA78_11750	5034230	5034442	1	cold shock protein CspI
			NLS31671.1	HBA78_11755	5034453	5034641	1	cold-shock protein
			NLS31672.1	HBA78_11760	5034789	5034944	1	hypothetical protein
			NLS31673.1	HBA78_11765	5035117	5035290	1	addiction module toxin, GnsA/GnsB family
			NLS31674.1	HBA78_11770	5035586	5035792	1	hypothetical protein
			NLS31675.1	HBA78_11775	5036043	5036237	-1	DUF3950 domain-containing protein
			NLS31676.1	HBA78_11780	5036665	5037171	1	DNA-packaging protein
			NLS31677.1	HBA78_11785	5037143	5039071	1	phage terminase large subunit family protein
5063584	5075371	11787	NLS34181.1	HBA78_24845	5063584	5064694	-1	RHS repeat protein
				HBA78_21100	5066015	5066293	-1	DUF5462 family protein
				HBA78_21105	5066930	5067629	1	transposase
				HBA78_21110	5067879	5071011	1	hypothetical protein
			NLS33484.1	HBA78_21115	5071534	5071947	1	hypothetical protein
			NLS33485.1	HBA78_21120	5071949	5072731	1	phage integrase family protein
			NLS33486.1	HBA78_21125	5072868	5073143	-1	CopG family transcriptional regulator
			NLS33487.1	HBA78_21130	5073137	5073781	-1	AAA family ATPase
			NLS33488.1	HBA78_21135	5074003	5074974	1	plasmid segregation protein parM
			NLS33489.1	HBA78_21140	5074979	5075371	1	plasmid stability protein
5090884	5096141	5257	NLS33508.1	HBA78_21260	5090884	5091042	1	type I toxin-antitoxin system Hok family toxin
			NLS33509.1	HBA78_21265	5091520	5091708	1	hypothetical protein
			NLS33510.1	HBA78_21270	5091941	5092228	1	hypothetical protein
				HBA78_21275	5092350	5093170	1	DUF945 domain-containing protein
			NLS33511.1	HBA78_21280	5093466	5094056	-1	transglycosylase SLT domain-containing protein
			NLS33512.1	HBA78_21285	5094389	5094772	1	relaxosome protein TraM
			NLS33513.1	HBA78_21290	5094959	5095648	1	conjugal transfer transcriptional regulator TraJ
			NLS33514.1	HBA78_21295	5095746	5096141	1	conjugal transfer relaxosome protein TraY
5132882	5140880	7998	NLS33554.1	HBA78_21515	5132882	5132998	-1	hypothetical protein
			NLS33555.1	HBA78_21520	5133393	5134382	1	AraC family transcriptional regulator
			NLS33556.1	HBA78_21525	5135171	5136823	1	NAD-dependent malic enzyme
			NLS33557.1	HBA78_21530	5136891	5138351	1	anion permease
				HBA78_21535	5138756	5139021	1	IS1 family transposase
				HBA78_21540	5139117	5140221	1	IS4 family transposase
				HBA78_21545	5140245	5140674	1	IS1 family transposase
			NLS33558.1	HBA78_21550	5140692	5140880	-1	hypothetical protein
5144965	5149069	4104	NLS33561.1	HBA78_21565	5144965	5145341	1	DUF5462 family protein
			NLS34073.1	HBA78_24245	5146775	5147902	-1	hypothetical protein
			NLS34074.1	HBA78_24250	5148890	5149069	1	hypothetical protein
5157759	5170558	12799	NLS34080.1	HBA78_24285	5157759	5160215	-1	fimbrial biogenesis outer membrane usher protein
			NLS34081.1	HBA78_24290	5160235	5160978	-1	molecular chaperone
			NLS34082.1	HBA78_24295	5161052	5161363	-1	transcriptional regulator
				HBA78_24300	5162791	5163760	-1	IS110 family transposase
			NLS34083.1	HBA78_24305	5164042	5164986	-1	CAAX protease
			NLS34084.1	HBA78_24310	5165593	5166237	-1	recombinase family protein
			NLS34085.1	HBA78_24315	5166524	5167144	1	ParA family protein
			NLS34086.1	HBA78_24320	5167196	5167426	1	DNA partition complex ParG
			NLS34087.1	HBA78_24325	5167583	5167744	1	ribbon-helix-helix protein, CopG family
			NLS34088.1	HBA78_24330	5167769	5168746	1	hypothetical protein
			NLS34089.1	HBA78_24335	5168743	5169099	-1	DNA distortion polypeptide 3
			NLS34090.1	HBA78_24340	5169236	5169682	-1	hypothetical protein
			NLS34091.1	HBA78_24345	5169722	5170558	-1	replication initiation protein

## Sheet: GenomicIslands K12 NEB DH5alpha
Island start	Island end	Length	Gene name	Locus	Gene start	Gene end	Strand	Product
149715	156201	6486	AOO68560.1	NEB5A_00685	149715	150953	-1	fimbrial protein
			AOO68561.1	NEB5A_00690	151003	151599	-1	fimbrial protein StaF
			AOO68562.1	NEB5A_00695	151626	152228	-1	fimbrial protein StaE
			AOO68563.1	NEB5A_00700	152243	152812	-1	fimbrial protein
			AOO68564.1	NEB5A_00705	152829	155426	-1	outer membrane usher protein
			AOO68565.1	NEB5A_00710	155461	156201	-1	fimbrial chaperone
235365	240716	5351	AOO68631.1	NEB5A_01085	235365	236120	-1	hydroxyacylglutathione hydrolase
			AOO68632.1	NEB5A_01090	236154	236876	1	hypothetical protein
			AOO68633.1	NEB5A_01095	236873	237340	-1	ribonuclease HI
			AOO68634.1	NEB5A_01100	237396	238136	1	DNA polymerase III subunit epsilon
			AOO68635.1	NEB5A_01110	238673	239458	1	hypothetical protein
			AOO68636.1	NEB5A_01115	239595	240074	-1	hypothetical protein
			AOO68637.1	NEB5A_01120	240084	240422	-1	hypothetical protein
			AOO68638.1	NEB5A_01125	240474	240716	1	transposase
266566	279869	13303	AOO68662.1	NEB5A_01280	266566	266907	-1	toxin
			AOO68663.1	NEB5A_01285	266928	267245	-1	antitoxin
			AOO68664.1	NEB5A_01290	267494	267970	-1	hypothetical protein
			AOO68665.1	NEB5A_01295	267986	268444	-1	hypothetical protein
			AOO68666.1	NEB5A_01300	268542	268781	-1	hypothetical protein
			AOO68667.1	NEB5A_01305	268858	269325	-1	hypothetical protein
			AOO68668.1	NEB5A_01310	269348	269791	-1	hypothetical protein
			AOO68669.1	NEB5A_01315	269791	270030	-1	hypothetical protein
			AOO68670.1	NEB5A_01320	270422	271243	-1	hypothetical protein
			AOO68671.1	NEB5A_01325	271335	272198	-1	hypothetical protein
			AOO68672.1	NEB5A_01330	272527	273420	-1	LysR family transcriptional regulator
			AOO68673.1	NEB5A_01335	273516	273884	1	transposase
			AOO68674.1	NEB5A_01340	273841	274992	1	integrase
			AOO68675.1	NEB5A_01345	275068	275493	1	DNA-binding protein
				NEB5A_01350	275423	275791	-1	hypothetical protein
			AOO72579.1	NEB5A_01355	275706	276131	-1	hypothetical protein
				NEB5A_01360	276100	277218	1	hypothetical protein
			AOO68676.1	NEB5A_01365	277339	278319	-1	transposase
			AOO68677.1	NEB5A_01370	278602	278922	1	hypothetical protein
			AOO68678.1	NEB5A_01375	278919	279869	1	acetaldehyde dehydrogenase (acetylating)
			AOO68679.1	NEB5A_01380	279866	280879	1	4-hydroxy-2-oxovalerate aldolase
266566	278319	11753	AOO68662.1	NEB5A_01280	266566	266907	-1	toxin
			AOO68663.1	NEB5A_01285	266928	267245	-1	antitoxin
			AOO68664.1	NEB5A_01290	267494	267970	-1	hypothetical protein
			AOO68665.1	NEB5A_01295	267986	268444	-1	hypothetical protein
			AOO68666.1	NEB5A_01300	268542	268781	-1	hypothetical protein
			AOO68667.1	NEB5A_01305	268858	269325	-1	hypothetical protein
			AOO68668.1	NEB5A_01310	269348	269791	-1	hypothetical protein
			AOO68669.1	NEB5A_01315	269791	270030	-1	hypothetical protein
			AOO68670.1	NEB5A_01320	270422	271243	-1	hypothetical protein
			AOO68671.1	NEB5A_01325	271335	272198	-1	hypothetical protein
			AOO68672.1	NEB5A_01330	272527	273420	-1	LysR family transcriptional regulator
			AOO68673.1	NEB5A_01335	273516	273884	1	transposase
			AOO68674.1	NEB5A_01340	273841	274992	1	integrase
			AOO68675.1	NEB5A_01345	275068	275493	1	DNA-binding protein
				NEB5A_01350	275423	275791	-1	hypothetical protein
			AOO72579.1	NEB5A_01355	275706	276131	-1	hypothetical protein
				NEB5A_01360	276100	277218	1	hypothetical protein
			AOO68676.1	NEB5A_01365	277339	278319	-1	transposase
425008	481264	56256	AOO68816.1	NEB5A_02110	424414	425037	-1	multifunctional acyl-CoA thioesterase I/protease I/lysophospholipase L1
			AOO68817.1	NEB5A_02115	425008	425694	1	ABC transporter ATP-binding protein
			AOO68818.1	NEB5A_02120	425691	428105	1	sugar ABC transporter permease
			AOO68819.1	NEB5A_02125	428536	432816	1	RHS element protein
			AOO68820.1	NEB5A_02130	432856	433224	1	hypothetical protein
			AOO68821.1	NEB5A_02135	433224	433934	1	hypothetical protein
			AOO68822.1	NEB5A_02140	433915	434175	1	hypothetical protein
			AOO68823.1	NEB5A_02145	434920	435291	-1	hypothetical protein
			AOO68824.1	NEB5A_02150	435407	436501	-1	tRNA 2-selenouridine(34) synthase MnmH
			AOO68825.1	NEB5A_02155	436570	437496	-1	transcriptional regulator
			AOO68826.1	NEB5A_02160	437726	438208	1	ureidoglycolate hydrolase
			AOO68827.1	NEB5A_02165	438286	439101	1	transcriptional regulator
			AOO68828.1	NEB5A_02170	439191	440972	1	glyoxylate carboligase
			AOO68829.1	NEB5A_02175	440985	441761	1	hydroxypyruvate isomerase
			AOO68830.1	NEB5A_02180	441861	442739	1	2-hydroxy-3-oxopropionate reductase
			AOO68831.1	NEB5A_02185	442908	444362	1	allantoin permease
			AOO68832.1	NEB5A_02190	444422	445783	1	allantoinase
			AOO68833.1	NEB5A_02195	445840	447141	1	uracil/xanthine transporter
			AOO68834.1	NEB5A_02200	447163	448308	1	glycerate kinase
			AOO68835.1	NEB5A_02205	448536	449321	-1	(S)-ureidoglycine aminohydrolase
			AOO68836.1	NEB5A_02210	449332	450567	-1	allantoate amidohydrolase
			AOO68837.1	NEB5A_02215	450589	451638	-1	ureidoglycolate dehydrogenase
			AOO68838.1	NEB5A_02220	451955	453622	1	acyl-CoA synthetase FdrA
			AOO68839.1	NEB5A_02225	453632	454891	1	hypothetical protein
			AOO68840.1	NEB5A_02230	454902	455717	1	hypothetical protein
			AOO68841.1	NEB5A_02235	455714	456607	1	carbamate kinase
			AOO68842.1	NEB5A_02240	456802	457869	-1	5-(carboxyamino)imidazole ribonucleotide synthase
			AOO68843.1	NEB5A_02245	457866	458375	-1	5-(carboxyamino)imidazole ribonucleotide mutase
			AOO68844.1	NEB5A_02250	458493	459215	-1	UDP-2,3-diacylglucosamine diphosphatase
			AOO68845.1	NEB5A_02255	459218	459712	-1	peptidylprolyl isomerase
			AOO68846.1	NEB5A_02260	459886	461271	1	cysteine--tRNA ligase
			AOO68847.1	NEB5A_02265	461307	461828	-1	hypothetical protein
			AOO68848.1	NEB5A_02270	461936	462148	-1	ribosome-associated protein
			AOO68849.1	NEB5A_02275	462150	463016	-1	bifunctional methylenetetrahydrofolate dehydrogenase/methenyltetrahydrofolate cyclohydrolase
			AOO68850.1	NEB5A_02280	463487	464029	1	fimbrial protein
			AOO68851.1	NEB5A_02285	464249	464941	1	molecular chaperone
			AOO68852.1	NEB5A_02290	464972	467575	1	outer membrane usher protein
			AOO72585.1	NEB5A_02295	467617	468594	1	fimbrial adhesin FimH
			AOO68853.1	NEB5A_02300	468605	469120	1	fimbrial protein
			AOO68854.1	NEB5A_02305	469123	469755	-1	DNA-binding response regulator
			AOO68855.1	NEB5A_02315	470090	471007	-1	integrase
			AOO68856.1	NEB5A_02320	471250	472230	-1	transposase
				NEB5A_02325	472229	472411	1	hypothetical protein
			AOO68857.1	NEB5A_02330	472509	472724	1	holin
			AOO68858.1	NEB5A_02335	472724	473221	1	lysozyme
			AOO68859.1	NEB5A_02340	473218	473679	1	endopeptidase
			AOO68860.1	NEB5A_02345	473711	474004	-1	lipoprotein bor
			AOO68861.1	NEB5A_02350	474295	474705	-1	hypothetical protein
			AOO68862.1	NEB5A_02355	474991	475197	1	hypothetical protein
			AOO68863.1	NEB5A_02360	475362	475556	-1	hypothetical protein
			AOO68864.1	NEB5A_02365	475945	476490	1	protein convertase
			AOO68865.1	NEB5A_02370	476465	477208	1	tail assembly chaperone
			AOO68866.1	NEB5A_02375	477263	477694	-1	SAM-dependent methyltransferase
				NEB5A_02380	477986	478246	1	phage tail protein
			AOO68867.1	NEB5A_02385	478792	479541	1	AraC family transcriptional regulator
			AOO68868.1	NEB5A_02390	479791	480744	-1	protease
			AOO68869.1	NEB5A_02395	481148	481264	-1	hypothetical protein
			AOO68870.1	NEB5A_02400	481258	482019	-1	transcriptional regulator
467617	481264	13647	AOO72585.1	NEB5A_02295	467617	468594	1	fimbrial adhesin FimH
			AOO68853.1	NEB5A_02300	468605	469120	1	fimbrial protein
			AOO68854.1	NEB5A_02305	469123	469755	-1	DNA-binding response regulator
			AOO68855.1	NEB5A_02315	470090	471007	-1	integrase
			AOO68856.1	NEB5A_02320	471250	472230	-1	transposase
				NEB5A_02325	472229	472411	1	hypothetical protein
			AOO68857.1	NEB5A_02330	472509	472724	1	holin
			AOO68858.1	NEB5A_02335	472724	473221	1	lysozyme
			AOO68859.1	NEB5A_02340	473218	473679	1	endopeptidase
			AOO68860.1	NEB5A_02345	473711	474004	-1	lipoprotein bor
			AOO68861.1	NEB5A_02350	474295	474705	-1	hypothetical protein
			AOO68862.1	NEB5A_02355	474991	475197	1	hypothetical protein
			AOO68863.1	NEB5A_02360	475362	475556	-1	hypothetical protein
			AOO68864.1	NEB5A_02365	475945	476490	1	protein convertase
			AOO68865.1	NEB5A_02370	476465	477208	1	tail assembly chaperone
			AOO68866.1	NEB5A_02375	477263	477694	-1	SAM-dependent methyltransferase
				NEB5A_02380	477986	478246	1	phage tail protein
			AOO68867.1	NEB5A_02385	478792	479541	1	AraC family transcriptional regulator
			AOO68868.1	NEB5A_02390	479791	480744	-1	protease
			AOO68869.1	NEB5A_02395	481148	481264	-1	hypothetical protein
			AOO68870.1	NEB5A_02400	481258	482019	-1	transcriptional regulator
623843	634621	10778	AOO68993.1	NEB5A_03075	623843	623932	-1	potassium-transporting ATPase subunit F
			AOO68994.1	NEB5A_03080	624245	624451	1	hypothetical protein
			AOO68995.1	NEB5A_03085	624694	628887	1	RHS element protein
			AOO68996.1	NEB5A_03090	628887	629213	1	hypothetical protein
			AOO68997.1	NEB5A_03095	629331	630764	1	hypothetical protein
			AOO68998.1	NEB5A_03100	630761	631330	1	hypothetical protein
			AOO68999.1	NEB5A_03105	631556	631810	1	transposase
			AOO69000.1	NEB5A_03110	632029	633072	1	hypothetical protein
			AOO69001.1	NEB5A_03115	633203	633964	1	hypothetical protein
			AOO69002.1	NEB5A_03120	634112	634621	1	hypothetical protein
			AOO69003.1	NEB5A_03125	634618	636036	1	deoxyribodipyrimidine photo-lyase
982950	992156	9206	AOO69305.1	NEB5A_04805	982950	984968	-1	poly-beta-1,6-N-acetyl-D-glucosamine N-deacetylase
				NEB5A_04810	984977	986287	-1	poly-beta-1,6 N-acetyl-D-glucosamine export porin PgaA
			AOO69306.1	NEB5A_04815	986434	987414	-1	transposase
				NEB5A_04820	987463	988599	-1	poly-beta-1,6 N-acetyl-D-glucosamine export porin PgaA
			AOO69307.1	NEB5A_04825	989186	990544	1	diguanylate cyclase
			AOO69308.1	NEB5A_04830	990585	991451	-1	transposase
			AOO69309.1	NEB5A_04835	991448	991747	-1	transposase
			AOO69310.1	NEB5A_04840	991833	992156	1	hypothetical protein
			AOO69311.1	NEB5A_04845	992153	993139	1	hypothetical protein
1091614	1119950	28336	AOO69414.1	NEB5A_05410	1091614	1092864	1	NADP-dependent isocitrate dehydrogenase
			AOO69415.1	NEB5A_05415	1093358	1094023	-1	hypothetical protein
			AOO69416.1	NEB5A_05420	1094024	1094719	-1	hypothetical protein
			AOO69417.1	NEB5A_05425	1095186	1096079	1	integrase
			AOO69418.1	NEB5A_05430	1096428	1096727	1	transposase
			AOO69419.1	NEB5A_05435	1096724	1097590	1	transposase
				NEB5A_05440	1097620	1098558	-1	integrase
			AOO69420.1	NEB5A_05445	1098539	1098784	-1	excisionase
			AOO69421.1	NEB5A_05450	1099528	1099836	-1	hypothetical protein
			AOO69422.1	NEB5A_05455	1100011	1100685	-1	repressor
			AOO69423.1	NEB5A_05460	1100776	1100976	1	transcriptional regulator
			AOO69424.1	NEB5A_05465	1101020	1101577	1	hypothetical protein
			AOO69425.1	NEB5A_05470	1101574	1101912	1	hypothetical protein
			AOO69426.1	NEB5A_05475	1101922	1103289	1	hypothetical protein
			AOO69427.1	NEB5A_05480	1103301	1103483	1	hypothetical protein
			AOO69428.1	NEB5A_05485	1103483	1103956	1	hypothetical protein
			AOO69429.1	NEB5A_05490	1103883	1104674	1	hypothetical protein
			AOO69430.1	NEB5A_05495	1104665	1105249	1	hypothetical protein
				NEB5A_05500	1105253	1105879	1	hypothetical protein
				NEB5A_05505	1105917	1106290	1	tail assembly chaperone
				NEB5A_05510	1106262	1106859	-1	phage tail protein
				NEB5A_05515	1107120	1107384	-1	phage tail protein
			AOO69431.1	NEB5A_05520	1107414	1107968	1	DNA-invertase
			AOO69432.1	NEB5A_05525	1108075	1108908	1	restriction endonuclease
			AOO69433.1	NEB5A_05530	1109409	1109732	-1	anti-adapter protein IraM
			AOO69434.1	NEB5A_05535	1110268	1110378	-1	hypothetical protein
			AOO69435.1	NEB5A_05540	1110431	1110835	-1	hypothetical protein
			AOO69436.1	NEB5A_05545	1111056	1111787	-1	helix-turn-helix-type transcriptional regulator
			AOO69437.1	NEB5A_05550	1111992	1113203	-1	diguanylate phosphodiesterase
			AOO69438.1	NEB5A_05555	1113517	1113753	1	two-component-system connector protein YcgZ
			AOO69439.1	NEB5A_05560	1113796	1114068	1	two-component-system connector protein YmgA
			AOO69440.1	NEB5A_05565	1114097	1114363	1	two-component-system connector protein AriR
			AOO69441.1	NEB5A_05570	1114476	1114724	1	hypothetical protein
			AOO69442.1	NEB5A_05575	1115056	1116579	1	hypothetical protein
			AOO69443.1	NEB5A_05580	1116711	1116929	1	hypothetical protein
			AOO69444.1	NEB5A_05585	1116934	1117062	-1	hypothetical protein
			AOO69445.1	NEB5A_05590	1117329	1118849	1	autotransporter outer membrane beta-barrel domain-containing protein
			AOO69446.1	NEB5A_05595	1119057	1119950	1	autotransporter outer membrane beta-barrel domain-containing protein
1093358	1100976	7618	AOO69415.1	NEB5A_05415	1093358	1094023	-1	hypothetical protein
			AOO69416.1	NEB5A_05420	1094024	1094719	-1	hypothetical protein
			AOO69417.1	NEB5A_05425	1095186	1096079	1	integrase
			AOO69418.1	NEB5A_05430	1096428	1096727	1	transposase
			AOO69419.1	NEB5A_05435	1096724	1097590	1	transposase
				NEB5A_05440	1097620	1098558	-1	integrase
			AOO69420.1	NEB5A_05445	1098539	1098784	-1	excisionase
			AOO69421.1	NEB5A_05450	1099528	1099836	-1	hypothetical protein
			AOO69422.1	NEB5A_05455	1100011	1100685	-1	repressor
			AOO69423.1	NEB5A_05460	1100776	1100976	1	transcriptional regulator
1105917	1118849	12932		NEB5A_05505	1105917	1106290	1	tail assembly chaperone
				NEB5A_05510	1106262	1106859	-1	phage tail protein
				NEB5A_05515	1107120	1107384	-1	phage tail protein
			AOO69431.1	NEB5A_05520	1107414	1107968	1	DNA-invertase
			AOO69432.1	NEB5A_05525	1108075	1108908	1	restriction endonuclease
			AOO69433.1	NEB5A_05530	1109409	1109732	-1	anti-adapter protein IraM
			AOO69434.1	NEB5A_05535	1110268	1110378	-1	hypothetical protein
			AOO69435.1	NEB5A_05540	1110431	1110835	-1	hypothetical protein
			AOO69436.1	NEB5A_05545	1111056	1111787	-1	helix-turn-helix-type transcriptional regulator
			AOO69437.1	NEB5A_05550	1111992	1113203	-1	diguanylate phosphodiesterase
			AOO69438.1	NEB5A_05555	1113517	1113753	1	two-component-system connector protein YcgZ
			AOO69439.1	NEB5A_05560	1113796	1114068	1	two-component-system connector protein YmgA
			AOO69440.1	NEB5A_05565	1114097	1114363	1	two-component-system connector protein AriR
			AOO69441.1	NEB5A_05570	1114476	1114724	1	hypothetical protein
			AOO69442.1	NEB5A_05575	1115056	1116579	1	hypothetical protein
			AOO69443.1	NEB5A_05580	1116711	1116929	1	hypothetical protein
			AOO69444.1	NEB5A_05585	1116934	1117062	-1	hypothetical protein
			AOO69445.1	NEB5A_05590	1117329	1118849	1	autotransporter outer membrane beta-barrel domain-containing protein
1207081	1229131	22050	AOO69523.1	NEB5A_06045	1207081	1208274	1	integrase
			AOO69524.1	NEB5A_06050	1208271	1208468	-1	excisionase
			AOO69525.1	NEB5A_06055	1208510	1208749	-1	hypothetical protein
				NEB5A_06060	1208752	1209637	-1	DNA methylase
			AOO69526.1	NEB5A_06065	1209634	1209786	-1	cruciferin
			AOO69527.1	NEB5A_06070	1209783	1210211	-1	regulator
			AOO69528.1	NEB5A_06075	1210208	1210888	-1	exonuclease
			AOO69529.1	NEB5A_06080	1210885	1211802	-1	recombinase RecT
			AOO69530.1	NEB5A_06085	1211812	1212093	-1	hypothetical protein
			AOO69531.1	NEB5A_06090	1212101	1213069	-1	hypothetical protein
			AOO69532.1	NEB5A_06095	1213174	1214010	-1	hypothetical protein
			AOO69533.1	NEB5A_06100	1214021	1214230	-1	cell division protein FtsZ
			AOO69534.1	NEB5A_06105	1214387	1214596	-1	hypothetical protein
			AOO72615.1	NEB5A_06110	1214752	1215045	-1	regulator
			AOO69535.1	NEB5A_06115	1215606	1215815	1	hypothetical protein
			AOO69536.1	NEB5A_06120	1215846	1216712	-1	hypothetical protein
			AOO72616.1	NEB5A_06125	1216849	1217559	-1	repressor
			AOO69537.1	NEB5A_06130	1217677	1217898	1	transcriptional regulator
			AOO69538.1	NEB5A_06135	1217929	1218471	1	regulator
			AOO69539.1	NEB5A_06140	1218557	1219465	1	hypothetical protein
			AOO69540.1	NEB5A_06145	1219462	1220151	1	phage replication protein
				NEB5A_06150	1220215	1220799	1	hypothetical protein
			AOO69541.1	NEB5A_06155	1221155	1221610	1	hypothetical protein
			AOO69542.1	NEB5A_06160	1221610	1221780	1	hypothetical protein
			AOO69543.1	NEB5A_06165	1221777	1222445	1	serine/threonine protein phosphatase
			AOO69544.1	NEB5A_06170	1222438	1223079	1	NinG family protein
			AOO69545.1	NEB5A_06175	1223395	1224204	1	antitermination protein
			AOO69546.1	NEB5A_06180	1224683	1224907	1	lysis protein
			AOO69547.1	NEB5A_06185	1224885	1225379	1	lysozyme
			AOO69548.1	NEB5A_06190	1225376	1225834	1	endopeptidase
			AOO69549.1	NEB5A_06195	1226033	1226551	1	Rha family transcriptional regulator
			AOO69550.1	NEB5A_06200	1226623	1227219	-1	hypothetical protein
			AOO69551.1	NEB5A_06205	1227218	1227448	1	Fur-regulated protein
			AOO69552.1	NEB5A_06210	1227610	1228338	1	Fur-regulated protein
			AOO69553.1	NEB5A_06215	1228586	1229131	1	protein convertase
			AOO69554.1	NEB5A_06220	1229106	1231028	1	terminase
1214021	1227448	13427	AOO69533.1	NEB5A_06100	1214021	1214230	-1	cell division protein FtsZ
			AOO69534.1	NEB5A_06105	1214387	1214596	-1	hypothetical protein
			AOO72615.1	NEB5A_06110	1214752	1215045	-1	regulator
			AOO69535.1	NEB5A_06115	1215606	1215815	1	hypothetical protein
			AOO69536.1	NEB5A_06120	1215846	1216712	-1	hypothetical protein
			AOO72616.1	NEB5A_06125	1216849	1217559	-1	repressor
			AOO69537.1	NEB5A_06130	1217677	1217898	1	transcriptional regulator
			AOO69538.1	NEB5A_06135	1217929	1218471	1	regulator
			AOO69539.1	NEB5A_06140	1218557	1219465	1	hypothetical protein
			AOO69540.1	NEB5A_06145	1219462	1220151	1	phage replication protein
				NEB5A_06150	1220215	1220799	1	hypothetical protein
			AOO69541.1	NEB5A_06155	1221155	1221610	1	hypothetical protein
			AOO69542.1	NEB5A_06160	1221610	1221780	1	hypothetical protein
			AOO69543.1	NEB5A_06165	1221777	1222445	1	serine/threonine protein phosphatase
			AOO69544.1	NEB5A_06170	1222438	1223079	1	NinG family protein
			AOO69545.1	NEB5A_06175	1223395	1224204	1	antitermination protein
			AOO69546.1	NEB5A_06180	1224683	1224907	1	lysis protein
			AOO69547.1	NEB5A_06185	1224885	1225379	1	lysozyme
			AOO69548.1	NEB5A_06190	1225376	1225834	1	endopeptidase
			AOO69549.1	NEB5A_06195	1226033	1226551	1	Rha family transcriptional regulator
			AOO69550.1	NEB5A_06200	1226623	1227219	-1	hypothetical protein
			AOO69551.1	NEB5A_06205	1227218	1227448	1	Fur-regulated protein
1247171	1256931	9760	AOO69564.1	NEB5A_06295	1247171	1248037	1	2-hydroxy-6-oxo-6-phenylhexa-2,4-dienoate hydrolase
			AOO69565.1	NEB5A_06300	1248047	1248280	1	hypothetical protein
			AOO69566.1	NEB5A_06305	1248384	1250480	-1	transposase
			AOO69567.1	NEB5A_06310	1250496	1251047	-1	recombinase
			AOO69568.1	NEB5A_06315	1251211	1254219	1	transposase
				NEB5A_06320	1254250	1254954	-1	hypothetical protein
			AOO69569.1	NEB5A_06325	1255254	1255550	-1	hypothetical protein
			AOO72621.1	NEB5A_06330	1255774	1256493	1	TonB system transport protein TonB
			AOO69570.1	NEB5A_06335	1256533	1256931	-1	acyl-CoA esterase
1248047	1255550	7503	AOO69565.1	NEB5A_06300	1248047	1248280	1	hypothetical protein
			AOO69566.1	NEB5A_06305	1248384	1250480	-1	transposase
			AOO69567.1	NEB5A_06310	1250496	1251047	-1	recombinase
			AOO69568.1	NEB5A_06315	1251211	1254219	1	transposase
				NEB5A_06320	1254250	1254954	-1	hypothetical protein
			AOO69569.1	NEB5A_06325	1255254	1255550	-1	hypothetical protein
1359121	1378870	19749	AOO69666.1	NEB5A_06860	1359121	1359336	-1	hypothetical protein
			AOO69667.1	NEB5A_06865	1359415	1359624	-1	hypothetical protein
			AOO72628.1	NEB5A_06870	1359617	1359811	-1	restriction endonuclease
			AOO69668.1	NEB5A_06875	1359868	1360677	-1	recombination and repair protein RecT
			AOO69669.1	NEB5A_06880	1360670	1363270	-1	exonuclease VIII
			AOO69670.1	NEB5A_06885	1363372	1363647	-1	hypothetical protein
			AOO69671.1	NEB5A_06890	1363722	1363898	-1	hypothetical protein
			AOO69672.1	NEB5A_06895	1363892	1364113	-1	cell division protein FtsZ
			AOO72629.1	NEB5A_06900	1364555	1365043	1	superinfection exclusion protein B
			AOO69673.1	NEB5A_06905	1365040	1365195	-1	DUF1391 domain-containing protein
			AOO69674.1	NEB5A_06910	1365649	1366125	-1	repressor
			AOO69675.1	NEB5A_06915	1366249	1366545	1	transcriptional regulator
			AOO69676.1	NEB5A_06920	1366568	1366990	1	hypothetical protein
			AOO69677.1	NEB5A_06925	1367003	1367860	1	hypothetical protein
			AOO69678.1	NEB5A_06930	1367867	1368613	1	DNA replication protein DnaC
				NEB5A_06935	1368636	1369088	1	hypothetical protein
			AOO69679.1	NEB5A_06940	1369079	1369528	1	endopeptidase
			AOO69680.1	NEB5A_06945	1369666	1371123	1	potassium transporter TrkG
			AOO69681.1	NEB5A_06950	1371261	1371524	1	hypothetical protein
			AOO69682.1	NEB5A_06955	1371505	1371864	1	hypothetical protein
			AOO69683.1	NEB5A_06960	1371972	1372172	1	hypothetical protein
			AOO69684.1	NEB5A_06965	1372338	1373366	1	phage tail tape-measure protein
				NEB5A_06970	1373273	1373488	1	enterobacterial Ail/Lom family protein
			AOO69685.1	NEB5A_06975	1373630	1374610	-1	transposase
				NEB5A_06980	1374680	1374868	1	enterobacterial Ail/Lom family protein
			AOO69686.1	NEB5A_06985	1374869	1375042	-1	hypothetical protein
				NEB5A_06990	1375430	1376227	-1	hypothetical protein
			AOO69687.1	NEB5A_06995	1376298	1378295	1	hypothetical protein
			AOO69688.1	NEB5A_07000	1378295	1378870	1	phage tail protein
1363722	1367860	4138	AOO69671.1	NEB5A_06890	1363722	1363898	-1	hypothetical protein
			AOO69672.1	NEB5A_06895	1363892	1364113	-1	cell division protein FtsZ
			AOO72629.1	NEB5A_06900	1364555	1365043	1	superinfection exclusion protein B
			AOO69673.1	NEB5A_06905	1365040	1365195	-1	DUF1391 domain-containing protein
			AOO69674.1	NEB5A_06910	1365649	1366125	-1	repressor
			AOO69675.1	NEB5A_06915	1366249	1366545	1	transcriptional regulator
			AOO69676.1	NEB5A_06920	1366568	1366990	1	hypothetical protein
			AOO69677.1	NEB5A_06925	1367003	1367860	1	hypothetical protein
1369666	1380108	10442	AOO69680.1	NEB5A_06945	1369666	1371123	1	potassium transporter TrkG
			AOO69681.1	NEB5A_06950	1371261	1371524	1	hypothetical protein
			AOO69682.1	NEB5A_06955	1371505	1371864	1	hypothetical protein
			AOO69683.1	NEB5A_06960	1371972	1372172	1	hypothetical protein
			AOO69684.1	NEB5A_06965	1372338	1373366	1	phage tail tape-measure protein
				NEB5A_06970	1373273	1373488	1	enterobacterial Ail/Lom family protein
			AOO69685.1	NEB5A_06975	1373630	1374610	-1	transposase
				NEB5A_06980	1374680	1374868	1	enterobacterial Ail/Lom family protein
			AOO69686.1	NEB5A_06985	1374869	1375042	-1	hypothetical protein
				NEB5A_06990	1375430	1376227	-1	hypothetical protein
			AOO69687.1	NEB5A_06995	1376298	1378295	1	hypothetical protein
			AOO69688.1	NEB5A_07000	1378295	1378870	1	phage tail protein
			AOO69689.1	NEB5A_07005	1378968	1379558	-1	DNA invertase
			AOO69690.1	NEB5A_07010	1379875	1380108	-1	hypothetical protein
1469191	1477216	8025	AOO69768.1	NEB5A_07420	1469191	1470252	1	hypothetical protein
			AOO69769.1	NEB5A_07425	1470365	1471864	-1	amino acid permease
			AOO69770.1	NEB5A_07430	1472131	1472748	1	glutathione S-transferase
			AOO69771.1	NEB5A_07435	1472824	1473036	1	hypothetical protein
			AOO72631.1	NEB5A_07440	1474023	1475822	1	type IV secretion protein Rhs
			AOO69772.1	NEB5A_07445	1475806	1476288	1	hypothetical protein
			AOO69773.1	NEB5A_07450	1476470	1477216	1	hypothetical protein
1472131	1479169	7038	AOO69770.1	NEB5A_07430	1472131	1472748	1	glutathione S-transferase
			AOO69771.1	NEB5A_07435	1472824	1473036	1	hypothetical protein
			AOO72631.1	NEB5A_07440	1474023	1475822	1	type IV secretion protein Rhs
			AOO69772.1	NEB5A_07445	1475806	1476288	1	hypothetical protein
			AOO69773.1	NEB5A_07450	1476470	1477216	1	hypothetical protein
			AOO69774.1	NEB5A_07455	1477700	1478836	1	hypothetical protein
			AOO69775.1	NEB5A_07460	1478936	1479169	1	4-oxalocrotonate tautomerase
			AOO69776.1	NEB5A_07465	1479166	1479735	-1	hypothetical protein
1525517	1529843	4326	AOO69811.1	NEB5A_07645	1525517	1526674	-1	anaerobic sulfatase maturase
			AOO69812.1	NEB5A_07650	1526726	1528408	-1	sulfatase
			AOO69813.1	NEB5A_07655	1528810	1529571	-1	transcriptional regulator YdeO
			AOO69814.1	NEB5A_07660	1529646	1529843	-1	Two-protein-system connector protein SafA
1532704	1538326	5622	AOO69816.1	NEB5A_07670	1532704	1533618	-1	fimbrial protein
			AOO69817.1	NEB5A_07675	1533677	1534180	-1	fimbrial protein
			AOO69818.1	NEB5A_07680	1534193	1534723	-1	fimbrial protein
				NEB5A_07685	1534737	1535963	-1	fimbrial protein
			AOO69819.1	NEB5A_07690	1536241	1536420	-1	transcriptional regulator
			AOO69820.1	NEB5A_07695	1536738	1538060	-1	serine/threonine protein kinase
			AOO69821.1	NEB5A_07700	1538060	1538326	-1	transcriptional regulator
1581682	1598592	16910	AOO69861.1	NEB5A_07905	1580769	1581731	-1	short-chain fatty acid transporter
			AOO69862.1	NEB5A_07910	1581682	1582251	-1	DNA-packaging protein
			AOO69863.1	NEB5A_07915	1582640	1582873	1	DUF3950 domain-containing protein
			AOO69864.1	NEB5A_07920	1582931	1583341	1	hypothetical protein
			AOO69865.1	NEB5A_07925	1583493	1583666	-1	addiction module toxin, GnsA/GnsB family
			AOO69866.1	NEB5A_07930	1583838	1584014	-1	hypothetical protein
			AOO69867.1	NEB5A_07935	1584339	1584551	-1	cold-shock protein
			AOO69868.1	NEB5A_07940	1584914	1585411	-1	hypothetical protein
			AOO69869.1	NEB5A_07945	1585408	1585941	-1	lysozyme
			AOO69870.1	NEB5A_07950	1585938	1586249	-1	hypothetical protein
			AOO69871.1	NEB5A_07955	1586254	1586469	-1	holin
			AOO69872.1	NEB5A_07960	1587223	1587438	-1	cold-shock protein
			AOO69873.1	NEB5A_07965	1587739	1587951	1	cold-shock protein
			AOO69874.1	NEB5A_07970	1588373	1589125	-1	antitermination protein
			AOO69875.1	NEB5A_07975	1589139	1590188	-1	hypothetical protein
			AOO69876.1	NEB5A_07980	1590190	1590468	-1	hypothetical protein
			AOO69877.1	NEB5A_07985	1590535	1590786	-1	hypothetical protein
			AOO69878.1	NEB5A_07990	1591003	1591158	-1	hypothetical protein
			AOO69879.1	NEB5A_07995	1591230	1591517	-1	addiction module toxin RelE
			AOO69880.1	NEB5A_08000	1591517	1591756	-1	bifunctional antitoxin/transcriptional repressor RelB
			AOO69881.1	NEB5A_08005	1592289	1592621	1	protein flxA
			AOO69882.1	NEB5A_08010	1593006	1593233	-1	hypothetical protein
			AOO69883.1	NEB5A_08015	1593230	1593520	-1	hypothetical protein
			AOO69884.1	NEB5A_08020	1593504	1593734	-1	transcriptional regulator
			AOO69885.1	NEB5A_08025	1593818	1594225	1	transcriptional regulator
			AOO69886.1	NEB5A_08030	1594392	1594547	1	DUF1391 domain-containing protein
			AOO69887.1	NEB5A_08035	1594707	1594925	1	hypothetical protein
			AOO72633.1	NEB5A_08040	1594929	1595222	-1	hypothetical protein
			AOO69888.1	NEB5A_08045	1595493	1595681	1	cell division inhibition protein DicB
			AOO69889.1	NEB5A_08050	1595678	1595869	1	DUF1482 domain-containing protein
			AOO69890.1	NEB5A_08055	1596181	1596492	-1	hypothetical protein
				NEB5A_08060	1596696	1597421	1	transposase
			AOO69891.1	NEB5A_08065	1597396	1598592	1	integrase
2003165	2010774	7609	AOO70279.1	NEB5A_10165	2003165	2003881	1	hypothetical protein
			AOO70280.1	NEB5A_10175	2004510	2005964	-1	FMN/FAD transporter
			AOO70281.1	NEB5A_10185	2006271	2007221	-1	transcriptional regulator Cbl
			AOO70282.1	NEB5A_10190	2007323	2008240	-1	nitrogen assimilation transcriptional regulator
			AOO70283.1	NEB5A_10200	2008698	2009630	-1	L,D-transpeptidase
			AOO70284.1	NEB5A_10205	2009695	2010774	-1	nicotinate-nucleotide--dimethylbenzimidazole phosphoribosyltransferase
2008698	2025668	16970	AOO70283.1	NEB5A_10200	2008698	2009630	-1	L,D-transpeptidase
			AOO70284.1	NEB5A_10205	2009695	2010774	-1	nicotinate-nucleotide--dimethylbenzimidazole phosphoribosyltransferase
			AOO70285.1	NEB5A_10210	2010786	2011529	-1	adenosylcobinamide-GDP ribazoletransferase
			AOO70286.1	NEB5A_10215	2011526	2012071	-1	bifunctional adenosylcobinamide kinase/adenosylcobinamide-phosphate guanylyltransferase
			AOO70287.1	NEB5A_10220	2012612	2013592	-1	transposase
			AOO70288.1	NEB5A_10225	2013735	2013899	-1	hypothetical protein
			AOO70289.1	NEB5A_10230	2015259	2016164	-1	transposase
			AOO70290.1	NEB5A_10235	2016122	2016487	-1	IS2 repressor TnpA
			AOO70291.1	NEB5A_10240	2016551	2016811	1	TonB-dependent receptor
			AOO70292.1	NEB5A_10245	2016808	2017518	1	hypothetical protein
			AOO70293.1	NEB5A_10250	2017846	2020965	1	hypothetical protein
				NEB5A_10255	2021086	2022647	1	hypothetical protein
			AOO72652.1	NEB5A_10260	2022615	2023061	1	hypothetical protein
			AOO70294.1	NEB5A_10265	2023124	2023345	1	hypothetical protein
			AOO70295.1	NEB5A_10270	2023419	2023787	1	antitoxin
			AOO70296.1	NEB5A_10275	2023876	2024250	1	toxin
			AOO70297.1	NEB5A_10280	2024247	2024441	1	hypothetical protein
			AOO72653.1	NEB5A_10285	2024454	2024567	1	hypothetical protein
			AOO72654.1	NEB5A_10290	2025056	2025238	1	ethanolamine utilization protein
			AOO70298.1	NEB5A_10295	2025339	2025668	-1	hypothetical protein
2011526	2016811	5285	AOO70285.1	NEB5A_10210	2010786	2011529	-1	adenosylcobinamide-GDP ribazoletransferase
			AOO70286.1	NEB5A_10215	2011526	2012071	-1	bifunctional adenosylcobinamide kinase/adenosylcobinamide-phosphate guanylyltransferase
			AOO70287.1	NEB5A_10220	2012612	2013592	-1	transposase
			AOO70288.1	NEB5A_10225	2013735	2013899	-1	hypothetical protein
			AOO70289.1	NEB5A_10230	2015259	2016164	-1	transposase
			AOO70290.1	NEB5A_10235	2016122	2016487	-1	IS2 repressor TnpA
			AOO70291.1	NEB5A_10240	2016551	2016811	1	TonB-dependent receptor
			AOO70292.1	NEB5A_10245	2016808	2017518	1	hypothetical protein
2044754	2059367	14613	AOO70318.1	NEB5A_10400	2044754	2045920	-1	UDP-glucose 6-dehydrogenase
			AOO70319.1	NEB5A_10405	2046169	2047575	-1	phosphogluconate dehydrogenase (NADP(+)-dependent, decarboxylating)
			AOO70320.1	NEB5A_10410	2048202	2049182	-1	transposase
				NEB5A_10415	2049247	2049696	-1	rhamnosyltransferase
			AOO70321.1	NEB5A_10420	2049698	2050816	-1	glycosyltransferase
			AOO70322.1	NEB5A_10425	2050801	2051391	-1	acetyltransferase
			AOO70323.1	NEB5A_10430	2051372	2052364	-1	beta-1,6-galactofuranosyltransferase
			AOO70324.1	NEB5A_10435	2052367	2053533	-1	polymerase
			AOO70325.1	NEB5A_10440	2053533	2054636	-1	UDP-galactopyranose mutase
			AOO70326.1	NEB5A_10445	2054644	2055891	-1	O-unit flippase Wzx
			AOO70327.1	NEB5A_10450	2055888	2056445	-1	dTDP-4-dehydrorhamnose 3,5-epimerase
			AOO70328.1	NEB5A_10455	2056445	2057326	-1	glucose-1-phosphate thymidylyltransferase
				NEB5A_10460	2057384	2058282	-1	dTDP-4-dehydrorhamnose reductase
			AOO70329.1	NEB5A_10465	2058282	2059367	-1	dTDP-glucose 4,6-dehydratase
2048202	2059367	11165	AOO70320.1	NEB5A_10410	2048202	2049182	-1	transposase
				NEB5A_10415	2049247	2049696	-1	rhamnosyltransferase
			AOO70321.1	NEB5A_10420	2049698	2050816	-1	glycosyltransferase
			AOO70322.1	NEB5A_10425	2050801	2051391	-1	acetyltransferase
			AOO70323.1	NEB5A_10430	2051372	2052364	-1	beta-1,6-galactofuranosyltransferase
			AOO70324.1	NEB5A_10435	2052367	2053533	-1	polymerase
			AOO70325.1	NEB5A_10440	2053533	2054636	-1	UDP-galactopyranose mutase
			AOO70326.1	NEB5A_10445	2054644	2055891	-1	O-unit flippase Wzx
			AOO70327.1	NEB5A_10450	2055888	2056445	-1	dTDP-4-dehydrorhamnose 3,5-epimerase
			AOO70328.1	NEB5A_10455	2056445	2057326	-1	glucose-1-phosphate thymidylyltransferase
				NEB5A_10460	2057384	2058282	-1	dTDP-4-dehydrorhamnose reductase
			AOO70329.1	NEB5A_10465	2058282	2059367	-1	dTDP-glucose 4,6-dehydratase
2134463	2140299	5836	AOO70393.1	NEB5A_10795	2134463	2134801	1	heavy metal resistance protein
			AOO70394.1	NEB5A_10800	2134883	2135917	-1	adhesin
			AOO70395.1	NEB5A_10805	2135933	2138413	-1	fimbrial assembly protein
			AOO70396.1	NEB5A_10810	2138429	2139103	-1	fimbrial assembly protein
			AOO70397.1	NEB5A_10815	2139183	2139725	-1	hypothetical protein
				NEB5A_10820	2139914	2140094	1	hypothetical protein
			AOO70398.1	NEB5A_10825	2140018	2140299	-1	hypothetical protein
2330106	2337354	7248	AOO70556.1	NEB5A_11660	2330106	2331314	1	deubiquitinase
			AOO70557.1	NEB5A_11665	2331385	2333112	-1	hypothetical protein
			AOO70558.1	NEB5A_11670	2333250	2334221	1	hypothetical protein
			AOO70559.1	NEB5A_11675	2334324	2334827	1	hypothetical protein
			AOO70560.1	NEB5A_11680	2335100	2335816	-1	hypothetical protein
			AOO70561.1	NEB5A_11685	2336025	2336447	1	hypothetical protein
			AOO70562.1	NEB5A_11690	2336506	2337354	1	hypothetical protein
2411642	2423568	11926	AOO70631.1	NEB5A_12045	2411642	2412397	-1	phospholipid-binding lipoprotein MlaA
			AOO70632.1	NEB5A_12050	2412691	2413623	1	hypothetical protein
			AOO70633.1	NEB5A_12060	2413935	2415092	1	integrase
			AOO70634.1	NEB5A_12065	2415245	2415607	1	translocase
			AOO70635.1	NEB5A_12070	2415604	2416524	1	bactoprenol glucosyl transferase
			AOO70636.1	NEB5A_12075	2416521	2417852	1	hypothetical protein
			AOO70637.1	NEB5A_12080	2418151	2418495	1	tail assembly chaperone
			AOO70638.1	NEB5A_12085	2418467	2418907	-1	tail fiber assembly protein
			AOO70639.1	NEB5A_12090	2418934	2419569	-1	hypothetical protein
			AOO70640.1	NEB5A_12095	2419502	2419777	-1	phage N-6-adenine-methyltransferase
			AOO70641.1	NEB5A_12100	2419777	2420265	-1	hypothetical protein
			AOO70642.1	NEB5A_12105	2420268	2421023	-1	replication protein
			AOO70643.1	NEB5A_12110	2420994	2421356	1	hypothetical protein
			AOO70644.1	NEB5A_12115	2421422	2422246	1	hypothetical protein
			AOO70645.1	NEB5A_12120	2422374	2422910	1	hypothetical protein
			AOO70646.1	NEB5A_12125	2422901	2423263	1	hypothetical protein
			AOO70647.1	NEB5A_12130	2423263	2423568	1	hypothetical protein
2413935	2419569	5634	AOO70633.1	NEB5A_12060	2413935	2415092	1	integrase
			AOO70634.1	NEB5A_12065	2415245	2415607	1	translocase
			AOO70635.1	NEB5A_12070	2415604	2416524	1	bactoprenol glucosyl transferase
			AOO70636.1	NEB5A_12075	2416521	2417852	1	hypothetical protein
			AOO70637.1	NEB5A_12080	2418151	2418495	1	tail assembly chaperone
			AOO70638.1	NEB5A_12085	2418467	2418907	-1	tail fiber assembly protein
			AOO70639.1	NEB5A_12090	2418934	2419569	-1	hypothetical protein
			AOO70640.1	NEB5A_12095	2419502	2419777	-1	phage N-6-adenine-methyltransferase
2428028	2437576	9548	AOO70652.1	NEB5A_12155	2428028	2429566	-1	multidrug resistance protein B
			AOO70653.1	NEB5A_12160	2429566	2430729	-1	multidrug export protein EmrA
			AOO70654.1	NEB5A_12165	2431145	2431759	1	DNA-binding response regulator
			AOO72663.1	NEB5A_12170	2431974	2435357	1	two-component system sensor histidine kinase EvgS
			AOO70655.1	NEB5A_12175	2435413	2436558	-1	CoA:oxalate CoA-transferase
			AOO70656.1	NEB5A_12180	2436632	2437576	-1	transporter YfdV
2689419	2737394	47975	AOO72674.1	NEB5A_13405	2689419	2690660	1	magnesium/cobalt efflux protein
			AOO70879.1	NEB5A_13410	2690715	2691308	-1	nucleotide exchange factor GrpE
			AOO70880.1	NEB5A_13415	2691305	2691442	-1	molecular chaperone GrpE
			AOO70881.1	NEB5A_13420	2691431	2692309	1	NAD(+) kinase
			AOO70882.1	NEB5A_13425	2692395	2694056	1	DNA repair protein RecN
			AOO70883.1	NEB5A_13430	2694205	2694546	1	outer membrane protein assembly factor BamE
			AOO70884.1	NEB5A_13435	2694608	2694898	-1	RnfH family protein
			AOO72675.1	NEB5A_13440	2694888	2695325	-1	ubiquinone-binding protein
			AOO70885.1	NEB5A_13445	2695496	2695978	1	SsrA-binding protein
			AOO70886.1	NEB5A_13455	2696759	2698000	1	integrase
			AOO72676.1	NEB5A_13460	2698244	2699119	-1	hypothetical protein
			AOO70887.1	NEB5A_13465	2699244	2699456	1	hypothetical protein
			AOO70888.1	NEB5A_13470	2699585	2700994	1	hypothetical protein
			AOO70889.1	NEB5A_13475	2701147	2701773	1	hypothetical protein
			AOO70890.1	NEB5A_13480	2701951	2704140	-1	hypothetical protein
			AOO70891.1	NEB5A_13485	2704137	2705753	-1	hypothetical protein
			AOO70892.1	NEB5A_13490	2706121	2706384	-1	hypothetical protein
			AOO70893.1	NEB5A_13495	2706526	2707599	1	mRNA endoribonuclease LS
			AOO70894.1	NEB5A_13500	2707592	2707963	1	antitoxin RnlB
			AOO70895.1	NEB5A_13505	2708318	2709181	1	hypothetical protein
			AOO70896.1	NEB5A_13510	2709273	2710094	1	hypothetical protein
			AOO70897.1	NEB5A_13515	2710311	2711012	1	transcriptional regulator
			AOO70898.1	NEB5A_13520	2711053	2711289	1	hypothetical protein
			AOO70899.1	NEB5A_13525	2711289	2711732	1	hypothetical protein
			AOO70900.1	NEB5A_13530	2711756	2712223	1	hypothetical protein
			AOO70901.1	NEB5A_13535	2712448	2712762	-1	arsenate reductase
				NEB5A_13540	2712775	2713790	-1	arsenic transporter
			AOO70902.1	NEB5A_13545	2713926	2715629	1	hypothetical protein
			AOO70903.1	NEB5A_13550	2716527	2716985	1	hypothetical protein
			AOO70904.1	NEB5A_13555	2716994	2717476	1	hypothetical protein
			AOO70905.1	NEB5A_13560	2717723	2718040	1	antitoxin
			AOO70906.1	NEB5A_13565	2718061	2718390	1	toxin
			AOO70907.1	NEB5A_13570	2718754	2723055	-1	autotransporter outer membrane beta-barrel domain-containing protein
			AOO70908.1	NEB5A_13575	2724246	2725037	-1	hypothetical protein
			AOO70909.1	NEB5A_13580	2725137	2725619	-1	hypothetical protein
			AOO70910.1	NEB5A_13590	2727356	2728042	1	alpha-mannosidase
			AOO70911.1	NEB5A_13595	2728055	2728846	1	alpha-amylase
			AOO70912.1	NEB5A_13600	2728985	2729257	1	hypothetical protein
			AOO70913.1	NEB5A_13605	2729593	2730570	1	carbon starvation induced protein
			AOO70914.1	NEB5A_13610	2730590	2731858	1	hydroxyglutarate oxidase
			AOO70915.1	NEB5A_13615	2731881	2733329	1	succinate-semialdehyde dehydrogenase I
			AOO70916.1	NEB5A_13620	2733343	2734623	1	4-aminobutyrate--2-oxoglutarate transaminase
			AOO70917.1	NEB5A_13625	2734861	2736261	1	GABA permease
			AOO70918.1	NEB5A_13630	2736282	2736944	1	transcriptional regulator
			AOO70919.1	NEB5A_13635	2736945	2737394	-1	peptidoglycan-binding protein LysM
2696759	2707963	11204	AOO70886.1	NEB5A_13455	2696759	2698000	1	integrase
			AOO72676.1	NEB5A_13460	2698244	2699119	-1	hypothetical protein
			AOO70887.1	NEB5A_13465	2699244	2699456	1	hypothetical protein
			AOO70888.1	NEB5A_13470	2699585	2700994	1	hypothetical protein
			AOO70889.1	NEB5A_13475	2701147	2701773	1	hypothetical protein
			AOO70890.1	NEB5A_13480	2701951	2704140	-1	hypothetical protein
			AOO70891.1	NEB5A_13485	2704137	2705753	-1	hypothetical protein
			AOO70892.1	NEB5A_13490	2706121	2706384	-1	hypothetical protein
			AOO70893.1	NEB5A_13495	2706526	2707599	1	mRNA endoribonuclease LS
			AOO70894.1	NEB5A_13500	2707592	2707963	1	antitoxin RnlB
2711756	2718390	6634	AOO70900.1	NEB5A_13530	2711756	2712223	1	hypothetical protein
			AOO70901.1	NEB5A_13535	2712448	2712762	-1	arsenate reductase
				NEB5A_13540	2712775	2713790	-1	arsenic transporter
			AOO70902.1	NEB5A_13545	2713926	2715629	1	hypothetical protein
			AOO70903.1	NEB5A_13550	2716527	2716985	1	hypothetical protein
			AOO70904.1	NEB5A_13555	2716994	2717476	1	hypothetical protein
			AOO70905.1	NEB5A_13560	2717723	2718040	1	antitoxin
			AOO70906.1	NEB5A_13565	2718061	2718390	1	toxin
2724246	2729257	5011	AOO70908.1	NEB5A_13575	2724246	2725037	-1	hypothetical protein
			AOO70909.1	NEB5A_13580	2725137	2725619	-1	hypothetical protein
			AOO70910.1	NEB5A_13590	2727356	2728042	1	alpha-mannosidase
			AOO70911.1	NEB5A_13595	2728055	2728846	1	alpha-amylase
			AOO70912.1	NEB5A_13600	2728985	2729257	1	hypothetical protein
2819176	2827826	8650	AOO72682.1	NEB5A_14085	2819176	2819460	-1	type I-E CRISPR-associated endoribonuclease Cas2
			AOO70997.1	NEB5A_14090	2819462	2820379	-1	subtype I-E CRISPR-associated endonuclease Cas1
			AOO70998.1	NEB5A_14095	2820395	2820994	-1	type I-E CRISPR-associated protein Cas6/Cse3/CasE
			AOO70999.1	NEB5A_14100	2820981	2821655	-1	type I-E CRISPR-associated protein Cas5/CasD
			AOO71000.1	NEB5A_14105	2821658	2822749	-1	type I-E CRISPR-associated protein Cas7/Cse4/CasC
			AOO71001.1	NEB5A_14110	2822762	2823244	-1	type I-E CRISPR-associated protein Cse2/CasB
			AOO71002.1	NEB5A_14115	2823237	2824745	-1	type I-E CRISPR-associated protein Cse1/CasA
			AOO71003.1	NEB5A_14120	2825160	2827826	-1	CRISPR-associated helicase/endonuclease Cas3
2923834	2939374	15540	AOO71084.1	NEB5A_14545	2923834	2924670	-1	5-dehydro-4-deoxy-D-glucuronate isomerase
			AOO71085.1	NEB5A_14550	2924957	2926138	-1	acetyl-CoA acetyltransferase
			AOO71086.1	NEB5A_14555	2926393	2927622	1	transporter
			AOO72684.1	NEB5A_14560	2928082	2928714	1	hypothetical protein
			AOO71087.1	NEB5A_14565	2929048	2929857	1	hypothetical protein
			AOO71088.1	NEB5A_14570	2929850	2930332	1	hypothetical protein
			AOO71089.1	NEB5A_14575	2930481	2930906	-1	hypothetical protein
				NEB5A_14580	2931100	2931589	1	hypothetical protein
			AOO71090.1	NEB5A_14585	2931814	2932305	1	CesD/SycD/LcrH family type III secretion system chaperone
			AOO71091.1	NEB5A_14590	2932640	2934016	1	transcriptional regulator
			AOO71092.1	NEB5A_14595	2934184	2934402	1	hypothetical protein
			AOO71093.1	NEB5A_14600	2934587	2934961	1	lytic transglycosylase
			AOO71094.1	NEB5A_14605	2935006	2935452	-1	helix-turn-helix transcriptional regulator
			AOO71095.1	NEB5A_14610	2935483	2935638	-1	hypothetical protein
			AOO71096.1	NEB5A_14615	2935860	2936291	-1	hypothetical protein
			AOO71097.1	NEB5A_14620	2936294	2936566	-1	hypothetical protein
			AOO72685.1	NEB5A_14625	2936508	2936663	-1	secretion protein
			AOO71098.1	NEB5A_14630	2936918	2937823	-1	transposase
			AOO71099.1	NEB5A_14635	2937781	2938146	-1	IS2 repressor TnpA
			AOO71100.1	NEB5A_14640	2938235	2938513	-1	hypothetical protein
			AOO71101.1	NEB5A_14645	2938580	2939374	-1	hypothetical protein
2928082	2939374	11292	AOO72684.1	NEB5A_14560	2928082	2928714	1	hypothetical protein
			AOO71087.1	NEB5A_14565	2929048	2929857	1	hypothetical protein
			AOO71088.1	NEB5A_14570	2929850	2930332	1	hypothetical protein
			AOO71089.1	NEB5A_14575	2930481	2930906	-1	hypothetical protein
				NEB5A_14580	2931100	2931589	1	hypothetical protein
			AOO71090.1	NEB5A_14585	2931814	2932305	1	CesD/SycD/LcrH family type III secretion system chaperone
			AOO71091.1	NEB5A_14590	2932640	2934016	1	transcriptional regulator
			AOO71092.1	NEB5A_14595	2934184	2934402	1	hypothetical protein
			AOO71093.1	NEB5A_14600	2934587	2934961	1	lytic transglycosylase
			AOO71094.1	NEB5A_14605	2935006	2935452	-1	helix-turn-helix transcriptional regulator
			AOO71095.1	NEB5A_14610	2935483	2935638	-1	hypothetical protein
			AOO71096.1	NEB5A_14615	2935860	2936291	-1	hypothetical protein
			AOO71097.1	NEB5A_14620	2936294	2936566	-1	hypothetical protein
			AOO72685.1	NEB5A_14625	2936508	2936663	-1	secretion protein
			AOO71098.1	NEB5A_14630	2936918	2937823	-1	transposase
			AOO71099.1	NEB5A_14635	2937781	2938146	-1	IS2 repressor TnpA
			AOO71100.1	NEB5A_14640	2938235	2938513	-1	hypothetical protein
			AOO71101.1	NEB5A_14645	2938580	2939374	-1	hypothetical protein
3124359	3131176	6817	AOO71268.1	NEB5A_15545	3124359	3125012	-1	3,4-dihydroxy-2-butanone-4-phosphate synthase
			AOO71269.1	NEB5A_15550	3125386	3125676	1	hypothetical protein
			AOO71270.1	NEB5A_15555	3125960	3126511	1	fimbrial protein
			AOO71271.1	NEB5A_15560	3126733	3127098	1	IS2 repressor TnpA
			AOO71272.1	NEB5A_15565	3127056	3127961	1	transposase
			AOO71273.1	NEB5A_15570	3127946	3130411	1	fimbrial protein
			AOO71274.1	NEB5A_15575	3130427	3131176	1	fimbrial assembly protein
3126733	3133383	6650	AOO71271.1	NEB5A_15560	3126733	3127098	1	IS2 repressor TnpA
			AOO71272.1	NEB5A_15565	3127056	3127961	1	transposase
			AOO71273.1	NEB5A_15570	3127946	3130411	1	fimbrial protein
			AOO71274.1	NEB5A_15575	3130427	3131176	1	fimbrial assembly protein
			AOO71275.1	NEB5A_15580	3131178	3132242	1	hypothetical protein
			AOO71276.1	NEB5A_15585	3132285	3132485	-1	glycogen synthesis protein GlgS
			AOO71277.1	NEB5A_15590	3132754	3133383	1	hypothetical protein
3301721	3308187	6466	AOO71423.1	NEB5A_16420	3301721	3302485	1	glutamate synthase operon protein GltF
			AOO71424.1	NEB5A_16425	3302657	3303331	1	fimbrial chaperone protein
			AOO71425.1	NEB5A_16430	3303352	3305733	1	fimbrial protein
				NEB5A_16435	3305730	3306098	1	hypothetical protein
			AOO71426.1	NEB5A_16440	3306247	3307227	-1	transposase
			AOO71427.1	NEB5A_16445	3307226	3307474	1	hypothetical protein
			AOO71428.1	NEB5A_16450	3307471	3308187	1	hypothetical protein
3737494	3748644	11150	AOO71829.1	NEB5A_18575	3737494	3738753	1	ligase
			AOO71830.1	NEB5A_18580	3738785	3739858	-1	lipopolysaccharide 1,2-N-acetylglucosaminetransferase
			AOO71831.1	NEB5A_18585	3739891	3740742	-1	3-deoxy-D-manno-oct-2-ulosonate III transferase WaaZ
			AOO71832.1	NEB5A_18590	3740813	3741511	-1	heptose kinase
			AOO71833.1	NEB5A_18595	3741529	3742545	-1	lipopolysaccharide 1,2-glucosyltransferase
			AOO71834.1	NEB5A_18600	3742585	3743604	-1	lipopolysaccharide 1,3-galactosyltransferase
			AOO71835.1	NEB5A_18605	3743604	3744683	-1	glycosyl transferase
			AOO71836.1	NEB5A_18610	3744727	3745662	-1	lipopolysaccharide biosynthesis protein
			AOO71837.1	NEB5A_18615	3745699	3746496	-1	lipopolysaccharide core heptose(I) kinase RfaP
			AOO71838.1	NEB5A_18620	3746489	3747613	-1	glucosyltransferase I RfaG
			AOO71839.1	NEB5A_18625	3747610	3748644	-1	lipopolysaccharide core heptosyltransferase RfaQ
3817614	3825399	7785	AOO71908.1	NEB5A_18985	3817614	3818012	-1	hypothetical protein
			AOO71909.1	NEB5A_18990	3818032	3818232	-1	hypothetical protein
			AOO71910.1	NEB5A_18995	3818252	3820666	-1	DNA gyrase subunit B
			AOO71911.1	NEB5A_19000	3820695	3821768	-1	DNA replication/repair protein RecF
			AOO71912.1	NEB5A_19005	3821768	3822868	-1	DNA polymerase III subunit beta
			AOO71913.1	NEB5A_19010	3822873	3824276	-1	chromosomal replication initiation protein DnaA
			AOO71914.1	NEB5A_19015	3824883	3825023	1	50S ribosomal protein L34
			AOO71915.1	NEB5A_19020	3825040	3825399	1	ribonuclease P protein component
			AOO71916.1	NEB5A_19025	3825363	3825620	1	membrane protein insertion efficiency factor YidD
				NEB5A_20570	4148032	4148217	-1	hypothetical protein
			AOO72733.1	NEB5A_20575	4148151	4148354	-1	hypothetical protein
			AOO72182.1	NEB5A_20600	4153780	4154163	1	hypothetical protein
			AOO72183.1	NEB5A_20605	4154226	4154669	-1	acetyltransferase
4413610	4418462	4852	AOO72412.1	NEB5A_21840	4413610	4413744	-1	pyrBI operon leader peptide
			AOO72742.1	NEB5A_21845	4413724	4414056	1	hypothetical protein
			AOO72413.1	NEB5A_21850	4414025	4414420	-1	hypothetical protein
			AOO72414.1	NEB5A_21855	4414551	4415264	-1	oxidoreductase
			AOO72415.1	NEB5A_21860	4415335	4415928	1	TetR family transcriptional regulator
			AOO72416.1	NEB5A_21865	4416073	4416525	1	toxin-antitoxin biofilm protein TabA
			AOO72417.1	NEB5A_21870	4416648	4418462	1	hypothetical protein
			AOO72434.1	NEB5A_21960	4437961	4439151	1	integrase
			AOO72435.1	NEB5A_21965	4439483	4439848	1	IS2 repressor TnpA
			AOO72436.1	NEB5A_21970	4439806	4440711	1	transposase
				NEB5A_21975	4440888	4442002	-1	phosphoethanolamine transferase YjgX
			AOO72437.1	NEB5A_21980	4442269	4442439	1	hypothetical protein
			AOO72438.1	NEB5A_21985	4442493	4442714	1	hypothetical protein
			AOO72439.1	NEB5A_21990	4443143	4443286	1	hypothetical protein
4439806	4493671	53865	AOO72435.1	NEB5A_21965	4439483	4439848	1	IS2 repressor TnpA
			AOO72436.1	NEB5A_21970	4439806	4440711	1	transposase
				NEB5A_21975	4440888	4442002	-1	phosphoethanolamine transferase YjgX
			AOO72437.1	NEB5A_21980	4442269	4442439	1	hypothetical protein
			AOO72438.1	NEB5A_21985	4442493	4442714	1	hypothetical protein
			AOO72439.1	NEB5A_21990	4443143	4443286	1	hypothetical protein
			AOO72440.1	NEB5A_21995	4443314	4444642	-1	transposase
			AOO72441.1	NEB5A_22000	4445269	4446486	1	transporter
			AOO72743.1	NEB5A_22005	4446498	4447616	1	oxidoreductase
			AOO72442.1	NEB5A_22010	4447837	4448094	-1	hypothetical protein
			AOO72443.1	NEB5A_22015	4448117	4448320	1	hypothetical protein
			AOO72444.1	NEB5A_22020	4448408	4448674	1	transposase
			AOO72445.1	NEB5A_22025	4448677	4449828	-1	integrase
			AOO72446.1	NEB5A_22030	4449785	4450153	-1	transposase
				NEB5A_22035	4450169	4451004	1	transposase
			AOO72447.1	NEB5A_22040	4451087	4451344	1	hypothetical protein
			AOO72448.1	NEB5A_22045	4451901	4452668	-1	ferric citrate ABC transporter ATP-binding protein FecE
			AOO72449.1	NEB5A_22050	4452669	4453625	-1	iron-dicitrate transporter subunit FecD
			AOO72450.1	NEB5A_22055	4453622	4454620	-1	iron-dicitrate transporter permease subunit
			AOO72451.1	NEB5A_22060	4454617	4455519	-1	iron-dicitrate transporter substrate-binding subunit
			AOO72452.1	NEB5A_22065	4455564	4457888	-1	transporter
			AOO72453.1	NEB5A_22070	4457975	4458928	-1	iron dicitrate transport regulator FecR
			AOO72454.1	NEB5A_22075	4458925	4459446	-1	RNA polymerase subunit sigma
			AOO72455.1	NEB5A_22080	4459657	4459857	-1	hypothetical protein
			AOO72744.1	NEB5A_22085	4460040	4460225	1	transposase
			AOO72456.1	NEB5A_22090	4460226	4460435	1	transposase
			AOO72457.1	NEB5A_22095	4460549	4461535	-1	transcriptional regulator
			AOO72458.1	NEB5A_22100	4461635	4461805	-1	hypothetical protein
			AOO72459.1	NEB5A_22105	4461882	4463231	-1	gluconate permease
			AOO72460.1	NEB5A_22110	4463338	4465305	-1	dehydratase
			AOO72461.1	NEB5A_22115	4465316	4466251	-1	dihydrodipicolinate synthase family protein
			AOO72462.1	NEB5A_22120	4466226	4467014	-1	IclR family transcriptional regulator
			AOO72463.1	NEB5A_22125	4467317	4468099	-1	transcriptional regulator
			AOO72464.1	NEB5A_22130	4468116	4468748	-1	epimerase
			AOO72465.1	NEB5A_22135	4468760	4469191	-1	PTS sugar transporter subunit IIA
			AOO72466.1	NEB5A_22140	4469322	4470128	-1	SgcQ protein
			AOO72467.1	NEB5A_22145	4470141	4471454	-1	permease
			AOO72468.1	NEB5A_22150	4471466	4471744	-1	PTS sugar transporter subunit IIB
			AOO72469.1	NEB5A_22155	4471741	4472862	-1	aminopeptidase
			AOO72470.1	NEB5A_22160	4473648	4474394	-1	hypothetical protein
			AOO72471.1	NEB5A_22165	4474450	4474995	-1	GNAT family N-acetyltransferase
			AOO72472.1	NEB5A_22170	4475007	4475264	-1	hypothetical protein
			AOO72473.1	NEB5A_22175	4475755	4475886	-1	hypothetical protein
			AOO72745.1	NEB5A_22180	4476050	4476259	1	DNA helicase
			AOO72474.1	NEB5A_22185	4476226	4477242	1	hypothetical protein
			AOO72746.1	NEB5A_22190	4477825	4478805	-1	9-O-acetyl-N-acetylneuraminic acid deacetylase
			AOO72475.1	NEB5A_22195	4478870	4479976	-1	N-acetylneuraminic acid mutarotase
			AOO72476.1	NEB5A_22200	4479996	4480544	-1	porin
			AOO72477.1	NEB5A_22205	4481084	4481230	1	hypothetical protein
				NEB5A_22210	4481512	4481907	-1	hypothetical protein
			AOO72478.1	NEB5A_22215	4482168	4482770	1	integrase
			AOO72479.1	NEB5A_22220	4483510	4484013	1	transposase
			AOO72480.1	NEB5A_22225	4484066	4484620	1	tyrosine recombinase
			AOO72481.1	NEB5A_22230	4484700	4484888	-1	hypothetical protein
			AOO72482.1	NEB5A_22235	4485102	4485650	1	type-1 fimbrial protein subunit A
			AOO72483.1	NEB5A_22240	4485757	4486254	1	fimbrial protein
			AOO72484.1	NEB5A_22245	4486291	4487016	1	molecular chaperone FimC
			AOO72485.1	NEB5A_22250	4487083	4489719	1	fimbrial protein
			AOO72486.1	NEB5A_22255	4489729	4490259	1	fimbrial protein
			AOO72487.1	NEB5A_22260	4490272	4490775	1	fimbrial protein
			AOO72488.1	NEB5A_22265	4490795	4491697	1	fimbrial protein
			AOO72489.1	NEB5A_22270	4491940	4493283	-1	gluconate permease
			AOO72490.1	NEB5A_22275	4493441	4493671	1	hypothetical protein
			AOO72491.1	NEB5A_22280	4493623	4494807	1	mannonate dehydratase
4445269	4452668	7399	AOO72441.1	NEB5A_22000	4445269	4446486	1	transporter
			AOO72743.1	NEB5A_22005	4446498	4447616	1	oxidoreductase
			AOO72442.1	NEB5A_22010	4447837	4448094	-1	hypothetical protein
			AOO72443.1	NEB5A_22015	4448117	4448320	1	hypothetical protein
			AOO72444.1	NEB5A_22020	4448408	4448674	1	transposase
			AOO72445.1	NEB5A_22025	4448677	4449828	-1	integrase
			AOO72446.1	NEB5A_22030	4449785	4450153	-1	transposase
				NEB5A_22035	4450169	4451004	1	transposase
			AOO72447.1	NEB5A_22040	4451087	4451344	1	hypothetical protein
			AOO72448.1	NEB5A_22045	4451901	4452668	-1	ferric citrate ABC transporter ATP-binding protein FecE
4476050	4487016	10966	AOO72745.1	NEB5A_22180	4476050	4476259	1	DNA helicase
			AOO72474.1	NEB5A_22185	4476226	4477242	1	hypothetical protein
			AOO72746.1	NEB5A_22190	4477825	4478805	-1	9-O-acetyl-N-acetylneuraminic acid deacetylase
			AOO72475.1	NEB5A_22195	4478870	4479976	-1	N-acetylneuraminic acid mutarotase
			AOO72476.1	NEB5A_22200	4479996	4480544	-1	porin
			AOO72477.1	NEB5A_22205	4481084	4481230	1	hypothetical protein
				NEB5A_22210	4481512	4481907	-1	hypothetical protein
			AOO72478.1	NEB5A_22215	4482168	4482770	1	integrase
			AOO72479.1	NEB5A_22220	4483510	4484013	1	transposase
			AOO72480.1	NEB5A_22225	4484066	4484620	1	tyrosine recombinase
			AOO72481.1	NEB5A_22230	4484700	4484888	-1	hypothetical protein
			AOO72482.1	NEB5A_22235	4485102	4485650	1	type-1 fimbrial protein subunit A
			AOO72483.1	NEB5A_22240	4485757	4486254	1	fimbrial protein
			AOO72484.1	NEB5A_22245	4486291	4487016	1	molecular chaperone FimC
4518899	4523449	4550	AOO72514.1	NEB5A_22405	4518899	4519975	-1	5-methylcytosine-specific restriction endonuclease system specificity protein McrC
			AOO72515.1	NEB5A_22410	4519945	4521324	-1	restriction endonuclease
			AOO72516.1	NEB5A_22415	4521486	4521827	-1	hypothetical protein
			AOO72517.1	NEB5A_22420	4522055	4523449	-1	restriction endonuclease subunit S
			AOO72518.1	NEB5A_22425	4523446	4525035	-1	SAM-dependent methyltransferase

## Sheet: IS ED1
Contig	Sequences producing	IS Family	Group	Origin	Score	E. value
	significant alignments				(bits)
Contig 1	ISEc46	IS200/IS605	IS605	Escherichia coli	3408	0.0
	IS200C	IS200/IS605	IS200	Escherichia coli	1152	0.0
	IS200F	IS200/IS605	IS200	Salmonella typhimurium	950	0.0
	ISEc1	ISAs1		Escherichia coli	894	0.0
	IS200	IS200/IS605	IS200	Salmonella typhimurium	884	0.0
	ISEc5	ISAs1		Escherichia coli	878	0.0
	IS200H	IS200/IS605	IS200	Salmonella abortusovis	825	0.0
	IS1541D	IS200/IS605	IS200	Yersinia enterocolitica	729	0.0
	ISEch5	IS200/IS605	IS200	Dickeya dadantii	708	0.0
	IS1541C	IS200/IS605	IS200	Yersinia enterocolitica	696	0.0
	IS200G	IS200/IS605	IS200	Yersinia pestis	636	9e-180
	IS1541A	IS200/IS605	IS200	Yersinia pseudotuberculosis	636	9e-180
	IS1541B	IS200/IS605	IS200	Yersinia pseudotuberculosis	628	2e-177
	ISSen13	ISNCY	IS1202	Salmonella enterica	539	1e-150
	ISEc31	IS3	IS3	Escherichia coli	161	1e-36
	ISCfr6	IS3	IS3	Citrobacter freundii	145	8e-32
	ISAeme8	IS200/IS605	IS605	Aeromonas media	125	8e-26
	MITEEc1	IS630		Escherichia coli	109	5e-21
	ISAeme9	IS200/IS605	IS1341	Aeromonas media	89.7	4e-15
	ISKpn21	ISNCY	IS1202	Klebsiella pneumoniae	63.9	2e-07
	IS621	IS110		Escherichia coli	60.0	4e-06
	ISShfr6	IS3	IS3	Shewanella frigidimarina	58.0	2e-05
	ISPpr10	ISAs1		Photobacterium profundum	56.0	6e-05
	ISKpn9	ISAs1		Klebsiella pneumoniae	52.0	0.001
	ISSba5	IS3	IS3	Shewanella baltica	50.1	0.004
	ISEc26	ISAs1		Escherichia coli	48.1	0.015
	Tn4430	Tn3		Bacillus thuringiensis	44.1	0.23
	ISVsa11	IS3	IS3	Aliivibrio salmonicida	44.1	0.23
	ISCARN10	IS200/IS605	IS200	Metagenomic data	44.1	0.23
	ISPrre1	IS3	IS3	Providencia rettgeri	42.1	0.91
	ISPch1	IS1595	ISPna2	Pontibacillus chungwhensis	42.1	0.91
	ISHwa18	IS200/IS605	IS1341	Haloquadratum walsbyi	42.1	0.91
	ISBrsa1	IS3	IS3	Brenneria salicis	42.1	0.91
	ISOih2	IS200/IS605	IS200	Oceanobacillus iheyensis	42.1	0.91
	ISAlg	IS3	IS3	Vibrio cholerae	42.1	0.91
	ISPre3	IS66		Pseudomonas resinovorans	42.1	0.91
	ISVch4	IS3	IS3	Vibrio cholerae	42.1	0.91
	ISTvo3	IS481		Thermoplasma volcanium	42.1	0.91
	ISXa1	ISAs1		Xanthobacter autotrophicus	42.1	0.91
	IS1469	IS200/IS605	IS200	Clostridium perfringens	42.1	0.91
	ISEch13	IS110		Dickeya dadantii	40.1	3.6
	MITEYpe1	IS630		Yersinia pestis	40.1	3.6
	ISCosp3	IS1595	ISPna2	Colwellia sp.	40.1	3.6
	ISPsy34	IS66		Pseudomonas syringae	40.1	3.6
	TnAs2	Tn3		Aeromonas salmonicida	40.1	3.6
	ISNma6	IS630		Natrialba magadii	40.1	3.6
	ISKol11	ISNCY	ISLbi1	Kosmotoga olearia	40.1	3.6
	ISCARN107	IS5	IS5	Metagenomic data	40.1	3.6
	ISSlo2	IS3	IS3	Shewanella loihica	40.1	3.6
	ISSba3	IS3	IS3	Shewanella baltica	40.1	3.6
	ISVha1	ISAs1		Vibrio harveyi	40.1	3.6
	ISMaq1	IS3	IS407	Marinobacter aquaeolei	40.1	3.6
	ISNmu1	IS3	IS3	Nitrosospira multiformis	40.1	3.6
	ISLxx3	IS21		Leifsonia xyli	40.1	3.6
	IS657	IS200/IS605	IS200	Bacillus halodurans	40.1	3.6
Contig 2	IS200C	IS200/IS605	IS200	Escherichia coli	137	2e-29
	IS200F	IS200/IS605	IS200	Salmonella typhimurium	135	6e-29
	IS200	IS200/IS605	IS200	Salmonella typhimurium	131	1e-27
	IS200H	IS200/IS605	IS200	Salmonella abortusovis	119	4e-24
	IS1541D	IS200/IS605	IS200	Yersinia enterocolitica	111	9e-22
	IS1541C	IS200/IS605	IS200	Yersinia enterocolitica	99.6	3e-18
	IS200G	IS200/IS605	IS200	Yersinia pestis	95.6	5e-17
	IS1541A	IS200/IS605	IS200	Yersinia pseudotuberculosis	95.6	5e-17
	IS1541B	IS200/IS605	IS200	Yersinia pseudotuberculosis	93.7	2e-16
	ISEch5	IS200/IS605	IS200	Dickeya dadantii	75.8	5e-11
	IS621	IS110		Escherichia coli	61.9	7e-07
	MITEEc1	IS630		Escherichia coli	46.1	0.044
	ISPa108	IS21		Pseudomonas aeruginosa	44.1	0.17
	ISHahy15	IS1182		Halanaerobium hydrogeniformans	44.1	0.17
	ISMbu2	ISNCY	ISM1	Methanococcoides burtonii	44.1	0.17
	ISNarch1	IS200/IS605	IS1341	Natrialbaceae archaeon	42.1	0.69
	ISRssp5	IS5	IS903	Roseovarius sp.	42.1	0.69
	ISPlu4	IS1634		Photorhabdus luminescens	42.1	0.69
	IS222	IS3	IS3	Pseudomonas aeruginosa	42.1	0.69
	ISPye20	IS5		Paracoccus yeei	40.1	2.7
	ISPa43	Tn3		Pseudomonas aeruginosa	40.1	2.7
Contig 3	MITEEc1	IS630		Escherichia coli	244	9e-62
	ISKpn42	IS110		Klebsiella pneumoniae	182	3e-43
	IS200C	IS200/IS605	IS200	Escherichia coli	153	3e-34
	IS200F	IS200/IS605	IS200	Salmonella typhimurium	143	3e-31
	ISEch5	IS200/IS605	IS200	Dickeya dadantii	135	6e-29
	IS200G	IS200/IS605	IS200	Yersinia pestis	135	6e-29
	IS1541B	IS200/IS605	IS200	Yersinia pseudotuberculosis	135	6e-29
	IS1541A	IS200/IS605	IS200	Yersinia pseudotuberculosis	135	6e-29
	IS200	IS200/IS605	IS200	Salmonella typhimurium	127	2e-26
	IS1541C	IS200/IS605	IS200	Yersinia enterocolitica	127	2e-26
	IS200H	IS200/IS605	IS200	Salmonella abortusovis	119	4e-24
	IS1541D	IS200/IS605	IS200	Yersinia enterocolitica	119	4e-24
	MITEYpe1	IS630		Yersinia pestis	69.9	3e-09
	ISSm3	IS110		Serratia marcescens	58.0	1e-05
	IS621	IS110		Escherichia coli	58.0	1e-05
	ISCARN10	IS200/IS605	IS200	Metagenomic data	44.1	0.17
	ISHar5	IS30		Herminiimonas arsenicoxydans	44.1	0.17
	ISHar4	IS30		Herminiimonas arsenicoxydans	44.1	0.17
	ISShsp4	IS1595	ISSod11	Sphingomonas sp.	42.1	0.69
	ISCte6	IS5	IS903	Comamonas testosteroni	42.1	0.69
	ISSod9	Tn3		Shewanella oneidensis	42.1	0.69
	ISHvo19	IS200/IS605	IS1341	Haloferax volcanii	40.1	2.7
	ISSpu20	IS5	IS903	Shewanella putrefaciens	40.1	2.7
	ISMhu5	IS1634		Methanospirillum hungatei	40.1	2.7
Contig 4	IS1X2	IS1		Escherichia vulneris	145	5e-32
	IS1X1	IS1		Shigella flexneri	145	5e-32
	MITEEc1	IS630		Escherichia coli	143	2e-31
	IS1X4	IS1		Escherichia hermannii	137	1e-29
	IS1F	IS1		Escherichia coli	137	1e-29
	ISSen9	IS1		Salmonella enterica	129	3e-27
	IS200C	IS200/IS605	IS200	Escherichia coli	129	3e-27
	IS1X3	IS1		Escherichia fergusonii	129	3e-27
	IS1S	IS1		Shigella sonnei	129	3e-27
	IS1R	IS1		Escherichia coli	129	3e-27
	IS1D	IS1		Escherichia coli	129	3e-27
	IS1A	IS1		Escherichia coli	129	3e-27
	ISKpn14	IS1		Klebsiella pneumoniae	121	8e-25
	IS1G	IS1		Escherichia coli	121	8e-25
	IS1B	IS1		Escherichia coli	121	8e-25
	IS1SD	IS1		Shigella dysenteriae	119	3e-24
	IS200F	IS200/IS605	IS200	Salmonella typhimurium	111	8e-22
	IS200	IS200/IS605	IS200	Salmonella typhimurium	107	1e-20
	IS1541D	IS200/IS605	IS200	Yersinia enterocolitica	103	2e-19
	IS200H	IS200/IS605	IS200	Salmonella abortusovis	95.6	5e-17
	IS1541C	IS200/IS605	IS200	Yersinia enterocolitica	91.7	7e-16
	IS200G	IS200/IS605	IS200	Yersinia pestis	87.7	1e-14
	IS1541A	IS200/IS605	IS200	Yersinia pseudotuberculosis	87.7	1e-14
	IS1541B	IS200/IS605	IS200	Yersinia pseudotuberculosis	85.7	4e-14
	MITEYpe1	IS630		Yersinia pestis	79.8	3e-12
	ISEch5	IS200/IS605	IS200	Dickeya dadantii	77.8	1e-11
	ISRor2	ISNCY	ISPlu15	Raoultella ornithinolytica	48.1	0.009
	ISRor3	ISNCY	ISPlu15	Raoultella ornithinolytica	46.1	0.037
	ISAs20	IS3	IS3	Aeromonas salmonicida	44.1	0.15
	ISPa94	IS1182		Pseudomonas aeruginosa	42.1	0.58
	TnShfr1	Tn3		Shewanella frigidimarina	42.1	0.58
	ISOan9	IS256		Octadecabacter antarcticus	42.1	0.58
	ISDeac1	IS1380		Delftia acidovorans	42.1	0.58
	ISSty2	IS3	IS3	Salmonella typhimurium	42.1	0.58
	IS1230B	IS3	IS3	Salmonella enteritidis	42.1	0.58
	ISAlw23	IS3	IS51	Acinetobacter lwoffii	40.1	2.3
	ISAba49	IS66		Acinetobacter baumannii	40.1	2.3
	ISBmu7	IS21		Burkholderia multivorans	40.1	2.3
	ISCldi2	IS1595	ISPna2	Clostridium disporicum	40.1	2.3
	ISAba33	IS4	IS10	Acinetobacter baumannii	40.1	2.3
	ISPa41	IS5	IS5	Pseudomonas aeruginosa	40.1	2.3
	ISLpn12	IS21		Legionella pneumophila	40.1	2.3
	ISButh6	IS5		Burkholderia thailandensis	40.1	2.3
	ISAzo2	IS1182		Azoarcus sp.	40.1	2.3
	ISGob5	ISAs1		Gemmata obscuriglobus	40.1	2.3
	ISYpe1	IS3	IS407	Yersinia pestis	40.1	2.3
	ISYps8	IS3	IS407	Yersinia pseudotuberculosis	40.1	2.3
	ISBian1	IS5	IS5	Bifidobacterium animalis	40.1	2.3
	ISPsp16	IS21		Pseudomonas sp.	38.2	9.1
	ISArsp13	IS3	IS150	Arthrobacter sp.	38.2	9.1
	ISSen7	ISNCY	ISPlu15	Salmonella enterica	38.2	9.1
	ISBmo1	IS1595	ISNha5	Belnapia moabensis	38.2	9.1
	ISPsy42	Tn3		Pseudomonas syringae	38.2	9.1
	ISPvsp1	IS1595		Prevotella sp.	38.2	9.1
	ISVal3	IS1595	ISPna2	Vibrio alginolyticus	38.2	9.1
	ISAisp6	IS21		Acidovorax sp.	38.2	9.1
	ISMav9	ISNCY	ISDol1	Mycobacterium avium	38.2	9.1
	ISHwa24	IS200/IS605	IS1341	Haloquadratum walsbyi	38.2	9.1
	ISNpe6	IS1595	ISH4	Natrinema pellirubrum	38.2	9.1
	ISEc39	IS256		Escherichia coli	38.2	9.1
	ISNpu13	Tn3		Nostoc punctiforme	38.2	9.1
	ISMch7	IS701		Methylobacterium chloromethanicum	38.2	9.1
	ISMex8	IS21		Methylobacterium extorquens	38.2	9.1
	ISShfr9	Tn3		Shewanella frigidimarina	38.2	9.1
	IS621	IS110		Escherichia coli	38.2	9.1
	ISSba4	IS3	IS3	Shewanella baltica	38.2	9.1
	ISChy6	IS481		Carboxydothermus hydrogenoformans	38.2	9.1
	ISHar4	IS30		Herminiimonas arsenicoxydans	38.2	9.1
	ISSfl11	IS3	IS3	Shigella flexneri	38.2	9.1
	ISCps9	IS3	IS3	Colwellia psychrerythraea	38.2	9.1
	ISLre2	ISLre2		Lactobacillus reuteri	38.2	9.1
	IS882	Tn3		Ralstonia eutropha	38.2	9.1
	ISRso14	IS3	IS407	Ralstonia solanacearum	38.2	9.1
	ISMmy1	IS1634		Mycoplasma mycoides	38.2	9.1
	ISH50	IS1595	ISH4	Halobacterium salinarum	38.2	9.1
	ISH4	IS1595	ISH4	Halobacterium sp.	38.2	9.1
	IS987	IS3	IS51	Mycobacterium bovis	38.2	9.1
	IS986	IS3	IS51	Mycobacterium tuberculosis	38.2	9.1
	IS6110	IS3	IS51	Mycobacterium tuberculosis	38.2	9.1
Contig 5	IS609	IS200/IS605	IS605	Escherichia coli	3227	0.0
	ISEc1	ISAs1		Escherichia coli	2200	0.0
	ISEc5	ISAs1		Escherichia coli	2185	0.0
	IS200C	IS200/IS605	IS200	Escherichia coli	1199	0.0
	IS200F	IS200/IS605	IS200	Salmonella typhimurium	965	0.0
	IS200	IS200/IS605	IS200	Salmonella typhimurium	908	0.0
	IS200H	IS200/IS605	IS200	Salmonella abortusovis	841	0.0
	ISEc44	IS200/IS605	IS605	Escherichia coli	763	0.0
	IS1541D	IS200/IS605	IS200	Yersinia enterocolitica	722	0.0
	ISEch5	IS200/IS605	IS200	Dickeya dadantii	716	0.0
	IS1541C	IS200/IS605	IS200	Yersinia enterocolitica	696	0.0
	IS200G	IS200/IS605	IS200	Yersinia pestis	644	0.0
	IS1541A	IS200/IS605	IS200	Yersinia pseudotuberculosis	644	0.0
	IS1541B	IS200/IS605	IS200	Yersinia pseudotuberculosis	636	5e-180
	ISSen6	IS200/IS605	IS605	Salmonella enterica	472	2e-130
	ISAs26	IS200/IS605	IS605	Aeromonas salmonicida	258	5e-66
	IS1414	IS256		Escherichia coli	218	4e-54
	ISEc41	IS200/IS605	IS605	Escherichia coli	180	8e-43
	ISKpn47	IS256		Klebsiella pneumoniae	172	2e-40
	ISKpn41	IS200/IS605	IS1341	Klebsiella pneumoniae	170	8e-40
	ISSoEn2	IS256		Primary endosymbiont	129	3e-27
	ISEic2	IS256		Edwardsiella ictaluri	121	7e-25
	IS621	IS110		Escherichia coli	67.9	9e-09
	IS285	IS256		Yersinia pestis	65.9	3e-08
	MITEEc1	IS630		Escherichia coli	61.9	5e-07
	ISErsp1	IS481		Erwinia sp.	61.9	5e-07
	ISAba30	IS200/IS605	IS605	Acinetobacter baumannii	60.0	2e-06
	ISMysp7	IS256		Mycobacterium sp.	58.0	8e-06
	ISPa46	IS256		Pseudomonas aeruginosa	58.0	8e-06
	ISPa73	IS256		Pseudomonas aeruginosa	56.0	3e-05
	ISAs3	IS256		Aeromonas salmonicida	56.0	3e-05
	ISSe1	ISAs1		Salmonella enterica	56.0	3e-05
	ISPa1328	IS256		Pseudomonas aeruginosa	50.1	0.002
	IS1113	IS256		Xanthomonas oryzae	50.1	0.002
	ISPa125	IS256		Pseudomonas aeruginosa	48.1	0.008
	ISHamu1	IS200/IS605	IS1341	Haloferax mucosum	48.1	0.008
	ISGte1	IS256		Gordonia terrae	46.1	0.032
	MITEPlu5	IS630		Photorhabdus luminescens	44.1	0.13
	ISSoc9	IS200/IS605	IS1341	Synechococcus sp.	44.1	0.13
	ISKpn31	ISAs1		Klebsiella pneumoniae	44.1	0.13
	ISOpb2	IS5	IS5	Opitutaceae bacterium	44.1	0.13
	ISCARN10	IS200/IS605	IS200	Metagenomic data	44.1	0.13
	ISSod18	IS256		Shewanella oneidensis	44.1	0.13
	ISVvu4	IS481		Vibrio vulnificus	44.1	0.13
	ISAba42	IS256		Acinetobacter baumannii	42.1	0.50
	ISHaru2	IS200/IS605	IS1341	Halobellus rufus	42.1	0.50
	ISKpn19	ISKra4	ISAzba1	Klebsiella pneumoniae	42.1	0.50
	ISUnCu14	IS66		uncultured bacterium	42.1	0.50
	ISCysp7	ISAs1		Cyanothece sp.	42.1	0.50
	ISOih2	IS200/IS605	IS200	Oceanobacillus iheyensis	42.1	0.50
	ISShes15	IS481		Shewanella sp.	42.1	0.50
	IS1469	IS200/IS605	IS200	Clostridium perfringens	42.1	0.50
	ISAba50	IS256		Acinetobacter baumannii	40.1	2.0
	ISAcp5	IS110	IS1111	Acidobacterium capsulatum	40.1	2.0
	ISPa80	IS200/IS605	IS1341	Pseudomonas aeruginosa	40.1	2.0
	MITEYpe1	IS630		Yersinia pestis	40.1	2.0
	ISPlu20	IS66		Photorhabdus luminescens	40.1	2.0
	ISThph1	IS1182		Thauera phenylacetica	40.1	2.0
	ISCaje3	IS607		Campylobacter sp.	40.1	2.0
	ISHwa34	IS200/IS605	IS1341	Haloquadratum walsbyi	40.1	2.0
	ISH39	IS200/IS605	IS1341	Halobacterium salinarum	40.1	2.0
	ISNamo21	IS200/IS605	IS1341	Natronomonas moolapensis	40.1	2.0
	ISHhu7	IS200/IS605	IS1341	Halobacterium hubeiense	40.1	2.0
	ISHmu7	IS200/IS605	IS1341	Halomicrobium mukohataei	40.1	2.0
	ISNagr2	IS630		Natronobacterium gregoryi	40.1	2.0
	ISMva4	IS256		Mycobacterium vanbaalenii	40.1	2.0
	ISNml4	IS256		Nakamurella multipartita	40.1	2.0
	ISAzs27	IS30		Azospirillum sp.	40.1	2.0
	ISAzs2	IS21		Azospirillum sp.	40.1	2.0
	ISRm20	IS481		Sinorhizobium meliloti	40.1	2.0
	ISSysp5	IS5		Synechococcus sp.RS9917	40.1	2.0
	ISAde4	IS3	IS407	Anaeromyxobacter dehalogenans	40.1	2.0
	ISPmi1	IS3	IS51	Proteus mirabilis	40.1	2.0
	ISAzo17	IS21		Azoarcus sp.	40.1	2.0
	ISEc26	ISAs1		Escherichia coli	40.1	2.0
	ISBxe3	IS481		Burkholderia xenovorans	40.1	2.0
	ISPa20	IS3	IS3	Pseudomonas aeruginosa	40.1	2.0
	ISMba10	IS630		Methanosarcina barkeri	40.1	2.0
	IS657	IS200/IS605	IS200	Bacillus halodurans	40.1	2.0
	ISArsp16	ISNCY		Arthrobacter sp.	38.2	7.8
	ISArsp9	ISNCY		Arthrobacter sp.	38.2	7.8
	ISLbp5	IS5	IS427	Leptospira borgpetersenii	38.2	7.8
	ISPye43	IS256		Paracoccus yeei	38.2	7.8
	ISDev1	IS21		Devosia sp.	38.2	7.8
	ISPa87	IS21		Pseudomonas aeruginosa	38.2	7.8
	ISPa77	IS21		Pseudomonas aeruginosa	38.2	7.8
	ISPsy41	IS21		Pseudomonas syringae	38.2	7.8
	ISPsy40	IS21		Pseudomonas syringae	38.2	7.8
	ISMaq7	IS256		Marinobacter aquaeolei	38.2	7.8
	ISPko7	IS110	IS1111	Paracoccus kondratievae	38.2	7.8
	ISMyma10	IS3	IS51	Mycobacterium marinum	38.2	7.8
	ISAs7	IS3	IS51	Aeromonas salmonicida	38.2	7.8
	ISSlgl1	IS256	IS1249	Slackia heliotrinireducens	38.2	7.8
	ISPa38	Tn3		Pseudomonas aeruginosa	38.2	7.8
	ISAzs30	IS21		Azospirillum sp.	38.2	7.8
	ISAzs21	IS66		Azospirillum sp.	38.2	7.8
	ISAzs17	Tn3		Azospirillum sp.	38.2	7.8
	ISRel19	IS66		Rhizobium etli	38.2	7.8
	ISMgi3	IS1182		Mycobacterium gilvum	38.2	7.8
	ISVsp6	ISAs1		Verrucomicrobium spinosum	38.2	7.8
	ISButh4	IS5	IS5	Burkholderia thailandensis	38.2	7.8
	ISMtsp17	IS110	IS1111	Methylobacterium sp.	38.2	7.8
	ISMtsp15	IS481		Methylobacterium sp.	38.2	7.8
	ISAau5	ISNCY		Arthrobacter aurescens	38.2	7.8
	ISAzba8	IS256		Azospirillum brasilense	38.2	7.8
	ISAar18	IS110		Arthrobacter arilaitensis	38.2	7.8
	ISCth10	IS200/IS605	IS200	Clostridium thermocellum	38.2	7.8
	ISVsa13	ISAs1		Aliivibrio salmonicida	38.2	7.8
	ISVsp18	ISAs1		Verrucomicrobium spinosum	38.2	7.8
	ISMae8	ISAs1		Microcystis aeruginosa	38.2	7.8
	ISCARN113	ISL3		Metagenomic data	38.2	7.8
	ISAcma7	IS256		Acaryochloris marina	38.2	7.8
	ISCARN88	IS1182		Metagenomic data	38.2	7.8
	ISRme10	IS30		Ralstonia metallidurans	38.2	7.8
	ISAzo9	IS630		Azoarcus sp.	38.2	7.8
	ISPre4	IS21		Pseudomonas resinovorans	38.2	7.8
	ISPpr12	ISAs1		Photobacterium profundum	38.2	7.8
	ISMrsp3	IS1595	ISSod11	Marinobacter sp.	38.2	7.8
	ISNwi2	IS1595	ISNwi1	Nitrobacter winogradskyi	38.2	7.8
	ISAs5	IS3	IS51	Aeromonas salmonicida	38.2	7.8
	ISFsp4	IS200/IS605	IS605	Frankia sp.	38.2	7.8
	ISPlu5	IS200/IS605	IS200	Photorhabdus luminescens	38.2	7.8
	ISPa12	IS4	ISH8	Pseudomonas aeruginosa	38.2	7.8
	ISRso19	IS21		Ralstonia solanacearum	38.2	7.8
	ISRru1	IS3	IS51	Rhodococcus ruber	38.2	7.8
	ISPs1	IS5	IS427	Pseudomonas syringae	38.2	7.8
	ISPpu7	IS21		Pseudomonas putida	38.2	7.8
	ISPfl2	IS30		Pseudomonas fluorescens	38.2	7.8
	ISMt3	IS21		Mycobacterium tuberculosis	38.2	7.8
	ISMbo1	IS21		Mycobacterium bovis	38.2	7.8
	ISEnfa200	IS200/IS605	IS200	Enterococcus faecium	38.2	7.8
	ISEhe4	IS3	IS407	Erwinia herbicola	38.2	7.8
	ISC1041	IS30		Sulfolobus solfataricus	38.2	7.8
	IS1491	IS21		Pseudomonas alcaligenes	38.2	7.8
	IS1162	IS21		Pseudomonas fluorescens	38.2	7.8
Contig 6	ISSba14	Tn3		Shewanella baltica	222	2e-55
	ISEc13	IS4	IS50	Escherichia coli	222	2e-55
	MITEEc1	IS630		Escherichia coli	79.8	2e-12
	ISYps3	Tn3		Yersinia pseudotuberculosis	63.9	1e-07
	MITEYpe1	IS630		Yersinia pestis	46.1	0.029
	ISKpn47	IS256		Klebsiella pneumoniae	44.1	0.11
	ISMph1	IS1595	ISNha5	Methylobacterium phyllosphaerae	42.1	0.45
	ISPlu10	IS630		Photorhabdus luminescens	42.1	0.45
	ISPa43	Tn3		Pseudomonas aeruginosa	40.1	1.8
	ISPso3	IS5	IS5	Paracoccus solventivorans	40.1	1.8
	ISAau5	ISNCY		Arthrobacter aurescens	40.1	1.8
	ISMav6	IS110		Mycobacterium avium	40.1	1.8
	ISDde1	IS5	IS5	Desulfovibrio desulfuricans	40.1	1.8
	IS621	IS110		Escherichia coli	40.1	1.8
	ISC1217	ISNCY		Sulfolobus solfataricus	40.1	1.8
	ISEch14	IS3	IS150	Dickeya dadantii	38.2	7.0
	ISVfl1	IS1595	IS1595	Vibrio fluvialis	38.2	7.0
	ISThde1	IS1595		Thiobacillus denitrificans	38.2	7.0
	ISPgo1	IS1595	ISSod11	Psychroflexus gondwanensis	38.2	7.0
	ISJsp3	IS21		Janthinobacterium sp	38.2	7.0
	ISTsu3	IS1182		Thermaerobacter subterraneus	38.2	7.0
	ISEc60	IS4	IS10	Escherichia coli	38.2	7.0
	TnAs2	Tn3		Aeromonas salmonicida	38.2	7.0
	ISPko3	IS5	IS903	Paracoccus kondratievae	38.2	7.0
	ISGva1	IS256	IS1249	Gardnerella vaginalis	38.2	7.0
	ISCob1	IS256		Caldicellulosiruptor obsidiansis	38.2	7.0
	ISVba2	IS5	IS903	Vibrionales bacterium	38.2	7.0
	ISPlc1	IS5	IS903	Paracoccus alcaliphilus	38.2	7.0
	ISBuce2	IS5		Burkholderia cepacia	38.2	7.0
	ISGpr5	IS5	IS5	Gamma proteobacterium	38.2	7.0
	ISPfr13	IS3	IS51	Propionibacterium freudenreichii	38.2	7.0
	ISDre4	IS1380		Desulfotomaculum reducens	38.2	7.0
	ISBce1	IS1182		Bacillus cereus	38.2	7.0
	ISStma11	ISL3		Stenotrophomonas maltophilia	38.2	7.0
	ISCARN82	IS5	IS1031	Metagenomic data	38.2	7.0
	ISCARN8	IS5	IS5	Metagenomic data	38.2	7.0
	ISSag8	IS1182		Streptococcus agalactiae	38.2	7.0
	IS1563	IS1182		Streptococcus agalactiae	38.2	7.0
	ISRme9	IS21		Ralstonia metallidurans	38.2	7.0
	ISMsm5	IS630		Mycobacterium smegmatis	38.2	7.0
	ISHne5	IS110		Hyphomonas neptunium	38.2	7.0
	ISRme4	IS21		Cupriavidus metallidurans	38.2	7.0
	ISAba5	IS5	IS903	Acinetobacter baumannii	38.2	7.0
	ISPsy3	IS91		Pseudomonas syringae	38.2	7.0
	ISBf2	IS21		Bacteroides fragilis	38.2	7.0
	ISAca1	IS3	IS407	Acinetobacter calcoaceticus	38.2	7.0
Contig 7	IS609	IS200/IS605	IS605	Escherichia coli	3188	0.0
	ISEc44	IS200/IS605	IS605	Escherichia coli	724	0.0
	ISSen6	IS200/IS605	IS605	Salmonella enterica	456	8e-126
	ISAs26	IS200/IS605	IS605	Aeromonas salmonicida	250	9e-64
	MITEEc1	IS630		Escherichia coli	188	3e-45
	ISEc41	IS200/IS605	IS605	Escherichia coli	180	7e-43
	ISKpn41	IS200/IS605	IS1341	Klebsiella pneumoniae	163	2e-37
	MITEYpe1	IS630		Yersinia pestis	69.9	2e-09
	IS621	IS110		Escherichia coli	69.9	2e-09
	ISAba30	IS200/IS605	IS605	Acinetobacter baumannii	60.0	2e-06
	ISCfr3	ISNCY	ISPlu15	Citrobacter freundii	48.1	0.007
	ISHamu1	IS200/IS605	IS1341	Haloferax mucosum	48.1	0.007
	ISKpn7	IS21		Klebsiella pneumoniae	48.1	0.007
	ISSoc9	IS200/IS605	IS1341	Synechococcus sp.	44.1	0.11
	ISPa60	ISAs1		Pseudomonas aeruginosa	42.1	0.42
	ISSpu14	IS5	IS903	Shewanella putrefaciens	42.1	0.42
	ISGob3	IS66	ISBst12	Gemmata obscuriglobus	42.1	0.42
	ISHne2	IS481		Hyphomonas neptunium	42.1	0.42
	ISPa80	IS200/IS605	IS1341	Pseudomonas aeruginosa	40.1	1.7
	ISUnCu23	IS1595	ISPna2	Uncultured bacterium	40.1	1.7
	ISXci1	IS21		Xanthomonas citri	40.1	1.7
	ISHwa34	IS200/IS605	IS1341	Haloquadratum walsbyi	40.1	1.7
	ISHarch12	IS6		Halophilic archaeon	40.1	1.7
	ISH39	IS200/IS605	IS1341	Halobacterium salinarum	40.1	1.7
	ISHhu7	IS200/IS605	IS1341	Halobacterium hubeiense	40.1	1.7
	ISHmu7	IS200/IS605	IS1341	Halomicrobium mukohataei	40.1	1.7
	ISErsp1	IS481		Erwinia sp.	40.1	1.7
	ISPph5	ISNCY	ISDol1	Pelodictyon phaeoclathratiforme	40.1	1.7
	ISNisp6	IS66		Nitrobacter sp.	40.1	1.7
	ISGbe2	IS3	IS2	Granulibacter bethesdensis	40.1	1.7
	ISHma9	IS5	ISH1	Haloarcula marismortui	40.1	1.7
	IS5376	IS21		Bacillus stearothermophilus	40.1	1.7
	ISArsp9	ISNCY		Arthrobacter sp.	38.2	6.6
	ISVei4	IS630		Verminephrobacter eiseniae	38.2	6.6
	ISSen7	ISNCY	ISPlu15	Salmonella enterica	38.2	6.6
	ISEc81	IS110	IS1111	Escherichia coli	38.2	6.6
	ISTisp1	IS1595	IS1595	Thiocapsa sp.	38.2	6.6
	ISBrsp10	IS1182		Bradyrhizobium sp.	38.2	6.6
	ISAs33	IS3	IS3	Aeromonas salmonicida	38.2	6.6
	ISCbo5	IS1182		Clostridium botulinum	38.2	6.6
	ISAzs21	IS66		Azospirillum sp.	38.2	6.6
	ISNph15	IS200/IS605	IS1341	Natronomonas pharaonis	38.2	6.6
	ISOan4	IS5	IS903	Octadecabacter antarcticus	38.2	6.6
	ISMgi3	IS1182		Mycobacterium gilvum	38.2	6.6
	ISRsp18	IS5	IS5	Rhizobium sp.	38.2	6.6
	ISCce5	IS66		Clostridium cellulolyticum	38.2	6.6
	ISRsp7	IS1380		Rhizobium sp.	38.2	6.6
	ISFnu2	IS1182		Fusobacterium nucleatum	38.2	6.6
	ISBusp4	IS1182		Burkholderia sp.	38.2	6.6
	ISMex14	IS256		Methylobacterium extorquens	38.2	6.6
	ISDds9	IS5	IS427	Deinococcus deserti	38.2	6.6
	ISOba3	IS1	ISMhu11	Oceanicola batsensis	38.2	6.6
	ISCausp2	IS1595	ISNha5	Caulobacter sp.	38.2	6.6
	ISRsp3	IS21		Rhizobium sp.	38.2	6.6
	ISXo15	IS701		Xanthomonas oryzae	38.2	6.6
	ISFsp4	IS200/IS605	IS605	Frankia sp.	38.2	6.6
	ISFac1	ISH3		Ferroplasma acidarmanus	38.2	6.6
	ISSc1	IS30		Spiroplasma citri	38.2	6.6
	ISRso9	IS5	IS5	Ralstonia solanacearum	38.2	6.6
	ISWosp9	IS4	IS231	Wolbachia sp.	38.2	6.6
	IS469	ISL3		Streptomyces coelicolor	38.2	6.6
	IS1122	IS481		Clavibacter michiganensis	38.2	6.6
Contig 8	IS200C	IS200/IS605	IS200	Escherichia coli	153	2e-34
	IS150	IS3	IS150	Escherichia coli	153	2e-34
	IS103	IS3	IS150	Escherichia coli	153	2e-34
	IS200F	IS200/IS605	IS200	Salmonella typhimurium	145	4e-32
	ISEch5	IS200/IS605	IS200	Dickeya dadantii	137	9e-30
	IS200G	IS200/IS605	IS200	Yersinia pestis	137	9e-30
	IS1541B	IS200/IS605	IS200	Yersinia pseudotuberculosis	137	9e-30
	IS1541A	IS200/IS605	IS200	Yersinia pseudotuberculosis	137	9e-30
	IS200	IS200/IS605	IS200	Salmonella typhimurium	129	2e-27
	IS1541C	IS200/IS605	IS200	Yersinia enterocolitica	129	2e-27
	IS200H	IS200/IS605	IS200	Salmonella abortusovis	121	6e-25
	IS1541D	IS200/IS605	IS200	Yersinia enterocolitica	121	6e-25
	ISKpn8	IS3	IS150	Klebsiella pneumoniae	113	1e-22
	ISSpl1	IS3	IS150	Streptococcus pluranimilium	50.1	0.002
	ISFnu8	IS3	IS150	Fusobacterium nucleatum	50.1	0.002
	ISFnu6	IS3	IS150	Fusobacterium nucleatum	50.1	0.002
	ISAusp1	IS1595	ISNha5	Aurantimonas sp.	46.1	0.026
	ISRme12	IS3	IS150	Ralstonia metallidurans	46.1	0.026
	IS621	IS110		Escherichia coli	44.1	0.10
	IS801	IS91		Pseudomonas syringae	44.1	0.10
	ISEch2	IS3	IS150	Dickeya dadantii	42.1	0.41
	ISHaha5	IS110		Halobacillus halophilus	42.1	0.41
	ISRme16	IS5		Ralstonia eutropha	42.1	0.41
	ISCARN82	IS5	IS1031	Metagenomic data	42.1	0.41
	ISCARN10	IS200/IS605	IS200	Metagenomic data	42.1	0.41
	ISSth6	IS3	IS150	Streptococcus thermophilus	42.1	0.41
	ISSmu1	IS3	IS150	Streptococcus mutans	42.1	0.41
	IS861	IS3	IS150	Streptococcus agalactiae	42.1	0.41
	ISAeca6	IS3	IS407	Aeromonas caviae	40.1	1.6
	ISAcmu1	IS1595	IS1595	Acidiphilium multivorum	40.1	1.6
	ISHti15	IS1595	ISH4	Halorhabdus tiamatea	40.1	1.6
	ISHahy2	IS3	IS150	Halanaerobium hydrogeniformans	40.1	1.6
	ISSymo1	ISNCY	ISDol1	Candidatus Symbiobacter	40.1	1.6
	ISAba33	IS4	IS10	Acinetobacter baumannii	40.1	1.6
	ISAeme6	IS3	IS407	Aeromonas media	40.1	1.6
	ISPfr18	ISL3		Propionibacterium freudenreichii	40.1	1.6
	ISMhu2	IS1182		Methanospirillum hungatei	40.1	1.6
	ISAZo16	IS21		Azoarcus sp.	40.1	1.6
	ISSde12	IS91		Shewanella denitrificans	40.1	1.6
	ISKpn10	IS3	IS407	Klebsiella pneumoniae	40.1	1.6
	ISOba3	IS1	ISMhu11	Oceanicola batsensis	40.1	1.6
	ISPa4	ISNCY		Pseudomonas aeruginosa	40.1	1.6
	ISMt3	IS21		Mycobacterium tuberculosis	40.1	1.6
	ISMbo1	IS21		Mycobacterium bovis	40.1	1.6
	ISBcen27	ISNCY	IS1202	Burkholderia cenocepacia	38.2	6.4
	ISBt3	IS3	IS51	Burkholderia thailandensis	38.2	6.4
	ISCap3	IS1595	IS1595	Candidatus Accumulibacter	38.2	6.4
	ISPpu24	IS110	IS1111		38.2	6.4
	ISPsy36	IS1182		Pseudomonas syringae	38.2	6.4
	ISAs21	IS66	ISBst12	Aeromonas salmonicida	38.2	6.4
	ISEc57	IS21		Escherichia coli	38.2	6.4
	ISUnCu7	ISKra4	ISAzba1	uncultured bacterium	38.2	6.4
	ISPa43	Tn3		Pseudomonas aeruginosa	38.2	6.4
	ISAzs13	ISL3		Azospirillum sp.	38.2	6.4
	ISAco1	IS1182		Anaerostipes coli	38.2	6.4
	ISMno28	IS6		Methylobacterium nodulans	38.2	6.4
	ISDre3	IS1380		Desulfotomaculum reducens	38.2	6.4
	ISAar12	IS1380		Arthrobacter arilaitensis	38.2	6.4
	ISMex14	IS256		Methylobacterium extorquens	38.2	6.4
	ISStma4	IS110		Stenotrophomonas maltophilia	38.2	6.4
	ISAcma13	IS3	IS150	Acaryochloris marina	38.2	6.4
	ISCARN66	IS5	IS5	Metagenomic data	38.2	6.4
	ISKrh2	IS481		Kocuria rhizophila	38.2	6.4
	ISTth8	IS701		Thermus thermophilus	38.2	6.4
	ISBope1	IS3	IS150	Bordetella petrii	38.2	6.4
	ISVch4	IS3	IS3	Vibrio cholerae	38.2	6.4
	ISBf8	IS4	ISPepr1	Bacteroides fragilis	38.2	6.4
	ISMba6	IS4	ISH8	Methanosarcina barkeri	38.2	6.4
	ISPlu7	IS5	IS427	Photorhabdus luminescens	38.2	6.4
	ISLxx3	IS21		Leifsonia xyli	38.2	6.4
	ISAac2	IS5	IS427	Actinobacillus actinomycetemcomitans	38.2	6.4
Contig 9	IS1397	IS3	IS150	Escherichia coli	456	8e-126
	MITEPlu5	IS630		Photorhabdus luminescens	60.0	2e-06
	IS621	IS110		Escherichia coli	56.0	3e-05
	MITEEc1	IS630		Escherichia coli	52.0	0.0004
	ISLla3	IS3	IS150	Lactococcus lactis	48.1	0.007
	MITEYpe1	IS630		Yersinia pestis	42.1	0.41
	ISSen3	IS21		Salmonella enterica	42.1	0.41
	TnDra1	Tn3		Deinococcus radiodurans	40.1	1.6
	ISHoc2	ISKra4	ISKra4	Haliangium ochraceum	40.1	1.6
	ISMae6	IS5	IS5	Microcystis aeruginosa	40.1	1.6
	ISBce18	IS3	IS150	Bacillus cereus	40.1	1.6
	ISPna2	IS1595	ISPna2	Polaromonas naphthalenivorans	40.1	1.6
	IS1661	IS3	IS150	Yersinia pestis	40.1	1.6
	IS866	IS66		Agrobacterium tumefaciens	40.1	1.6
	IS651	ISL3		Bacillus halodurans	40.1	1.6
	ISKqu3	IS110		Klebsiella quasipneumoniae	38.2	6.4
	ISBmu7	IS21		Burkholderia multivorans	38.2	6.4
	ISPsy45	IS5	IS5	Pseudomonas syringae	38.2	6.4
	ISJsp4	IS1595	ISPna2	Janthinobacterium sp.	38.2	6.4
	ISSen8	IS21		Salmonella enterica	38.2	6.4
	ISCfr6	IS3	IS3	Citrobacter freundii	38.2	6.4
	ISMpo4	IS110	IS1111	Methylobacterium populi	38.2	6.4
	ISPa43	Tn3		Pseudomonas aeruginosa	38.2	6.4
	ISRel8	IS66		Rhizobium etli	38.2	6.4
	ISHwa4	IS701		Haloquadratum walsbyi	38.2	6.4
	ISDal2	IS5	IS5	Desulfatibacillum alkenivorans	38.2	6.4
	ISBth14	IS200/IS605	IS1341	Bacillus thuringiensis	38.2	6.4
	ISPfr10	IS3	IS407	Propionibacterium freudenreichii	38.2	6.4
	ISClbu1	IS1182		Clostridium butyricum	38.2	6.4
	ISAzba6	IS630		Azospirillum brasilense	38.2	6.4
	ISAar3	IS3	IS407	Arthrobacter arilaitensis	38.2	6.4
	ISCARN105	IS3	IS3	Metagenomic data	38.2	6.4
	ISCARN96	IS1182		Metagenomic data	38.2	6.4
	ISNwi4	IS1595	ISNha5	Nitrobacter winogradskyi	38.2	6.4
	ISTvo4	IS1634		Thermoplasma volcanium	38.2	6.4
	ISPlu14	IS5		Photorhabdus luminescens	38.2	6.4
	ISEhe2	IS5	IS427	Pantoea agglomerans	38.2	6.4
	IS5377	IS4	IS4Sa	Bacillus stearothermophilus	38.2	6.4
Contig 10	ISEc1	ISAs1		Escherichia coli	2361	0.0
	ISEc5	ISAs1		Escherichia coli	2305	0.0
	IS200C	IS200/IS605	IS200	Escherichia coli	137	9e-30
	ISEch5	IS200/IS605	IS200	Dickeya dadantii	135	4e-29
	IS200G	IS200/IS605	IS200	Yersinia pestis	135	4e-29
	IS1541D	IS200/IS605	IS200	Yersinia enterocolitica	135	4e-29
	IS1541B	IS200/IS605	IS200	Yersinia pseudotuberculosis	135	4e-29
	IS1541A	IS200/IS605	IS200	Yersinia pseudotuberculosis	135	4e-29
	IS200F	IS200/IS605	IS200	Salmonella typhimurium	127	9e-27
	IS1541C	IS200/IS605	IS200	Yersinia enterocolitica	127	9e-27
	IS200	IS200/IS605	IS200	Salmonella typhimurium	111	5e-22
	IS200H	IS200/IS605	IS200	Salmonella abortusovis	103	1e-19
	ISPa42	Tn3		Pseudomonas aeruginosa	87.7	7e-15
	IS621	IS110		Escherichia coli	77.8	7e-12
	ISSe1	ISAs1		Salmonella enterica	56.0	3e-05
	ISCARN10	IS200/IS605	IS200	Metagenomic data	44.1	0.099
	ISMgr1	IS1595	ISSod11	Magnetospirillum gryphiswaldense	42.1	0.39
	ISAlba1	IS1595	IS1595	Alphaproteobacteria bacterium	42.1	0.39
	ISGsi1	IS256	IS1249	Gordonia sihwensis	42.1	0.39
	ISDba1	IS3	IS407	Desulfomicrobium baculatum	42.1	0.39
	ISAzca1	IS1595	ISNha5	Azorhizobium caulinodans	42.1	0.39
	ISEc26	ISAs1		Escherichia coli	42.1	0.39
	ISAcma2	ISAs1		Acaryochloris marina	42.1	0.39
	ISBli7	IS21		Brevibacterium linens	40.1	1.5
	ISAba42	IS256		Acinetobacter baumannii	40.1	1.5
	TnXo19	Tn3		Xanthomonas oryzae	40.1	1.5
	ISPa49	IS110	IS1111	Pseudomonas aeruginosa	40.1	1.5
	ISMtsp17	IS110	IS1111	Methylobacterium sp.	40.1	1.5
	ISMno32	IS1182		Methylobacterium nodulans	40.1	1.5
	ISCARN15	IS66		Metagenomic data	40.1	1.5
	ISCARN13	ISL3		Metagenomic data	40.1	1.5
	ISPpr10	ISAs1		Photobacterium profundum	40.1	1.5
	ISPpr6	IS1595	ISPna2	Photobacterium profundum	40.1	1.5
	IS987	IS3	IS51	Mycobacterium bovis	40.1	1.5
	IS986	IS3	IS51	Mycobacterium tuberculosis	40.1	1.5
	IS6110	IS3	IS51	Mycobacterium tuberculosis	40.1	1.5
	IS10A	IS4	IS10	Pseudomonas aeruginosa	40.1	1.5
	TnEc3	Tn3		Escherichia coli	38.2	6.1
	ISArsp14	ISNCY		Arthrobacter sp.	38.2	6.1
	ISPye10	IS5	IS1031	Paracoccus yeei	38.2	6.1
	ISPba3	IS66		Porphyromonadaceae bacterium	38.2	6.1
	ISCosp1	IS1595	IS1595	Colwellia sp.	38.2	6.1
	ISAisp5	IS1595	ISSod11	Acidovorax sp.	38.2	6.1
	ISNaoc2	IS200/IS605	IS1341	Natronococcus occultus	38.2	6.1
	ISAzs28	IS5	IS1031	Azospirillum sp.	38.2	6.1
	ISSoc2	IS607		Synechococcus sp.	38.2	6.1
	ISStr1	IS1380		Salinispora tropica	38.2	6.1
	ISUnCu12	IS1380		Uncultured marine	38.2	6.1
	ISOih1	IS1182		Oceanobacillus iheyensis	38.2	6.1
	ISAzo2	IS1182		Azoarcus sp.	38.2	6.1
	ISCARN111	IS110	IS1111	Metagenomic data	38.2	6.1
	ISCARN90	IS1595	ISSod11	Metagenomic data	38.2	6.1
	ISAzo15	IS66		Azoarcus sp.	38.2	6.1
	ISAli11	ISL3		Azospirillum lipoferum	38.2	6.1
	ISRosp3	IS1595	ISNha5	Roseobacter sp.	38.2	6.1
	ISSba4	IS3	IS3	Shewanella baltica	38.2	6.1
	ISPpr12	ISAs1		Photobacterium profundum	38.2	6.1
	ISPin4	ISAs1		Psychromonas ingrahamii	38.2	6.1
	ISNpu7	IS701		Nostoc punctiforme	38.2	6.1
	ISMyma5	IS481		Mycobacterium marinum	38.2	6.1
	ISFlsp1	IS21		Flavobacterium sp	38.2	6.1
	ISSiac1	IS701		Singulisphaera acidiphila	38.2	6.1
	ISDeal1	IS66		Dethiobacter alkaliphilus	38.2	6.1
	ISPpu5	IS110	IS1111	Pseudomonas putida	38.2	6.1
	IS643	IS21		Bacillus halodurans	38.2	6.1
	IS1239	IS30		Streptococcus pyogenes	38.2	6.1
Contig 11	IS621	IS110		Escherichia coli	75.8	2e-11
	ISCth10	IS200/IS605	IS200	Clostridium thermocellum	44.1	0.077
	ISRso7	IS256		Ralstonia solanacearum	42.1	0.30
	ISPa96	IS5	IS5	Pseudomonas aeruginosa	40.1	1.2
	ISMko2	IS1595	IS1595	Methylomonas koyamae	40.1	1.2
	ISHli1	IS5	ISH1	Halohasta litchfieldiae	40.1	1.2
	ISCfu1	ISAzo13		Cystobacter fuscus	40.1	1.2
	ISNma5	IS630		Natrialba magadii	40.1	1.2
	ISMex22	Tn3		Methylobacterium extorquens	40.1	1.2
	ISSpe2	IS110	IS1111	Shewanella pealeana	40.1	1.2
	ISKpn50	IS66		Klebsiella pneumoniae	38.2	4.8
	ISArsp14	ISNCY		Arthrobacter sp.	38.2	4.8
	ISCfr3	ISNCY	ISPlu15	Citrobacter freundii	38.2	4.8
	ISPye57	IS3	IS407	Paracoccus yeei	38.2	4.8
	ISPye50	IS5	IS427	Paracoccus yeei	38.2	4.8
	ISPcc6	IS4	IS4	Pectobacterium carotovorum	38.2	4.8
	ISPa85	IS21		Pseudomonas aeruginosa	38.2	4.8
	ISPlu22	ISNCY	ISPlu15	Photorhabdus luminescens	38.2	4.8
	ISMipa1	ISNCY	ISDol1	Microthrix parvicella	38.2	4.8
	ISKpn24	IS66		Klebsiella pneumoniae	38.2	4.8
	ISEc41	IS200/IS605	IS605	Escherichia coli	38.2	4.8
	ISMsm12	IS1380		Mycobacterium smegmatis	38.2	4.8
	ISAzo17	IS21		Azoarcus sp.	38.2	4.8
	ISEc22	IS66		Escherichia coli	38.2	4.8
	ISMva2	IS481		Mycobacterium vanbaalenii	38.2	4.8
	ISEli1	IS3	IS407	Erythrobacter litoralis	38.2	4.8
	ISBad2	IS3	IS150	Bifidobacterium adolescentis	38.2	4.8
	ISLin2	IS3	IS3	Leptospira interrogans	38.2	4.8
	IS220	IS1380		Mycobacterium fortuitum	38.2	4.8
	IS1500B	IS3	IS3	Leptospira interrogans	38.2	4.8
	IS1500A	IS3	IS3	Leptospira interrogans	38.2	4.8
Contig 12	IS200C	IS200/IS605	IS200	Escherichia coli	137	7e-30
	ISEch5	IS200/IS605	IS200	Dickeya dadantii	135	3e-29
	IS200G	IS200/IS605	IS200	Yersinia pestis	135	3e-29
	IS1541D	IS200/IS605	IS200	Yersinia enterocolitica	135	3e-29
	IS1541B	IS200/IS605	IS200	Yersinia pseudotuberculosis	135	3e-29
	IS1541A	IS200/IS605	IS200	Yersinia pseudotuberculosis	135	3e-29
	IS200F	IS200/IS605	IS200	Salmonella typhimurium	127	6e-27
	IS1541C	IS200/IS605	IS200	Yersinia enterocolitica	127	6e-27
	IS200	IS200/IS605	IS200	Salmonella typhimurium	111	4e-22
	IS200H	IS200/IS605	IS200	Salmonella abortusovis	103	9e-20
	ISCro3	IS4		Citrobacter rodentium	67.9	5e-09
	ISTvi2	IS1182		Thiocystis violascens	44.1	0.074
	ISEc46	IS200/IS605	IS605	Escherichia coli	44.1	0.074
	ISXo9	IS5	IS5	Xanthomonas oryzae	44.1	0.074
	ISXca5	IS5	IS5	Xanthomonas campestris	44.1	0.074
	ISCARN10	IS200/IS605	IS200	Metagenomic data	44.1	0.074
	ISXoo4	IS5	IS5	Xanthomonas oryzae	44.1	0.074
	ISPlge4	IS110	IS1111	Pluralibacter gergoviae	42.1	0.29
	ISPsy33	IS4	IS4	Pseudomonas syringae	42.1	0.29
	ISAsp2	ISAs1		Anabaena sp.	42.1	0.29
	ISBrsp2	IS1182		Bradyrhizobium sp.	42.1	0.29
	ISSfl8	IS110	IS1111	Shigella flexneri	42.1	0.29
	ISBli33	IS3	IS3	Brevibacterium linens	40.1	1.2
	ISCbo10	IS607		Clostridium botulinum	40.1	1.2
	ISBrsp3	IS630		Bradyrhizobium sp.	38.2	4.5
	ISPye35	IS630		Paracoccus yeei	38.2	4.5
	ISCausp3	IS1595	ISNha5	Caulobacter sp.	38.2	4.5
	ISSpgl1	IS1595	ISPna2	Sporosarcina globispora	38.2	4.5
	ISRhtr1	IS1595	ISSod11	Rhizobium sp.	38.2	4.5
	ISHvo13	IS4	ISH8	Haloferax volcanii	38.2	4.5
	ISSpwi2	IS256		Sphingomonas wittichii	38.2	4.5
	ISRle11	IS1182		Rhizobium leguminosarum	38.2	4.5
	ISXo4	IS5	IS5	Xanthomonas oryzae	38.2	4.5
	ISCpr2	IS3	IS2	Candidatus Protochlamydia	38.2	4.5
	ISMhu10	IS5		Methanospirillum hungatei	38.2	4.5
	ISMhu4	IS1634		Methanospirillum hungatei	38.2	4.5
	ISMbov3	IS1634		Mycoplasma bovis	38.2	4.5
	ISSc1	IS30		Spiroplasma citri	38.2	4.5
	IS1634	IS1634		Mycoplasma mycoides	38.2	4.5
	IS1066	IS630		Pseudomonas sp.	38.2	4.5
Contig 13	IS1X2	IS1		Escherichia vulneris	145	2e-32
	IS1X1	IS1		Shigella flexneri	145	2e-32
	IS1X4	IS1		Escherichia hermannii	137	4e-30
	IS1F	IS1		Escherichia coli	137	4e-30
	ISSen9	IS1		Salmonella enterica	129	1e-27
	IS1X3	IS1		Escherichia fergusonii	129	1e-27
	IS1S	IS1		Shigella sonnei	129	1e-27
	IS1R	IS1		Escherichia coli	129	1e-27
	IS1D	IS1		Escherichia coli	129	1e-27
	IS1A	IS1		Escherichia coli	129	1e-27
	ISKpn14	IS1		Klebsiella pneumoniae	121	3e-25
	IS1G	IS1		Escherichia coli	121	3e-25
	IS1B	IS1		Escherichia coli	121	3e-25
	IS1SD	IS1		Shigella dysenteriae	119	1e-24
	ISPa43	Tn3		Pseudomonas aeruginosa	54.0	5e-05
	IS621	IS110		Escherichia coli	54.0	5e-05
	MITEPlu5	IS630		Photorhabdus luminescens	50.1	0.0008
	ISBli23	IS481		Brevibacterium linens	46.1	0.013
	ISRso6	IS21		Ralstonia solanacearum	46.1	0.013
	ISAzvi5	IS4	IS10	Azotobacter vinelandii	42.1	0.20
	ISMtsp17	IS110	IS1111	Methylobacterium sp.	40.1	0.78
	ISSod13	IS481		Shewanella oneidensis	40.1	0.78
	ISPa100	IS5	IS5	Pseudomonas aeruginosa	38.2	3.1
	ISTusp1	IS1595	ISPna2	Turicibacter sp.	38.2	3.1
	ISPpu29	IS3	IS150	Pseudomonas putida	38.2	3.1
	ISAisp5	IS1595	ISSod11	Acidovorax sp.	38.2	3.1
	ISEal1	IS3	IS3	Escherichia albertii	38.2	3.1
	ISCep1	ISKra4	ISAzba1	Crinalium epipsammum	38.2	3.1
	ISDssp2	ISAzo13		Desulfobacterium sp.	38.2	3.1
	ISSyth2	IS1182		Symbiobacterium thermophilum	38.2	3.1
	ISMno30	ISL3		Methylobacterium nodulans	38.2	3.1
	ISMav7	IS1380		Mycobacterium avium	38.2	3.1
	ISAar10	IS1380		Arthrobacter arilaitensis	38.2	3.1
	ISCARN9	IS1634		Metagenomic data	38.2	3.1
	ISGdi13	IS1182		Gluconacetobacter diazotrophicus	38.2	3.1
	ISCausp2	IS1595	ISNha5	Caulobacter sp.	38.2	3.1
	ISRpa4	IS1595	ISNha5	Rhodopseudomonas palustris	38.2	3.1
	ISShes4	IS200/IS605	IS200	Shewanella sp.	38.2	3.1
	ISBlma5	IS3	IS407	Blastopirellula marina	38.2	3.1
	ISLpn6	IS4	IS50	Legionella pneumophila	38.2	3.1
	ISCsp2	IS1595	ISSod11	Comamonas sp.	38.2	3.1
	ISAisp1	IS1595	ISSod11	Acidovorax sp.	38.2	3.1
	ISMma17	IS630		Methanosarcina mazei	38.2	3.1
	ISBaov1	IS1380	IS942	Bacteroides ovatus	38.2	3.1
	ISSod2	IS3	IS407	Shewanella oneidensis	38.2	3.1
	ISSiac1	IS701		Singulisphaera acidiphila	38.2	3.1
	ISRm14	IS66		Sinorhizobium meliloti	38.2	3.1
Contig 14	IS621	IS110		Escherichia coli	60.0	8e-07
	MITEPlu5	IS630		Photorhabdus luminescens	44.1	0.048
	ISCco2	IS1595	ISPna2	Campylobacter coli	40.1	0.75
	ISArsp6	Tn3		Arthrobacter sp.	40.1	0.75
	ISPye27	IS110	IS1111	Paracoccus yeei	38.2	3.0
	MITEYpe1	IS630		Yersinia pestis	38.2	3.0
	ISMesp4	ISNCY	ISDol1	Mesorhizobium sp.	38.2	3.0
	ISAar19	ISL3		Arthrobacter arilaitensis	38.2	3.0
	ISAcma16	IS4	IS4	Acaryochloris marina	38.2	3.0
	ISCARN89	IS21		Metagenomic data	38.2	3.0
	ISGdi3	IS5	IS1031	Gluconacetobacter diazotrophicus	38.2	3.0
	ISDge14	IS701		Deinococcus geothermalis	38.2	3.0
	ISGlo2	IS1595	IS1595	Geobacter lovleyi	38.2	3.0
	ISLrh4	ISLre2		Lactobacillus rhamnosus	38.2	3.0
	ISClte1	IS3	IS150	Clostridium tetani	38.2	3.0
	IS883	IS66		Ralstonia eutropha	38.2	3.0
	ISFtu4	IS982		Francisella tularensis	38.2	3.0
Contig 15	IS3H	IS3	IS3	Shigella dysenteriae	91.7	2e-16
	IS3F	IS3	IS3	Escherichia fergusonii	83.8	5e-14
	ISEc17	IS3	IS3	Escherichia coli	75.8	1e-11
	IS3	IS3	IS3	Escherichia coli	75.8	1e-11
	ISVa12	IS66		Vibrio anguillarum	46.1	0.011
	ISVa9	IS66		Vibrio anguillarum	46.1	0.011
	ISSty2	IS3	IS3	Salmonella typhimurium	46.1	0.011
	ISMmy1	IS1634		Mycoplasma mycoides	40.1	0.66
	ISPsy37	IS3	IS3	Pseudomonas syringae	38.2	2.6
	ISJsp3	IS21		Janthinobacterium sp	38.2	2.6
	ISRsu1	IS5	IS903	Rhodovulum sulfidophilum	38.2	2.6
	ISHade1	IS200/IS605	IS1341	Haloferax denitrificans	38.2	2.6
	ISNma17	IS200/IS605	IS1341	Natrialba magadii	38.2	2.6
	ISMgi2	IS1182		Mycobacterium gilvum	38.2	2.6
	ISButh4	IS5	IS5	Burkholderia thailandensis	38.2	2.6
	ISMch6	IS110		Methylobacterium chloromethanicum	38.2	2.6
	ISSav5	IS481		Streptomyces avermitilis	38.2	2.6
	ISAli7	IS256		Azospirillum lipoferum	38.2	2.6
	ISMrsp4	IS66	ISBst12	Marinobacter sp.	38.2	2.6
	ISHne5	IS110		Hyphomonas neptunium	38.2	2.6
	ISGpr3	IS3	IS51	Marine gamma	38.2	2.6
	ISTvo4	IS1634		Thermoplasma volcanium	38.2	2.6
Contig 16	IS621	IS110		Escherichia coli	69.9	7e-10
	ISSod19	IS110	IS1111	Shewanella oneidensis	44.1	0.040
	ISMth3	IS5	IS903	Methanosaeta thermophila	42.1	0.16
	ISPye50	IS5	IS427	Paracoccus yeei	40.1	0.62
	ISPa77	IS21		Pseudomonas aeruginosa	40.1	0.62
	ISAbe5	IS1595	IS1016	Acinetobacter bereziniae	40.1	0.62
	ISHam2	IS200/IS605	IS1341	Haloarcula amylolytica	40.1	0.62
	ISAfe11	IS607		Acidithiobacillus ferrooxidans	40.1	0.62
	ISPpu7	IS21		Pseudomonas putida	40.1	0.62
	IS1491	IS21		Pseudomonas alcaligenes	40.1	0.62
	ISSen11	IS21		Salmonella enterica	38.2	2.5
	ISEsa2	IS110		Enterobacter sakazakii	38.2	2.5
	ISAcma24	IS701		Acaryochloris marina	38.2	2.5
	ISAeh1	IS66		Alkalilimnicola ehrlichei	38.2	2.5
	ISBcen14	IS66		Burkholderia cenocepacia	38.2	2.5
	ISMac10	IS1634		Methanosarcina acetivorans	38.2	2.5
	ISButh3	IS256		Burkholderia thailandensis	36.2	9.7
	ISBlma6	IS4	IS4	Blastopirellula marina	36.2	9.7
	ISAs35	IS66	ISBst12	Aeromonas salmonicida	36.2	9.7
	ISStin5	IS3	IS150	Streptococcus iniae	36.2	9.7
	ISThde1	IS1595		Thiobacillus denitrificans	36.2	9.7
	ISSsu9	IS1595	ISPna2	Streptococcus suis	36.2	9.7
	ISKox2	Tn3		Klebsiella oxytoca	36.2	9.7
	ISMesp4	ISNCY	ISDol1	Mesorhizobium sp.	36.2	9.7
	ISHel1	IS200/IS605	IS1341	Haloferax elongans	36.2	9.7
	ISCbo9	IS607		Clostridium botulinum	36.2	9.7
	ISBf13	IS4	IS10	Bacteroides fragilis	36.2	9.7
	ISAfe17	IS3	IS150	Acidithiobacillus ferrivorans	36.2	9.7
	ISLbi1	ISNCY	ISLbi1	Leptospira biflexa	36.2	9.7
	ISPa37	IS30		Pseudomonas aeruginosa	36.2	9.7
	ISDha15	IS1634		Desulfitobacterium dichloroeliminans	36.2	9.7
	ISAzs17	Tn3		Azospirillum sp.	36.2	9.7
	ISPaes3	IS256		Paracoccus aestuarii	36.2	9.7
	ISRssp12	IS1182		Roseovarius sp.	36.2	9.7
	ISButh5	IS5		Burkholderia thailandensis	36.2	9.7
	ISDal2	IS5	IS5	Desulfatibacillum alkenivorans	36.2	9.7
	ISRhru4	IS256		Rhodospirillum rubrum	36.2	9.7
	ISCli1	IS1380		Corynebacterium lipophiloflavum	36.2	9.7
	ISCph9	IS1380		Chlorobium phaeobacteroides	36.2	9.7
	ISDth1	IS1380		Desulfonatronospira thiodismutans	36.2	9.7
	ISBrsp2	IS1182		Bradyrhizobium sp.	36.2	9.7
	ISMdi8	IS481		Methylobacterium dichloromethanicum	36.2	9.7
	ISCARN89	IS21		Metagenomic data	36.2	9.7
	ISGob2	IS66	ISBst12	Gemmata obscuriglobus	36.2	9.7
	ISBun1	IS1595	ISNwi1	Bacteroides uniformis	36.2	9.7
	ISBth5	IS4	IS231	Bacillus thuringiensis	36.2	9.7
	ISMysp2	IS1595	ISSod11	Mycobacterium sp.	36.2	9.7
	ISMfl2	IS1595	ISSod11	Mycobacterium flavescens	36.2	9.7
	ISSfl1	IS4	IS10	Shigella flexneri	36.2	9.7
	ISHs1	ISH6		Halobacterium salinarum	36.2	9.7
	ISH6	ISH6		Halobacterium salinarum	36.2	9.7
	IS651	ISL3		Bacillus halodurans	36.2	9.7
	IS1676	IS1380		Rhodococcus erythropolis	36.2	9.7
Contig 17	MITEYpe1	IS630		Yersinia pestis	67.9	3e-09
	ISAusp1	IS1595	ISNha5	Aurantimonas sp.	44.1	0.040
	ISHarch18	IS200/IS605	IS1341	Halophilic archaeon	40.1	0.62
	ISMme1	ISAzo13		Mesorhizobium metallidurans	40.1	0.62
	ISMtsp7	IS110	IS1111	Methylobacterium sp.	40.1	0.62
	ISShes14	IS3	IS51	Shewanella sp.	40.1	0.62
	ISSpu5	IS21		Shewanella putrefaciens	40.1	0.62
	ISPa125	IS256		Pseudomonas aeruginosa	38.2	2.5
	ISHmu6	IS200/IS605	IS605	Halomicrobium mukohataei	38.2	2.5
	ISMdi10	IS110	IS1111	Methylobacterium dichloromethanicum	38.2	2.5
	ISAcma8	IS701		Acaryochloris marina	38.2	2.5
	ISBj7_B	IS66		Bradyrhizobium japonicum	38.2	2.5
	ISShes13	IS3	IS3	Shewanella sp.	38.2	2.5
	ISStac1	IS110	IS1111	Streptomyces aculeolatus	38.2	2.5
	ISNgo2	IS110		Neisseria gonorrhoeae	38.2	2.5
	ISPsy3	IS91		Pseudomonas syringae	38.2	2.5
	IS1403	IS3	IS407	Xanthomonas campestris	38.2	2.5
	ISArsp14	ISNCY		Arthrobacter sp.	36.2	9.7
	ISHahy8	IS30		Halanaerobium hydrogeniformans	36.2	9.7
	ISAcde2	IS1595	ISPna2	Acidovorax delafieldii	36.2	9.7
	ISLad1	IS3	IS3	Leclercia adecarboxylata	36.2	9.7
	ISRme20	IS21		Ralstonia metallidurans	36.2	9.7
	ISH36	IS200/IS605	IS605	Halobacterium salinarum	36.2	9.7
	ISMal1	ISKra4	ISAzba1	Mesorhizobium alhagi	36.2	9.7
	ISPkr1	IS21		Paracoccus koreensis	36.2	9.7
	ISMno31	IS3	IS150	Methylobacterium nodulans	36.2	9.7
	ISPam4	IS5	IS427	Paracoccus aminophilus	36.2	9.7
	ISPph3	IS1380		Pelodictyon phaeoclathratiforme	36.2	9.7
	ISBha1	IS1380		Bacillus halodurans	36.2	9.7
	ISAcma32	IS630		Acaryochloris marina	36.2	9.7
	ISCARN101	IS3	IS3	Metagenomic data	36.2	9.7
	ISCARN97	IS110		Metagenomic data	36.2	9.7
	ISCARN64	IS3	IS3	Metagenomic data	36.2	9.7
	ISPa27	IS256		Pseudomonas aeruginosa	36.2	9.7
	ISSpu15	IS21		Shewanella putrefaciens	36.2	9.7
	ISGdi6	IS630		Gluconacetobacter diazotrophicus	36.2	9.7
	ISApr6	IS66		Alpha proteobacterium	36.2	9.7
	ISOba3	IS1	ISMhu11	Oceanicola batsensis	36.2	9.7
	ISMrsp4	IS66	ISBst12	Marinobacter sp.	36.2	9.7
	IS1553	IS256		Mycobacterium tuberculosis	36.2	9.7
	ISMsm7	IS3	IS3	Mycobacterium smegmatis	36.2	9.7
	ISGvi5	IS3	IS3	Gloeobacter violaceus	36.2	9.7
	ISBam1	IS3	IS150	Burkholderia ambifaria	36.2	9.7
	ISSod5	IS256		Shewanella oneidensis	36.2	9.7
	ISC1395	IS630		Sulfolobus solfataricus	36.2	9.7
	ISPst9	ISL3		Pseudomonas stutzeri	36.2	9.7
	ISEc8	IS66		Escherichia coli	36.2	9.7
	ISSod2	IS3	IS407	Shewanella oneidensis	36.2	9.7
	ISFlsp1	IS21		Flavobacterium sp	36.2	9.7
	ISBsm1	IS701		Bacillus smithii	36.2	9.7
	ISRsp1	IS66		Rhizobium sp.	36.2	9.7
	ISAav1	IS21		Acidovorax avenae	36.2	9.7
	IS1631	IS21		Bradyrhizobium japonicum	36.2	9.7
	IS1389-B	IS3	IS407	Xanthomonas campestris	36.2	9.7
	IS1389	IS3	IS407	Xanthomonas campestris	36.2	9.7
	IS1111C	IS110	IS1111	Coxiella burnetii	36.2	9.7
	IS1111A	IS110	IS1111	Coxiella burnetii	36.2	9.7
Contig 18	ISEc1	ISAs1		Escherichia coli	844	0.0
	ISEc5	ISAs1		Escherichia coli	797	0.0
	IS1397	IS3	IS150	Escherichia coli	113	5e-23
	ISEc17	IS3	IS3	Escherichia coli	99.6	8e-19
	IS3H	IS3	IS3	Shigella dysenteriae	99.6	8e-19
	IS3	IS3	IS3	Escherichia coli	91.7	2e-16
	ISEc40	IS630		Escherichia coli	85.7	1e-14
	IS3F	IS3	IS3	Escherichia fergusonii	75.8	1e-11
	IS621	IS110		Escherichia coli	69.9	7e-10
	ISPeat2	IS3	IS3	Pectobacterium atrosepticum	67.9	3e-09
	ISSty2	IS3	IS3	Salmonella typhimurium	67.9	3e-09
	IS1230B	IS3	IS3	Salmonella enteritidis	67.9	3e-09
	ISCfr27	IS630		Citrobacter freundii	60.0	7e-07
	ISEal1	IS3	IS3	Escherichia albertii	60.0	7e-07
	ISEc16	IS3	IS3	Escherichia coli	60.0	7e-07
	ISPlu3	IS630		Photorhabdus luminescens	56.0	1e-05
	ISAzs17	Tn3		Azospirillum sp.	52.0	0.0002
	ISSe1	ISAs1		Salmonella enterica	52.0	0.0002
	ISPst2	ISL3		Pseudomonas stutzeri	50.1	0.0006
	ISSri1	ISKra4	ISKra4	Streptomyces rimosus	42.1	0.15
	ISVa13	ISAs1		Vibrio anguillarum	40.1	0.61
	ISEc26	ISAs1		Escherichia coli	40.1	0.61
	ISPpr10	ISAs1		Photobacterium profundum	40.1	0.61
	ISPlu19	IS630		Photorhabdus luminescens	38.2	2.4
	ISNfl1	ISNCY	ISDol1	Nostoc flagelliforme	38.2	2.4
	ISSfu1	IS1380		Syntrophobacter fumaroxidans	38.2	2.4
	ISStma11	ISL3		Stenotrophomonas maltophilia	38.2	2.4
	ISCARN39	IS630		Metagenomic data	38.2	2.4
	ISBrsp5	IS66	ISBst12	Bradyrhizobium sp.	38.2	2.4
	ISBvi3	IS3	IS3	Burkholderia vietnamiensis	38.2	2.4
	IS1405	IS5	IS5	Ralstonia solanacearum	38.2	2.4
	ISBli29	ISNCY		Brevibacterium linens	36.2	9.5
	Tn2	Tn3		Escherichia coli	36.2	9.5
	ISStin4	IS30		Streptococcus iniae	36.2	9.5
	ISPaen5	IS1595		Paenibacillus sp.	36.2	9.5
	ISCldi1	IS1595	ISPna2	Clostridium disporicum	36.2	9.5
	ISCsp3	IS21		Comamonas sp.	36.2	9.5
	ISVa15	IS630		Vibrio anguillarum	36.2	9.5
	ISKpn31	ISAs1		Klebsiella pneumoniae	36.2	9.5
	ISH34	IS200/IS605	IS605	Halobacterium salinarum	36.2	9.5
	ISDpr9	ISAzo13		Delta proteobacterium	36.2	9.5
	ISSer2	IS256		Saccharopolyspora erythraea	36.2	9.5
	ISGpo1	IS256		Gordonia polyisoprenivorans	36.2	9.5
	ISAba22	IS3	IS3	Acinetobacter baumannii	36.2	9.5
	ISClsp3	IS1182		Clostridium sp.	36.2	9.5
	ISEc32	IS110		Escherichia coli	36.2	9.5
	ISMpo8	IS5	IS427	Methylobacterium populi	36.2	9.5
	ISCwa5	IS1380		Crocosphaera watsonii	36.2	9.5
	ISSsu5	IS1380		Streptococcus suis	36.2	9.5
	ISCysp7	ISAs1		Cyanothece sp.	36.2	9.5
	ISCARN82	IS5	IS1031	Metagenomic data	36.2	9.5
	ISYps3	Tn3		Yersinia pseudotuberculosis	36.2	9.5
	ISSpu6	IS3	IS3	Shewanella putrefaciens	36.2	9.5
	ISAzo9	IS630		Azoarcus sp.	36.2	9.5
	ISDsp2	IS3	IS407	Dehalococcoides sp.	36.2	9.5
	ISMbu7	ISH3		Methanococcoides burtonii	36.2	9.5
	ISMac7	IS200/IS605	IS605	Methanosarcina acetivorans	36.2	9.5
	ISMma1	ISH3		Methanosarcina mazei	36.2	9.5
	ISPpu9	IS110		Pseudomonas putida	36.2	9.5
	Tn3	Tn3		Salmonella enterica	36.2	9.5
	IS492	IS110		Pseudomonas atlantica	36.2	9.5
Contig 19	IS200C	IS200/IS605	IS200	Escherichia coli	145	1e-32
	IS200F	IS200/IS605	IS200	Salmonella typhimurium	127	3e-27
	IS200	IS200/IS605	IS200	Salmonella typhimurium	123	5e-26
	IS1541D	IS200/IS605	IS200	Yersinia enterocolitica	119	8e-25
	IS200H	IS200/IS605	IS200	Salmonella abortusovis	111	2e-22
	IS1541C	IS200/IS605	IS200	Yersinia enterocolitica	107	3e-21
	IS200G	IS200/IS605	IS200	Yersinia pestis	103	5e-20
	IS1541A	IS200/IS605	IS200	Yersinia pseudotuberculosis	103	5e-20
	IS1541B	IS200/IS605	IS200	Yersinia pseudotuberculosis	101	2e-19
	ISEch5	IS200/IS605	IS200	Dickeya dadantii	81.8	2e-13
	ISCosp2	IS1595	ISSod11	Colwellia sp.	40.1	0.58
	ISErsp1	IS481		Erwinia sp.	40.1	0.58
	ISCARN43	IS1595	ISPna2	Metagenomic data	40.1	0.58
	ISPye8	IS66		Paracoccus yeei	38.2	2.3
	ISRma1	ISKra4	ISKra4	Rhodopirellula maiorica	38.2	2.3
	ISTco2	ISLre2		Thermobacillus composti	38.2	2.3
	ISTco1	ISLre2		Thermobacillus composti	38.2	2.3
	ISCbo2	IS21		Clostridium botulinum	38.2	2.3
	ISRm33	IS5	IS903	Sinorhizobium meliloti	38.2	2.3
	ISStsp1	ISAzo13		Streptomyces sp.	38.2	2.3
	ISAcma8	IS701		Acaryochloris marina	38.2	2.3
	ISHar4	IS30		Herminiimonas arsenicoxydans	38.2	2.3
	ISPpa1	IS256		Paracoccus pantotrophus	38.2	2.3
	ISEfa15	IS21		Enterococcus faecium	36.2	9.0
	ISThli1	IS1595	ISNha5	Thalassobaculum litoreum	36.2	9.0
	ISThde1	IS1595		Thiobacillus denitrificans	36.2	9.0
	ISAeme5	IS66		Aeromonas media	36.2	9.0
	ISAeme4	IS4	ISH8	Aeromonas media	36.2	9.0
	ISHtu6	IS200/IS605	IS1341	Haloterrigena turkmenica	36.2	9.0
	ISHwa30	IS1595	ISH4	Haloquadratum walsbyi	36.2	9.0
	ISNma12	IS200/IS605	IS605	Natrialba magadii	36.2	9.0
	ISNamo17	IS200/IS605	IS605	Natronomonas moolapensis	36.2	9.0
	ISDpr10	ISKra4	ISKra4	Delta proteobacterium	36.2	9.0
	ISMama1	IS256		Magnetococcus marinus	36.2	9.0
	ISRel8	IS66		Rhizobium etli	36.2	9.0
	ISPso3	IS5	IS5	Paracoccus solventivorans	36.2	9.0
	ISApr9	IS1380		Alpha proteobacterium	36.2	9.0
	ISMhu2	IS1182		Methanospirillum hungatei	36.2	9.0
	ISMdi18	IS1595	ISNwi1	Methylobacterium dichloromethanicum	36.2	9.0
	ISMex16	IS3	IS150	Methylobacterium extorquens	36.2	9.0
	ISStma11	ISL3		Stenotrophomonas maltophilia	36.2	9.0
	ISAcr3	ISAs1		Acidiphilium cryptum	36.2	9.0
	ISCARN20	IS110		Metagenomic data	36.2	9.0
	ISMno3	IS66	ISBst12	Methylobacterium nodulans	36.2	9.0
	ISDge10	IS200/IS605	IS605	Deinococcus geothermalis	36.2	9.0
	ISStag1	IS6		Stappia aggregata	36.2	9.0
	ISSisp1	IS3	IS407	Silicibacter sp.	36.2	9.0
	ISEc16	IS3	IS3	Escherichia coli	36.2	9.0
	ISPa42	Tn3		Pseudomonas aeruginosa	36.2	9.0
	IS71	IS66		Agrobacterium tumefaciens	36.2	9.0
	IS3502	IS3	IS51	Corynebacterium jeikeium	36.2	9.0
	IS3000	Tn3		Escherichia coli	36.2	9.0
	IS1086	IS30		Ralstonia eutropha	36.2	9.0
Contig 20	ISCcl1	IS256		Clostridium clariflavum	42.1	0.14
	ISHti15	IS1595	ISH4	Halorhabdus tiamatea	40.1	0.55
	ISBth167	IS3	IS150	Bacillus thuringiensis	40.1	0.55
	ISNisp2	IS1595	ISNwi1	Nitrobacter sp.	40.1	0.55
	ISCfr26	IS110	IS1111	Citrobacter freundii	38.2	2.2
	ISBrsp3	IS630		Bradyrhizobium sp.	38.2	2.2
	ISAzs1	IS701		Azospirillum sp.	38.2	2.2
	ISRel11	IS5	IS427	Rhizobium etli	38.2	2.2
	ISMae36	ISL3		Microcystis aeruginosa	38.2	2.2
	ISMae8	ISAs1		Microcystis aeruginosa	38.2	2.2
	ISCARN22	IS66		Metagenomic data	38.2	2.2
	ISOgr3	IS5	IS903	Oceanicola granulosus	38.2	2.2
	ISApr2	IS1595	ISSod11	Alpha proteobacterium	38.2	2.2
	ISEam1	IS3	IS51	Erwinia amylovora	38.2	2.2
	ISSm1	IS110	IS1111	Serratia marcescens	38.2	2.2
	IS1618	IS110	IS1111	Yersinia pestis	38.2	2.2
	ISBcen4	IS110	IS1111	Burkholderia cenocepacia	38.2	2.2
	ISLad6	IS110	IS1111	Leclercia adecarboxylata	36.2	8.6
	ISPa85	IS21		Pseudomonas aeruginosa	36.2	8.6
	ISEc76	IS110	IS1111	Escherichia coli	36.2	8.6
	TnBth3	Tn3		Bacillus thuringiensis	36.2	8.6
	ISMeal1	IS1595	IS1595	Methylomicrobium alcaliphilum	36.2	8.6
	ISPman1	IS21		Pseudomonas mandelii	36.2	8.6
	ISVa15	IS630		Vibrio anguillarum	36.2	8.6
	ISVa7	ISL3		Vibrio anguillarum	36.2	8.6
	ISGys1	ISNCY	ISDol1	Gynuella sunshinyii	36.2	8.6
	ISPpu23	IS21		Pseudomonas putida	36.2	8.6
	ISHti13	IS4	ISH8	Halorhabdus tiamatea	36.2	8.6
	TnEc1	Tn3		Escherichia coli	36.2	8.6
	ISBlo16	IS256	IS1249	Bifidobacterium longum	36.2	8.6
	ISArsp6	Tn3		Arthrobacter sp.	36.2	8.6
	ISArsp3	IS110		Arthrobacter sp.	36.2	8.6
	ISRm32	IS1595	ISNwi1	Sinorhizobium meliloti	36.2	8.6
	ISGdi12	IS701		Gluconacetobacter diazotrophicus	36.2	8.6
	ISSham2	IS3	IS51	Shewanella amazonensis	36.2	8.6
	ISPsy20	IS21		Pseudomonas syringae	36.2	8.6
	ISSpwi1	IS3	IS407	Sphingomonas wittichii	36.2	8.6
	ISGpr2	IS3	IS51	Gamma proteobacterium	36.2	8.6
	ISGur1	IS4	ISPepr1	Geobacter uraniumreducens	36.2	8.6
	ISMmy3	IS3	IS150	Mycoplasma mycoides	36.2	8.6
	ISSeq10	ISAs1		Streptococcus equi	36.2	8.6
	ISCg2	IS30		Corynebacterium glutamicum	36.2	8.6
	IS662	IS1182		Bacillus halodurans	36.2	8.6
Contig 21	IS1397	IS3	IS150	Escherichia coli	1057	0.0
	IS621	IS110		Escherichia coli	48.1	0.002
	ISPlsp1	IS3	IS150	Polynucleobacter sp.	44.1	0.035
	ISBam1	IS3	IS150	Burkholderia ambifaria	44.1	0.035
	ISRso11	IS3	IS150	Ralstonia solanacearum	44.1	0.035
	ISRcl1	IS1595	ISSod11	Rubrimonas cliftonensis	42.1	0.14
	ISEcB1	IS3	IS150	Escherichia coli	42.1	0.14
	ISRme12	IS3	IS150	Ralstonia metallidurans	42.1	0.14
	ISBcen16	IS3	IS150	Burkholderia cenocepacia	42.1	0.14
	ISBmu5	IS3	IS150	Burkholderia multivorans	40.1	0.55
	ISAba17	IS66		Acinetobacter baumannii	40.1	0.55
	ISCARN1	IS607		Metagenomic data	40.1	0.55
	ISBli21	IS21		Brevibacterium linens	38.2	2.2
	ISHli12	IS200/IS605	IS1341	Halohasta litchfieldiae	38.2	2.2
	ISHla4	IS5	ISH1	Halorubrum lacusprofundi	38.2	2.2
	ISMtsp9	IS110		Methylobacterium sp.	38.2	2.2
	ISFsp13	ISAzo13		Frankia sp.	38.2	2.2
	ISScl2	ISAzo13		Streptomyces clavuligerus	38.2	2.2
	ISBce18	IS3	IS150	Bacillus cereus	38.2	2.2
	ISAar36	IS21		Arthrobacter arilaitensis	38.2	2.2
	ISCph9	IS1380		Chlorobium phaeobacteroides	38.2	2.2
	ISApr11	IS1380		Alpha proteobacterium	38.2	2.2
	ISWen3	IS66	ISBst12	Wolbachia endosymbiont	38.2	2.2
	ISBmu6	IS3	IS150	Burkholderia multivorans	38.2	2.2
	ISPa25	IS110	IS1111	Pseudomonas aeruginosa	38.2	2.2
	ISHne1	IS3	IS51	Hyphomonas neptunium	38.2	2.2
	ISKpn53	IS3	IS407	Klebsiella pneumoniae	36.2	8.6
	ISEcl10	IS3	IS407	Enterobacter cloacae	36.2	8.6
	ISAur1	IS1595	ISPna2	Actinobacillus ureae	36.2	8.6
	ISSko1	IS110	IS1111	Stenotrophomonas koreensis	36.2	8.6
	ISPpn1	IS21		Pandoraea pnomenusa	36.2	8.6
	ISTars1	IS1182		Thiomonas arsenitoxydans	36.2	8.6
	ISThsp22	IS1182		Thiomonas sp.	36.2	8.6
	ISBba1	IS1595	ISSod11	Burkholderiaceae bacterium	36.2	8.6
	ISPle1	ISKra4	ISMich2	Pleurocapsa sp.	36.2	8.6
	ISEc41	IS200/IS605	IS605	Escherichia coli	36.2	8.6
	ISClhy1	IS1182		Clostridium hylemonae	36.2	8.6
	ISBusp3	IS5		Burkholderia sp.	36.2	8.6
	ISPfr21	IS481		Propionibacterium freudenreichii	36.2	8.6
	ISPfr12	IS3	IS51	Propionibacterium freudenreichii	36.2	8.6
	IS684	IS66		Pseudomonas syringae	36.2	8.6
	IS679	IS66		Escherichia coli	36.2	8.6
	ISMex5	IS3	IS407	Methylobacterium extorquens	36.2	8.6
	ISBusp2	IS5	IS5	Burkholderia sp.	36.2	8.6
	ISBrsp6	IS66		Bradyrhizobium sp.	36.2	8.6
	ISSod25	IS91		Shewanella oneidensis	36.2	8.6
	ISSisp1	IS3	IS407	Silicibacter sp.	36.2	8.6
	ISXo18	IS3	IS407	Xanthomonas oryzae	36.2	8.6
	ISXo17	IS3	IS407	Xanthomonas oryzae	36.2	8.6
	ISBmu11	IS3	IS150	Burkholderia multivorans	36.2	8.6
	ISShsp3	IS3	IS3	Sphingomonas sp.	36.2	8.6
	ISPsy28	IS3	IS3	Pseudomonas syringae	36.2	8.6
	ISFal1	ISL3		Frankia alni	36.2	8.6
	ISH20	ISH3		Haloarcula marismortui	36.2	8.6
	ISFsp1	ISL3		Frankia sp.	36.2	8.6
	ISFsp3	IS21		Frankia sp.	36.2	8.6
	ISPa11	IS110	IS1111	Pseudomonas aeruginosa	36.2	8.6
	ISGsu3	IS5		Geobacter sulfurreducens	36.2	8.6
	ISKpn1	IS3	IS150	Klebsiella pneumoniae	36.2	8.6
	IS5Sa2	IS5	IS1031	Synechocystis sp.	36.2	8.6
	IS3000	Tn3		Escherichia coli	36.2	8.6
	IS231W	IS4	IS231	Bacillus thuringiensis	36.2	8.6
	IS231V	IS4	IS231	Bacillus thuringiensis	36.2	8.6
	IS1351	IS3	IS407	Salmonella enteritidis	36.2	8.6
Contig 22	IS630	IS630		Shigella sonnei	1164	0.0
	ISEc33	IS630		Escherichia coli	624	5e-177
	ISSpu2	IS630		Shewanella putrefaciens	404	8e-111
	MITESen1	Tn3		Salmonella enterica	280	3e-73
	IS102	IS5	IS903	Escherichia coli	248	1e-63
	ISEhe1	IS630		Erwinia herbicola	234	2e-59
	IS903B	IS5	IS903	Escherichia coli	234	2e-59
	IS903	IS5	IS903	Escherichia coli	228	1e-57
	ISSfl1	IS4	IS10	Shigella flexneri	204	2e-50
	ISPan1	IS5	IS903	Pantoea ananatis	133	5e-29
	ISPeat1	IS630		Pectobacterium atrosepticum	121	2e-25
	ISSfl9	IS4	IS10	Shigella flexneri	97.6	3e-18
	ISEc30	IS1		Escherichia coli	81.8	2e-13
	IS1N	IS1		Shigella dysenteriae	81.8	2e-13
	ISPlu16	IS630		Photorhabdus luminescens	56.0	9e-06
	ISEc60	IS4	IS10	Escherichia coli	54.0	4e-05
	ISCro2	IS4	IS10	Citrobacter rodentium	54.0	4e-05
	TnEc1	Tn3		Escherichia coli	52.0	0.0001
	ISSoEn1	IS5	IS903	Primary endosymbiont	52.0	0.0001
	ISErsp1	IS481		Erwinia sp.	48.1	0.002
	ISEcl3	IS5	IS903	Enterobacter cloacae	44.1	0.034
	ISSod16	IS630		Shewanella oneidensis	44.1	0.034
	ISAeme16	IS630		Aeromonas media	42.1	0.14
	ISAs8	IS1		Aeromonas salmonicida	42.1	0.14
	IS1H	IS1		Escherichia coli	42.1	0.14
	ISLead3	IS1		Leclercia adcarboxglata	40.1	0.54
	ISPsko1	IS66		Pseudomonas koreensis	40.1	0.54
	ISHsal12	IS200/IS605	IS1341	Halobacterium salinarum	40.1	0.54
	ISCno1	IS1182		Clostridium novyi	40.1	0.54
	ISEic1	IS1		Edwardsiella ictaluri	40.1	0.54
	ISCte5	IS5		Comamonas testosteroni	40.1	0.54
	ISPlu10	IS630		Photorhabdus luminescens	40.1	0.54
	ISAba46	IS66		Acinetobacter baumannii	38.2	2.1
	ISKpn40	IS3	IS150	Klebsiella pneumoniae	38.2	2.1
	ISPa65	IS21		Pseudomonas aeruginosa	38.2	2.1
	ISAs13	IS5	IS903	Aeromonas salmonicida	38.2	2.1
	ISBj9	IS701		Bradyrhizobium japonicum	38.2	2.1
	ISAhy2	IS630		Aeromonas hydrophila	38.2	2.1
	ISCla2	ISLre2		Caldicellulosiruptor lactoaceticus	38.2	2.1
	ISSen5	IS630		Salmonella enterica	38.2	2.1
	ISAba16	IS66		Acinetobacter baumannii	38.2	2.1
	ISShvi2	IS4	IS4	Shewanella violacea	38.2	2.1
	ISSyth2	IS1182		Symbiobacterium thermophilum	38.2	2.1
	ISPlc1	IS5	IS903	Paracoccus alcaliphilus	38.2	2.1
	ISSoc3	IS200/IS605	IS605	Synechococcus sp.	38.2	2.1
	ISSpo9	IS5	IS903	Silicibacter pomeroyi	38.2	2.1
	ISEc20	IS110		Escherichia coli	38.2	2.1
	ISNha2	IS701		Nitrobacter hamburgensis	38.2	2.1
	ISNha1	IS701		Nitrobacter hamburgensis	38.2	2.1
	ISTvo2	ISNCY	ISA1214	Thermoplasma volcanium	38.2	2.1
	ISSfl4	IS110		Shigella flexneri	38.2	2.1
	ISSco1	IS481		Streptomyces coelicolor	38.2	2.1
	IS1652	IS481		Streptomyces coelicolor	38.2	2.1
	IS1649	IS481		Streptomyces coelicolor	38.2	2.1
	IS1181	ISL3		Staphylococcus aureus	38.2	2.1
	ISBj18	IS110	IS1111	Bradyrhizobium japonicum	36.2	8.4
	ISAcp3	IS5	IS427	Acidobacterium capsulatum	36.2	8.4
	ISPcc1	IS4	IS10	Pectobacterium carotovorum	36.2	8.4
	ISElsp1	IS3	IS3	Elizabethkingia sp.	36.2	8.4
	ISMsa1	IS1595	ISPna2	Marinobacter salarius	36.2	8.4
	ISPto10	IS1595	ISSod11	Psychroflexus torquis	36.2	8.4
	ISPda2	IS91		Photobacterium damselae	36.2	8.4
	ISPpu25	IS110	IS1111	Pseudomonas putida	36.2	8.4
	TnXo19	Tn3		Xanthomonas oryzae	36.2	8.4
	ISAco1	IS1182		Anaerostipes coli	36.2	8.4
	ISLpn13	IS1182		Legionella pneumophila	36.2	8.4
	ISSgl1	IS5	IS903	Sodalis glossinidius	36.2	8.4
	ISDol1	ISNCY	ISDol1	Desulfococcus oleovorans	36.2	8.4
	ISArsp6	Tn3		Arthrobacter sp.	36.2	8.4
	ISSpo7	IS5	IS427	Silicibacter pomeroyi	36.2	8.4
	ISAnsp13	ISAs1		Anaeromyxobacter sp.	36.2	8.4
	ISMex13	IS21		Methylobacterium extorquens	36.2	8.4
	ISCARN78	IS21		Metagenomic data	36.2	8.4
	ISAfe2	IS256		Acidithiobacillus ferrooxidans	36.2	8.4
	ISShes5	IS4	IS10	Shewanella sp.	36.2	8.4
	ISApl3	IS3	IS150	Actinobacillus pleuropneumoniae	36.2	8.4
	ISCba1	IS1595	ISPna2	Clostridium bartlettii	36.2	8.4
	ISApl2	IS3	IS150	Actinobacillus pleuropneumoniae	36.2	8.4
	ISXo15	IS701		Xanthomonas oryzae	36.2	8.4
	ISSav4	IS701		Streptomyces avermitilis	36.2	8.4
	IS1595	IS1595	IS1595	Xanthomonas campestris	36.2	8.4
	ISAs4	IS5	IS903	Aeromonas salmonicida	36.2	8.4
	ISPfu5	IS6		Pyrococcus furiosus	36.2	8.4
	ISMt2	IS21		Mycobacterium tuberculosis	36.2	8.4
	ISSeq1	ISL3		Streptococcus equi	36.2	8.4
Contig 23	IS200C	IS200/IS605	IS200	Escherichia coli	147	3e-33
	IS200F	IS200/IS605	IS200	Salmonella typhimurium	137	3e-30
	ISEch5	IS200/IS605	IS200	Dickeya dadantii	129	6e-28
	IS200G	IS200/IS605	IS200	Yersinia pestis	129	6e-28
	IS1541B	IS200/IS605	IS200	Yersinia pseudotuberculosis	129	6e-28
	IS1541A	IS200/IS605	IS200	Yersinia pseudotuberculosis	129	6e-28
	IS200	IS200/IS605	IS200	Salmonella typhimurium	125	1e-26
	IS1541C	IS200/IS605	IS200	Yersinia enterocolitica	121	2e-25
	IS200H	IS200/IS605	IS200	Salmonella abortusovis	113	4e-23
	IS1541D	IS200/IS605	IS200	Yersinia enterocolitica	113	4e-23
	ISSoEn2	IS256		Primary endosymbiont	65.9	8e-09
	ISEic2	IS256		Edwardsiella ictaluri	58.0	2e-06
	ISKpn47	IS256		Klebsiella pneumoniae	54.0	3e-05
	IS1414	IS256		Escherichia coli	50.1	0.0005
	ISCARN10	IS200/IS605	IS200	Metagenomic data	44.1	0.029
	TnXo19	Tn3		Xanthomonas oryzae	38.2	1.8
	ISCco2	IS1595	ISPna2	Campylobacter coli	38.2	1.8
	ISXne3	ISAs1		Xenorhabdus nematophila	38.2	1.8
	ISSri1	ISKra4	ISKra4	Streptomyces rimosus	38.2	1.8
	ISNpu1	IS1182		Nostoc punctiforme	38.2	1.8
	ISMae10	IS1634		Microcystis aeruginosa	38.2	1.8
	ISCph2	IS4	IS4Sa	Chlorobium phaeobacteroides	38.2	1.8
	ISBthe1	IS4	IS4Sa	Bacteroides thetaiotaomicron	38.2	1.8
	IS1182	IS1182		Staphylococcus aureus	38.2	1.8
	ISAlw34	IS66		Acinetobacter lwoffii	36.2	7.1
	ISAba49	IS66		Acinetobacter baumannii	36.2	7.1
	ISXpo1	IS110	IS1111	Xenorhabdus poinarii	36.2	7.1
	ISBeb2	IS1595	ISPna2	Betaproteobacteria bacterium	36.2	7.1
	ISAba25	IS66		Acinetobacter baumannii	36.2	7.1
	ISEc51	ISKra4	ISAzba1	Escherichia sp.	36.2	7.1
	ISSm3	IS110		Serratia marcescens	36.2	7.1
	ISAba16	IS66		Acinetobacter baumannii	36.2	7.1
	ISCsa8	IS1634		Caldicellulosiruptor saccharolyticus	36.2	7.1
	ISCph11	ISAzo13		Chlorobium phaeobacteroides	36.2	7.1
	ISDre4	IS1380		Desulfotomaculum reducens	36.2	7.1
	ISVsa6	IS982		Aliivibrio salmonicida	36.2	7.1
	ISVme1	IS66		Vibrio metschnikovii	36.2	7.1
	ISGdi5	IS630		Gluconacetobacter diazotrophicus	36.2	7.1
	ISSde4	IS110	IS1111	Shewanella denitrificans	36.2	7.1
	ISButh2	IS3	IS2	Burkholderia thailandensis	36.2	7.1
	ISFac6	IS1634		Ferroplasma acidarmanus	36.2	7.1
	ISBcen6	IS3	IS2	Burkholderia cenocepacia	36.2	7.1
	ISPlu15	ISNCY	ISPlu15	Photorhabdus luminescens	36.2	7.1
	ISAba1	IS4	IS10	Acinetobacter baumannii	36.2	7.1
	IS1481A	IS4	IS10	Xanthomonas campestris	36.2	7.1
	IS1253B	IS200/IS605	IS605	Dichelobacter nodosus	36.2	7.1
	IS1253A	IS200/IS605	IS605	Dichelobacter nodosus	36.2	7.1
	IS1221F	IS3	IS150	Mycoplasma hyorhinis	36.2	7.1
Contig 24	ISEc1	ISAs1		Escherichia coli	2097	0.0
	ISEc5	ISAs1		Escherichia coli	2042	0.0
	IS1H	IS1		Escherichia coli	1515	0.0
	IS1N	IS1		Shigella dysenteriae	283	2e-74
	ISEc30	IS1		Escherichia coli	172	4e-41
	ISAcma2	ISAs1		Acaryochloris marina	50.1	0.0004
	ISSe1	ISAs1		Salmonella enterica	46.1	0.007
	ISKpn31	ISAs1		Klebsiella pneumoniae	44.1	0.026
	ISVa13	ISAs1		Vibrio anguillarum	42.1	0.10
	ISShes14	IS3	IS51	Shewanella sp.	40.1	0.40
	ISBrsp6	IS66		Bradyrhizobium sp.	40.1	0.40
	ISEc26	ISAs1		Escherichia coli	40.1	0.40
	ISYps7	IS1		Yersinia pseudotuberculosis	40.1	0.40
	ISVvu1	IS1		Vibrio vulnificus	40.1	0.40
	ISArsp16	ISNCY		Arthrobacter sp.	38.2	1.6
	ISHsal16	IS630		Halobacterium salinarum	38.2	1.6
	ISPye37	IS66		Paracoccus yeei	38.2	1.6
	ISPmi3	IS1		Proteus mirabilis	38.2	1.6
	ISPa77	IS21		Pseudomonas aeruginosa	38.2	1.6
	ISFlsp3	IS1595	ISSod11	Flavobacterium sp.	38.2	1.6
	ISFlc1	IS1595	ISSod11	Flavobacterium columnare	38.2	1.6
	ISFlsp2	IS1595	ISSod11	Flavobacterium sp.	38.2	1.6
	ISHarch3	IS200/IS605	IS1341	Halophilic archaeon	38.2	1.6
	ISStma11	ISL3		Stenotrophomonas maltophilia	38.2	1.6
	ISVsa13	ISAs1		Aliivibrio salmonicida	38.2	1.6
	ISAs8	IS1		Aeromonas salmonicida	38.2	1.6
	ISPpr12	ISAs1		Photobacterium profundum	38.2	1.6
	ISXo16	IS1595	IS1595	Xanthomonas oryzae	38.2	1.6
	ISPpu7	IS21		Pseudomonas putida	38.2	1.6
	ISPa87	IS21		Pseudomonas aeruginosa	36.2	6.3
	ISPsy41	IS21		Pseudomonas syringae	36.2	6.3
	ISPsy40	IS21		Pseudomonas syringae	36.2	6.3
	ISRsp21	IS1595	ISSod11	Rhodospira trueperi	36.2	6.3
	TnXax1	Tn3		Xanthomonas axonopodis	36.2	6.3
	ISThma1	ISNCY	ISDol1	Thiocapsa marina	36.2	6.3
	ISXci1	IS21		Xanthomonas citri	36.2	6.3
	ISRme20	IS21		Ralstonia metallidurans	36.2	6.3
	ISPa40	Tn3		Pseudomonas aeruginosa	36.2	6.3
	ISAzs18	IS66		Azospirillum sp.	36.2	6.3
	ISPna5	IS5	IS903	Polaromonas naphthalenivorans	36.2	6.3
	ISMra1	IS3	IS407	Methylobacterium radiotolerans	36.2	6.3
	ISPfr16	IS30		Propionibacterium freudenreichii	36.2	6.3
	ISMav6	IS110		Mycobacterium avium	36.2	6.3
	ISAar30	ISL3		Arthrobacter arilaitensis	36.2	6.3
	ISMgi1	IS1380		Mycobacterium gilvum	36.2	6.3
	ISDeac1	IS1380		Delftia acidovorans	36.2	6.3
	ISPsp5	IS1182		Pseudomonas sp.	36.2	6.3
	ISTha2	ISAs1		Thauera sp.	36.2	6.3
	ISAisp4	IS110		Acidovorax sp.	36.2	6.3
	ISPre4	IS21		Pseudomonas resinovorans	36.2	6.3
	ISRpa7	ISAs1		Rhodopseudomonas palustris	36.2	6.3
	ISSod15	IS3	IS3	Shewanella oneidensis	36.2	6.3
	ISRhba1	IS1595	ISNwi1	Rhodobacterales bacterium	36.2	6.3
	ISCbe1	IS607		Caldicellulosiruptor bescii	36.2	6.3
	ISAzvi7	IS4	IS50	Azotobacter vinelandii	36.2	6.3
	IS885	IS630		Ralstonia eutropha	36.2	6.3
	ISPa42	Tn3		Pseudomonas aeruginosa	36.2	6.3
Contig 25	IS1X2	IS1		Escherichia vulneris	153	4e-35
	IS1SD	IS1		Shigella dysenteriae	153	4e-35
	IS1S	IS1		Shigella sonnei	153	4e-35
	IS1R	IS1		Escherichia coli	153	4e-35
	IS1G	IS1		Escherichia coli	153	4e-35
	IS1B	IS1		Escherichia coli	153	4e-35
	IS1A	IS1		Escherichia coli	153	4e-35
	IS1D	IS1		Escherichia coli	145	1e-32
	ISSen9	IS1		Salmonella enterica	137	2e-30
	IS1X4	IS1		Escherichia hermannii	129	6e-28
	ISKpn14	IS1		Klebsiella pneumoniae	93.7	3e-17
	IS1X3	IS1		Escherichia fergusonii	93.7	3e-17
	IS1F	IS1		Escherichia coli	79.8	5e-13
	IS1X1	IS1		Shigella flexneri	71.9	1e-10
	IS621	IS110		Escherichia coli	61.9	1e-07
	ISBli4	IS1380		Brevibacterium linens	38.2	1.6
	ISAar12	IS1380		Arthrobacter arilaitensis	38.2	1.6
	IS1062	IS30		Enterococcus faecalis	38.2	1.6
	ISRj1	IS630		Bradyrhizobium japonicum	38.2	1.6
	ISPmo2	IS5	IS5	Pseudomonas monteilii	36.2	6.3
	ISEch11	IS110		Dickeya dadantii	36.2	6.3
	ISVei4	IS630		Verminephrobacter eiseniae	36.2	6.3
	ISClba2	IS1595	ISPna2	Clostridiales bacterium	36.2	6.3
	TnXo19	Tn3		Xanthomonas oryzae	36.2	6.3
	ISHla19	IS200/IS605	IS605	Halorubrum lacusprofundi	36.2	6.3
	ISNamo19	IS200/IS605	IS605	Natronomonas moolapensis	36.2	6.3
	ISAcce1	ISKra4	ISKra4	Acetivibrio cellulolyticus	36.2	6.3
	ISMae18	ISKra4	ISMich2	Microcystis aeruginosa	36.2	6.3
	ISHal1	IS200/IS605	IS605	Haloferax alexandrinus	36.2	6.3
	ISPa37	IS30		Pseudomonas aeruginosa	36.2	6.3
	ISAzs34	ISNCY	IS892	Azospirillum sp.	36.2	6.3
	ISUnCu14	IS66		uncultured bacterium	36.2	6.3
	ISPpa6	IS5	IS427	Paracoccus pantotrophus	36.2	6.3
	ISPth1	IS5	IS903	Paracoccus thiocyanatus	36.2	6.3
	ISShwo3	IS110		Shewanella woodyi	36.2	6.3
	ISAar11	IS1380		Arthrobacter arilaitensis	36.2	6.3
	ISMex23	IS200/IS605	IS1341	Methylobacterium extorquens	36.2	6.3
	ISCARN67	IS110		Metagenomic data	36.2	6.3
	ISCARN62	ISNCY	IS1202	Metagenomic data	36.2	6.3
	ISCARN29	IS1595	ISPna2	Metagenomic data	36.2	6.3
	ISCARN21	IS630		Metagenomic data	36.2	6.3
	ISMhu11	IS1	ISMhu11	Methanospirillum hungatei	36.2	6.3
	ISSpn5	IS1380		Streptococcus pneumoniae	36.2	6.3
	ISLxx6	IS5	IS427	Leifsonia xyli	36.2	6.3
	ISPpu19	IS66		Pseudomonas putida	36.2	6.3
	ISLpn8	IS3	IS407	Legionella pneumophila	36.2	6.3
	ISSod9	Tn3		Shewanella oneidensis	36.2	6.3
	ISMyma2	IS1380		Mycobacterium marinum	36.2	6.3
	ISBmu1	IS21		Burkholderia multivorans	36.2	6.3
	ISPa11	IS110	IS1111	Pseudomonas aeruginosa	36.2	6.3
	IS866	IS66		Agrobacterium tumefaciens	36.2	6.3
	IS2000	IS5	IS5	Pseudomonas aeruginosa	36.2	6.3
	IS1248B	IS5	IS427	Paracoccus denitrificans	36.2	6.3
	IS1248A	IS5	IS427	Paracoccus denitrificans	36.2	6.3
	IS1021	IS5	IS5	Ralstonia solanacearum	36.2	6.3
Contig 26	IS1397	IS3	IS150	Escherichia coli	280	2e-73
	ISPlu15	ISNCY	ISPlu15	Photorhabdus luminescens	40.1	0.36
	IS1071	Tn3		Alcaligenes sp.	40.1	0.36
	ISCARN3	IS21		Metagenomic data	38.2	1.4
	ISSde1	IS4	IS10	Shewanella denitrificans	38.2	1.4
	ISPsp2	ISL3		Pseudomonas sp.	38.2	1.4
	IS1515	IS5	ISL2	Streptococcus pneumoniae	38.2	1.4
	IS1411	ISL3		Pseudomonas sp.	38.2	1.4
	ISArsp16	ISNCY		Arthrobacter sp.	36.2	5.6
	ISAbe16	IS3	IS150	Acinetobacter bereziniae	36.2	5.6
	ISLmo5	IS3		Listeria monocytogenes	36.2	5.6
	ISAcpr1	IS1595		Acidihalobacter prosperus	36.2	5.6
	ISVasp1	IS21		Variovorax sp.	36.2	5.6
	ISPpn1	IS21		Pandoraea pnomenusa	36.2	5.6
	ISRpa10	IS1182		Rhodopseudomonas palustris	36.2	5.6
	ISHamu1	IS200/IS605	IS1341	Haloferax mucosum	36.2	5.6
	ISMfu1	ISAzo13		Myxococcus fulvus	36.2	5.6
	ISWpi13	IS110		Wolbachia pipientis	36.2	5.6
	ISOan4	IS5	IS903	Octadecabacter antarcticus	36.2	5.6
	ISRel24	IS66		Rhizobium etli	36.2	5.6
	ISPna1	IS630		Polaromonas naphthalenivorans	36.2	5.6
	ISPre3	IS66		Pseudomonas resinovorans	36.2	5.6
	IS1661	IS3	IS150	Yersinia pestis	36.2	5.6
Contig 27	ISEc1	ISAs1		Escherichia coli	1516	0.0
	ISEc5	ISAs1		Escherichia coli	1485	0.0
	ISSe1	ISAs1		Salmonella enterica	50.1	0.0004
	ISKpn31	ISAs1		Klebsiella pneumoniae	44.1	0.023
	ISAcma2	ISAs1		Acaryochloris marina	42.1	0.089
	ISLead2	ISAs1		Leclercia adcarboxglata	40.1	0.35
	ISNagr11	IS200/IS605	IS1341	Natronobacterium gregoryi	38.2	1.4
	ISSysp7	ISKra4	ISAzba1	Synechococcus sp.	38.2	1.4
	ISPpr12	ISAs1		Photobacterium profundum	38.2	1.4
	ISCef4	IS4	IS4	Corynebacterium efficiens	38.2	1.4
	ISPal1	IS5	IS427	Pseudomonas alcaligenes	38.2	1.4
	IS401	IS3	IS51	Burkholderia cepacia	38.2	1.4
	IS1629	ISAs1		Streptomyces sp.	38.2	1.4
	ISHahy5	IS3		Halanaerobium hydrogeniformans	36.2	5.5
	ISCalsp1	IS1595		Caldithrix sp.	36.2	5.5
	ISDssp5	ISNCY	ISDol1	Desulfobacterium sp.	36.2	5.5
	ISHsr1	IS200/IS605	IS1341	Halogranum salarium	36.2	5.5
	ISBith1	IS256	IS1249	Bifidobacterium thermophilum	36.2	5.5
	ISCre2	IS256	IS1249	Corynebacterium resistens	36.2	5.5
	ISNamo12	IS6		Natronomonas moolapensis	36.2	5.5
	ISPa40	Tn3		Pseudomonas aeruginosa	36.2	5.5
	ISPaen3	IS5	IS427	Paenibacillus sp.	36.2	5.5
	ISAnsp14	IS256		Anaeromyxobacter sp.	36.2	5.5
	ISMav7	IS1380		Mycobacterium avium	36.2	5.5
	ISThsp14	ISL3		Thiomonas sp.	36.2	5.5
	ISAzo12	IS21		Azoarcus sp.	36.2	5.5
	ISVei5	IS5	IS5	Verminephrobacter eiseniae	36.2	5.5
	ISShfr5	IS21		Shewanella frigidimarina	36.2	5.5
	ISStau2	IS66	ISBst12	Stigmatella aurantiaca	36.2	5.5
	ISRta4	IS110		Ralstonia taiwanensis	36.2	5.5
	ISPepr5	IS21		Pelobacter propionicus	36.2	5.5
	ISVpa3	IS5	IS903	Vibrio parahaemolyticus	36.2	5.5
	ISRhosp1	IS3	IS3	Rhodococcus sp.	36.2	5.5
	ISMbu8	ISH3		Methanococcoides burtonii	36.2	5.5
	ISC1257	IS256	ISC1250	Sulfolobus solfataricus	36.2	5.5
	ISMac7	IS200/IS605	IS605	Methanosarcina acetivorans	36.2	5.5
	ISClte1	IS3	IS150	Clostridium tetani	36.2	5.5
	ISSau1	IS30		Staphylococcus aureus	36.2	5.5
	ISSc1	IS30		Spiroplasma citri	36.2	5.5
	IS1630	IS30		Mycoplasma fermentans	36.2	5.5
	IS1245	IS256		Mycobacterium avium	36.2	5.5
Contig 28	MITEEc1	IS630		Escherichia coli	236	3e-60
	MITEYpe1	IS630		Yersinia pestis	61.9	9e-08
	ISAsp2	ISAs1		Anabaena sp.	42.1	0.081
	ISLrh2	IS5	IS5	Lactobacillus rhamnosus	40.1	0.32
	ISPa85	IS21		Pseudomonas aeruginosa	38.2	1.3
	ISHth3	IS4	IS4Sa	Halococcus thailandensis	38.2	1.3
	ISAs16	IS110	IS1111	Aeromonas salmonicida	38.2	1.3
	ISHala2	ISH6		Halobiforma lacisalsi	38.2	1.3
	ISHaha4	IS3	IS150	Halobacillus halophilus	38.2	1.3
	ISCARN112	ISNCY	IS1202	Metagenomic data	38.2	1.3
	ISCausp4	IS1595	ISNha5	Caulobacter sp.	36.2	5.0
	ISPlba2	IS1595	ISSod11	Planctomycetes bacterium	36.2	5.0
	ISDeba1	ISNCY	ISDol1	Desulfobulbaceae bacterium	36.2	5.0
	ISAeme1	ISAs1		Aeromonas media	36.2	5.0
	ISKol1	IS21		Kosmotoga olearia	36.2	5.0
	ISMex8	IS21		Methylobacterium extorquens	36.2	5.0
	ISAli5	IS3	IS150	Azospirillum lipoferum	36.2	5.0
	ISUnCu3	IS21		Uncultured bacterium	36.2	5.0
	ISCps7	IS110		Colwellia psychrerythraea	36.2	5.0
	ISAzvi8	IS701		Azotobacter vinelandii	36.2	5.0
	IS14999	IS630		Corynebacterium glutamicum	36.2	5.0
	IS232	IS21		Bacillus thuringiensis	36.2	5.0
	IS1491	IS21		Pseudomonas alcaligenes	36.2	5.0
Contig 29	ISPlu16	IS630		Photorhabdus luminescens	40.1	0.31
	IS1533	IS110	IS1111	Leptospira borgpetersenii	40.1	0.31
	ISBsa1	IS256		Blastococcus saxobsidens	38.2	1.2
	ISNamo4	IS5		Natronomonas moolapensis	38.2	1.2
	ISWpi15	IS256		Wolbachia pipientis	38.2	1.2
	ISHwa20	IS5		Haloquadratum walsbyi	38.2	1.2
	ISAar33	IS21		Arthrobacter arilaitensis	38.2	1.2
	ISSep1	IS1182		Staphylococcus epidermidis	38.2	1.2
	ISChth1	ISAs1		Chloroherpeton thalassium	38.2	1.2
	ISPpr13	IS200/IS605	IS200	Photobacterium profundum	38.2	1.2
	ISCb2	IS4	IS231	Clostridium beijerincki	38.2	1.2
	ISVvu1	IS1		Vibrio vulnificus	38.2	1.2
	ISPa4	ISNCY		Pseudomonas aeruginosa	38.2	1.2
	IS1630	IS30		Mycoplasma fermentans	38.2	1.2
	IS1251	ISL3		Enterococcus faecium	38.2	1.2
	ISCbo9	IS607		Clostridium botulinum	36.2	4.9
	ISSysp7	ISKra4	ISAzba1	Synechococcus sp.	36.2	4.9
	ISDere1	ISKra4	ISKra4	Desulfohalobium retbaense	36.2	4.9
	ISCbe6	IS256		Caldicellulosiruptor bescii	36.2	4.9
	ISRssp4	IS30		Roseovarius sp.	36.2	4.9
	ISEbi1	IS66		Eubacterium biforme	36.2	4.9
	ISFnu2	IS1182		Fusobacterium nucleatum	36.2	4.9
	ISCth6	IS110		Clostridium thermocellum	36.2	4.9
	ISWen3	IS66	ISBst12	Wolbachia endosymbiont	36.2	4.9
	ISArch18	IS1	ISMhu11	Uncultured archaeon	36.2	4.9
	ISLsa2	IS3	IS150	Lactobacillus sakei	36.2	4.9
	ISCahy1	ISNCY		Caldicellulosiruptor hydrothermalis	36.2	4.9
	ISMasp1	IS1634		Magnetococcus sp.	36.2	4.9
	ISCku3	IS4	IS231	Candidatus Kuenenia	36.2	4.9
	ISSau9	IS21		Staphylococcus aureus	36.2	4.9
	ISMae27	IS630		Microcystis aeruginosa	36.2	4.9
	ISMba13	IS1634		Methanosarcina barkeri	36.2	4.9
	ISMth1	IS630		Methanosaeta thermophila	36.2	4.9
	ISCbt3	IS607		Clostridium botulinum	36.2	4.9
	ISSep2	IS110		Staphylococcus epidermidis	36.2	4.9
	ISFnu4	IS110		Fusobacterium nucleatum	36.2	4.9
	ISHp608	IS200/IS605	IS605	Helicobacter pylori	36.2	4.9
	IS1634	IS1634		Mycoplasma mycoides	36.2	4.9
Contig 30	IS150	IS3	IS150	Escherichia coli	153	3e-35
	IS103	IS3	IS150	Escherichia coli	153	3e-35
	ISKpn8	IS3	IS150	Klebsiella pneumoniae	121	1e-25
	IS621	IS110		Escherichia coli	83.8	2e-14
	ISDvu4	IS481		Desulfovibrio vulgaris	42.1	0.076
	ISLcr1	ISLre2		Lactobacillus crispatus	40.1	0.30
	ISAlw2	IS1		Acinetobacter lwoffii	38.2	1.2
	ISKpn50	IS66		Klebsiella pneumoniae	38.2	1.2
	MITEEc1	IS630		Escherichia coli	38.2	1.2
	ISMtsp18	IS3	IS2	Methylobacterium sp.	38.2	1.2
	ISUnCu12	IS1380		Uncultured marine	38.2	1.2
	ISSba20	IS21		Shewanella baltica	38.2	1.2
	ISAli20	Tn3		Azospirillum lipoferum	38.2	1.2
	ISAma4	IS66	ISBst12	Alteromonas macleodii	38.2	1.2
	ISEc8	IS66		Escherichia coli	38.2	1.2
	ISMt3	IS21		Mycobacterium tuberculosis	38.2	1.2
	ISMbo1	IS21		Mycobacterium bovis	38.2	1.2
	IS222	IS3	IS3	Pseudomonas aeruginosa	38.2	1.2
	ISAsh1	IS1595	ISSod11	Alicyclobacillus shizuokensis	36.2	4.7
	ISBce21	IS1595	ISPna2	Bacillus cereus	36.2	4.7
	TnAs2	Tn3		Aeromonas salmonicida	36.2	4.7
	ISAs20	IS3	IS3	Aeromonas salmonicida	36.2	4.7
	ISHsa1	ISH6		Halococcus salifodinae	36.2	4.7
	ISRel19	IS66		Rhizobium etli	36.2	4.7
	ISAtu6	IS66		Agrobacterium tumefaciens	36.2	4.7
	ISAar20	ISL3		Arthrobacter arilaitensis	36.2	4.7
	ISArch2	IS1182		Uncultured archaeon	36.2	4.7
	ISAcma37	IS701		Acaryochloris marina	36.2	4.7
	ISCARN103	IS1182		Metagenomic data	36.2	4.7
	ISAli6	IS256		Azospirillum lipoferum	36.2	4.7
	ISBcen26	IS481		Burkholderia cenocepacia	36.2	4.7
	ISApr1	IS3	IS3	Alpha proteobacterium	36.2	4.7
	ISRme1	IS5		Ralstonia metallidurans	36.2	4.7
	ISHp608	IS200/IS605	IS605	Helicobacter pylori	36.2	4.7
	IS240F	IS6		Bacillus thuringiensis	36.2	4.7
	IS1151	IS4	IS231	Clostridium perfringens	36.2	4.7
	IS1131	IS66		Agrobacterium tumefaciens	36.2	4.7
	IS1066	IS630		Pseudomonas sp.	36.2	4.7
Contig 31	IS621	IS110		Escherichia coli	44.1	0.017
	ISEc51	ISKra4	ISAzba1	Escherichia sp.	42.1	0.066
	ISFtu1	IS630		Francisella tularensis	42.1	0.066
	ISMac7	IS200/IS605	IS605	Methanosarcina acetivorans	40.1	0.26
	ISAlw8	IS4	IS50	Acinetobacter lwoffii	38.2	1.0
	ISEc58	IS256		Escherichia coli	38.2	1.0
	ISPam2	IS5	IS903	Paracoccus aminophilus	38.2	1.0
	ISLhe2	ISL3		Lactobacillus helveticus	38.2	1.0
	ISEch12	IS3	IS407	Dickeya dadantii	36.2	4.1
	ISPye56	IS5	IS903	Paracoccus yeei	36.2	4.1
	ISPye41	IS5	IS903	Paracoccus yeei	36.2	4.1
	ISPye23	IS5	IS903	Paracoccus yeei	36.2	4.1
	Tn4430	Tn3		Bacillus thuringiensis	36.2	4.1
	ISAba40	IS5	IS903	Acinetobacter baumannii	36.2	4.1
	ISNtsp2	ISNCY	ISDol1	Nitrosomonas sp.	36.2	4.1
	ISSymo1	ISNCY	ISDol1	Candidatus Symbiobacter	36.2	4.1
	ISSyth4	ISLre2		Symbiobacterium thermophilum	36.2	4.1
	ISMno23	IS91		Methylobacterium nodulans	36.2	4.1
	ISCARN102	IS630		Metagenomic data	36.2	4.1
	ISMasp6	IS5	IS427	Magnetococcus sp.	36.2	4.1
Contig 32	ISNpu13	Tn3		Nostoc punctiforme	46.1	0.004
	ISAlw20	IS982		Acinetobacter lwoffii	40.1	0.26
	ISMbov3	IS1634		Mycoplasma bovis	40.1	0.26
	ISHp1	IS1595	ISPna2	Helicobacter pylori	38.2	1.0
	ISSsu7	IS110		Streptococcus suis	38.2	1.0
	MICBce1	IS4	IS231	Bacillus cereus	38.2	1.0
	ISCsa3	IS110		Caldicellulosiruptor saccharolyticus	38.2	1.0
	ISFba3	IS1182		Flavobacteria bacterium	38.2	1.0
	ISAma2	IS3	IS407	Alteromonas macleodii	38.2	1.0
	IS231W	IS4	IS231	Bacillus thuringiensis	38.2	1.0
	IS231V	IS4	IS231	Bacillus thuringiensis	38.2	1.0
	ISKpn60	IS110		Klebsiella pneumoniae	36.2	4.0
	ISMaca1	IS21		Macrococcus canis	36.2	4.0
	ISTeha5	IS4	IS4Sa	Tetragenococcus halophilus	36.2	4.0
	ISEc77	IS4	IS10	Escherichia coli	36.2	4.0
	ISMobv1	IS1595	IS1016	Moraxella bovoculi	36.2	4.0
	ISAs30	IS4	IS4	Aeromonas salmonicida	36.2	4.0
	ISLgar3	IS982		Lactococcus garvieae	36.2	4.0
	ISLla3	IS3	IS150	Lactococcus lactis	36.2	4.0
	ISVha2	IS1182		Vibrio harveyi	36.2	4.0
	ISBpu1	IS1182		Bacillus pumilus	36.2	4.0
	ISCco1	IS200/IS605	IS605	Campylobacter coli	36.2	4.0
	ISTel2	IS200/IS605	IS605	Thermosynechococcus elongatus	36.2	4.0
	ISBf9	ISAs1		Bacteroides fragilis	36.2	4.0
	ISKpn10	IS3	IS407	Klebsiella pneumoniae	36.2	4.0
	ISBvu2	IS1595	ISNwi1	Bacteroides vulgatus	36.2	4.0
	ISSwo1	IS3	IS150	Syntrophomonas wolfei	36.2	4.0
	ISMae3	IS1		Microcystis aeruginosa	36.2	4.0
	ISWz1	IS91		Weeksella zoohelcum	36.2	4.0
	IS1634	IS1634		Mycoplasma mycoides	36.2	4.0
	IS13869	ISL3		Brevibacterium lactofermentum	36.2	4.0
Contig 33	TnAs2	Tn3		Aeromonas salmonicida	40.1	0.24
	ISTsu3	IS1182		Thermaerobacter subterraneus	38.2	0.96
	ISAzs21	IS66		Azospirillum sp.	38.2	0.96
	ISMdi27	IS21		Methylobacterium dichloromethanicum	38.2	0.96
	ISMex39	IS21		Methylobacterium extorquens	38.2	0.96
	ISPrre2	IS5	IS903	Providencia rettgeri	36.2	3.8
	ISHmu8	IS200/IS605	IS1341	Halomicrobium mukohataei	36.2	3.8
	ISHph1	IS5	IS903	Hoeflea phototrophica	36.2	3.8
	ISXoo14	IS5		Xanthomonas oryzae	36.2	3.8
	ISCde1	IS66		Candidatus Desulforudis	36.2	3.8
	ISAar37	IS3	IS3	Arthrobacter arilaitensis	36.2	3.8
	ISAde2	IS1182		Anaeromyxobacter dehalogenans	36.2	3.8
	ISApr7	IS1595	ISNwi1	Alpha proteobacterium	36.2	3.8
	ISSpu7	IS1634		Shewanella putrefaciens	36.2	3.8
	ISSham1	IS200/IS605	IS200	Shewanella amazonensis	36.2	3.8
	ISRle7	IS6		Rhizobium leguminosarum	36.2	3.8
	ISMac10	IS1634		Methanosarcina acetivorans	36.2	3.8
	ISPsy31	IS3	IS3	Pseudomonas syringae	36.2	3.8
	IS285	IS256		Yersinia pestis	36.2	3.8
Contig 34	IS200C	IS200/IS605	IS200	Escherichia coli	137	1e-30
	ISEch5	IS200/IS605	IS200	Dickeya dadantii	135	5e-30
	IS200G	IS200/IS605	IS200	Yersinia pestis	135	5e-30
	IS1541D	IS200/IS605	IS200	Yersinia enterocolitica	135	5e-30
	IS1541B	IS200/IS605	IS200	Yersinia pseudotuberculosis	135	5e-30
	IS1541A	IS200/IS605	IS200	Yersinia pseudotuberculosis	135	5e-30
	IS200F	IS200/IS605	IS200	Salmonella typhimurium	127	1e-27
	IS1541C	IS200/IS605	IS200	Yersinia enterocolitica	127	1e-27
	IS200	IS200/IS605	IS200	Salmonella typhimurium	111	7e-23
	IS200H	IS200/IS605	IS200	Salmonella abortusovis	103	2e-20
	ISCARN10	IS200/IS605	IS200	Metagenomic data	44.1	0.014
	ISPa36	IS21		Pseudomonas aeruginosa	40.1	0.22
	ISPna5	IS5	IS903	Polaromonas naphthalenivorans	40.1	0.22
	ISPna4	IS5	IS903	Polaromonas naphthalenivorans	40.1	0.22
	ISPsy20	IS21		Pseudomonas syringae	40.1	0.22
	ISNe2	IS481		Nitrosomonas europaea	40.1	0.22
	ISSty2	IS3	IS3	Salmonella typhimurium	40.1	0.22
	ISNco1	ISNCY	ISDol1	Nitrosomonas communis	38.2	0.88
	ISTha3	IS91		Thauera sp.	38.2	0.88
	ISCau1	IS256	IS1249	Corynebacterium aurimucosum	38.2	0.88
	ISDgi1	IS256		Desulfotomaculum gibsoniae	38.2	0.88
	ISPfr13	IS3	IS51	Propionibacterium freudenreichii	38.2	0.88
	ISPfr1	ISL3		Propionibacterium freudenreichii	38.2	0.88
	ISAzo17	IS21		Azoarcus sp.	38.2	0.88
	ISAfe8	IS200/IS605	IS1341	Acidithiobacillus ferrooxidans	38.2	0.88
	ISL3	ISL3		Lactobacillus delbrueckii	38.2	0.88
	ISRel10	ISNCY	IS1202	Rhizobium etli	36.2	3.5
	ISSis7	IS607		Sulfolobus islandicus	36.2	3.5
	ISHli9	IS6		Halohasta litchfieldiae	36.2	3.5
	ISLdr1	ISKra4	ISKra4	Legionella drancourtii	36.2	3.5
	ISSen5	IS630		Salmonella enterica	36.2	3.5
	ISGho1	IS1182		Grimontia hollisae	36.2	3.5
	ISSgl1	IS5	IS903	Sodalis glossinidius	36.2	3.5
	ISAmu1	IS1595	ISNwi1	Akkermansia muciniphila	36.2	3.5
	ISPfr18	ISL3		Propionibacterium freudenreichii	36.2	3.5
	ISSpo7	IS5	IS427	Silicibacter pomeroyi	36.2	3.5
	ISVer1	IS1595	ISNwi1	Bacterium Ellin514	36.2	3.5
	ISAli18	ISL3		Azospirillum lipoferum	36.2	3.5
	ISTth2	IS4	IS10	Thermus thermophilus	36.2	3.5
	ISSto11	IS607		Sulfolobus tokodaii	36.2	3.5
	ISAe1	ISL3		Ralstonia eutropha	36.2	3.5
Contig 35	IS1X2	IS1		Escherichia vulneris	153	2e-35
	IS1SD	IS1		Shigella dysenteriae	153	2e-35
	IS1S	IS1		Shigella sonnei	153	2e-35
	IS1R	IS1		Escherichia coli	153	2e-35
	IS1G	IS1		Escherichia coli	153	2e-35
	IS1B	IS1		Escherichia coli	153	2e-35
	IS1A	IS1		Escherichia coli	153	2e-35
	IS1D	IS1		Escherichia coli	145	5e-33
	ISSen9	IS1		Salmonella enterica	137	1e-30
	IS1X4	IS1		Escherichia hermannii	129	3e-28
	ISKpn14	IS1		Klebsiella pneumoniae	93.7	2e-17
	IS1X3	IS1		Escherichia fergusonii	93.7	2e-17
	IS1F	IS1		Escherichia coli	79.8	3e-13
	IS1X1	IS1		Shigella flexneri	71.9	6e-11
	ISCasa1	IS1595	ISPna2	Caenispirillum salinarum	40.1	0.22
	ISRsp12	Tn3		Rhizhobium sp.	38.2	0.85
	ISMesi2	IS701	ISAba11	Meiothermus silvanus	38.2	0.85
	ISMex13	IS21		Methylobacterium extorquens	38.2	0.85
	ISArsp7	ISL3		Arthrobacter sp.	36.2	3.4
	ISPye54	IS30		Paracoccus yeei	36.2	3.4
	ISPye47	IS110	IS1111	Paracoccus yeei	36.2	3.4
	Tn5393	Tn3		Erwinia amylovora	36.2	3.4
	ISDuph1	IS1595	ISSod11	Duganella phyllosphaerae	36.2	3.4
	ISShsp4	IS1595	ISSod11	Sphingomonas sp.	36.2	3.4
	ISVa16	IS4	IS4	Vibrio anguillarum	36.2	3.4
	ISSm4	ISL3		Serratia marcescens	36.2	3.4
	ISHaha2	ISL3		Halobacillus halophilus	36.2	3.4
	ISPa38	Tn3		Pseudomonas aeruginosa	36.2	3.4
	ISAzs20	IS66		Azospirillum sp.	36.2	3.4
	ISBusp1	Tn3		Burkholderia sp.	36.2	3.4
	ISMex5	IS3	IS407	Methylobacterium extorquens	36.2	3.4
	ISSod9	Tn3		Shewanella oneidensis	36.2	3.4
	ISMmy2	IS3	IS150	Mycoplasma mycoides	36.2	3.4
	ISAba7	IS5	IS903	Acinetobacter baumannii	36.2	3.4
Contig 36	IS150	IS3	IS150	Escherichia coli	153	2e-35
	IS103	IS3	IS150	Escherichia coli	153	2e-35
	IS200C	IS200/IS605	IS200	Escherichia coli	149	3e-34
	IS200F	IS200/IS605	IS200	Salmonella typhimurium	139	3e-31
	ISEch5	IS200/IS605	IS200	Dickeya dadantii	131	7e-29
	IS200G	IS200/IS605	IS200	Yersinia pestis	131	7e-29
	IS1541B	IS200/IS605	IS200	Yersinia pseudotuberculosis	131	7e-29
	IS1541A	IS200/IS605	IS200	Yersinia pseudotuberculosis	131	7e-29
	IS200	IS200/IS605	IS200	Salmonella typhimurium	123	2e-26
	IS1541C	IS200/IS605	IS200	Yersinia enterocolitica	123	2e-26
	ISKpn8	IS3	IS150	Klebsiella pneumoniae	121	6e-26
	IS200H	IS200/IS605	IS200	Salmonella abortusovis	115	4e-24
	IS1541D	IS200/IS605	IS200	Yersinia enterocolitica	115	4e-24
	ISCARN10	IS200/IS605	IS200	Metagenomic data	44.1	0.012
	ISCysp9	IS1380		Cyanothece sp.	40.1	0.18
	ISDha7	IS3	IS3	Desulfitobacterium hafniense	40.1	0.18
	ISMpo5	IS5	IS1031	Methylobacterium populi	38.2	0.72
	ISMca5	IS256		Methylococcus capsulatus	38.2	0.72
	ISAlw8	IS4	IS50	Acinetobacter lwoffii	36.2	2.9
	ISTvi2	IS1182		Thiocystis violascens	36.2	2.9
	ISBith1	IS256	IS1249	Bifidobacterium thermophilum	36.2	2.9
	ISPa43	Tn3		Pseudomonas aeruginosa	36.2	2.9
	ISBdo1	IS1182		Burkholderia dolosa	36.2	2.9
	ISVsp4	IS66		Verrucomicrobium spinosum	36.2	2.9
	ISRssp4	IS30		Roseovarius sp.	36.2	2.9
	ISXc6	IS5	IS5	Xanthomonas campestris	36.2	2.9
	ISRsp1	IS66		Rhizobium sp.	36.2	2.9
	IS1635	IS6		Yersinia intermedia	36.2	2.9
	IS1478	IS5	IS5	Xanthomonas campestris	36.2	2.9
Contig 37	ISAbe12	IS3	IS3	Acinetobacter bereziniae	38.2	0.70
	ISChpi1	IS1595		Chryseobacterium piperi	38.2	0.70
	ISLca5	IS1595	ISPna2	Lactobacillus casei	36.2	2.8
	MICBce4	IS4	IS231	Bacillus cereus	36.2	2.8
	ISYen4	IS1182		Yersinia enterocolitica	36.2	2.8
	ISSmu2	ISL3		Streptococcus mutans	36.2	2.8
	ISNpu3	IS4	IS4	Nostoc punctiforme	36.2	2.8
Contig 38	ISCro1	IS66		Citrobacter rodentium	2864	0.0
	IS679	IS66		Escherichia coli	2761	0.0
	ISEc45	IS110	IS1111	Escherichia coli	1612	0.0
	IS1X2	IS1		Escherichia vulneris	153	2e-35
	IS1SD	IS1		Shigella dysenteriae	153	2e-35
	IS1S	IS1		Shigella sonnei	153	2e-35
	IS1R	IS1		Escherichia coli	153	2e-35
	IS1G	IS1		Escherichia coli	153	2e-35
	IS1B	IS1		Escherichia coli	153	2e-35
	IS1A	IS1		Escherichia coli	153	2e-35
	IS1D	IS1		Escherichia coli	145	4e-33
	IS1X1	IS1		Shigella flexneri	143	2e-32
	ISSen9	IS1		Salmonella enterica	137	1e-30
	IS1X4	IS1		Escherichia hermannii	135	4e-30
	IS1F	IS1		Escherichia coli	135	4e-30
	IS1X3	IS1		Escherichia fergusonii	127	1e-27
	ISKpn14	IS1		Klebsiella pneumoniae	119	2e-25
	ISKpn50	IS66		Klebsiella pneumoniae	75.8	3e-12
	ISEc83	IS66		Escherichia coli	73.8	1e-11
	ISCfr14	IS66		Citrobacter freundii	61.9	5e-08
	ISKpn24	IS66		Klebsiella pneumoniae	61.9	5e-08
	ISEc8	IS66		Escherichia coli	61.9	5e-08
	ISCfr3	ISNCY	ISPlu15	Citrobacter freundii	60.0	2e-07
	ISEc47	IS66		Escherichia coli	60.0	2e-07
	ISSgsp1	IS66		Shigella sp.	54.0	1e-05
	ISEc22	IS66		Escherichia coli	54.0	1e-05
	ISSfl3	IS66		Shigella flexneri	54.0	1e-05
	ISKpn49	IS66		Klebsiella Pneumoniae	52.0	5e-05
	ISSen7	ISNCY	ISPlu15	Salmonella enterica	52.0	5e-05
	ISSba14	Tn3		Shewanella baltica	50.1	0.0002
	TnEc2	Tn3		Escherichia coli	48.1	0.0007
	ISPsy42	Tn3		Pseudomonas syringae	48.1	0.0007
	ISRhsp5	IS66		Rhodobacter sphaeroides	48.1	0.0007
	IS682	IS66		Escherichia coli	46.1	0.003
	ISEc23	IS66		Escherichia coli	46.1	0.003
	ISEc78	IS66		Escherichia coli	44.1	0.011
	ISDpr4	IS66		delta proteobacterium	42.1	0.044
	ISPba3	IS66		Porphyromonadaceae bacterium	40.1	0.17
	ISRel19	IS66		Rhizobium etli	40.1	0.17
	ISFnu5	ISL3		Fusobacterium nucleatum	40.1	0.17
	ISKpn33	IS66		Klebsiella pneumoniae	38.2	0.69
	ISAba46	IS66		Acinetobacter baumannii	38.2	0.69
	ISMaq1	IS3	IS407	Marinobacter aquaeolei	38.2	0.69
	ISSph1	IS5	IS903	Sphingopyxis sp.	36.2	2.7
	ISKox1	IS66		Klebsiella oxytoca	36.2	2.7
	TnXo19	Tn3		Xanthomonas oryzae	36.2	2.7
	ISSoc12	IS200/IS605	IS1341	Synechococcus sp.	36.2	2.7
	ISEc43	IS66		Escherichia coli	36.2	2.7
	ISAme2	IS1182		Alkaliphilus metalliredigens	36.2	2.7
	ISMex24	ISL3		Methylobacterium extorquens	36.2	2.7
	ISGdi9	IS481		Gluconacetobacter diazotrophicus	36.2	2.7
	ISBlma9	IS66		Blastopirellula marina	36.2	2.7
	ISArch17	IS1		Uncultured archaeon	36.2	2.7
	ISEca11	IS3	IS407	Erwinia carotovora	36.2	2.7
	ISLpn8	IS3	IS407	Legionella pneumophila	36.2	2.7
	ISCausp1	IS3	IS3	Caulobacter sp.	36.2	2.7
	ISPen1	IS4	IS4	Pseudomonas entomophila	36.2	2.7
	ISFac7	IS256		Ferroplasma acidarmanus	36.2	2.7
	ISPpa5	IS66		Paracoccus pantotrophus	36.2	2.7
	ISMi1	IS3	IS150	Mycoplasma incognitus	36.2	2.7
	IS1550	IS3	IS150	Mycoplasma fermentans	36.2	2.7
Contig 39	IS150	IS3	IS150	Escherichia coli	153	1e-35
	IS103	IS3	IS150	Escherichia coli	153	1e-35
	ISKpn8	IS3	IS150	Klebsiella pneumoniae	113	1e-23
	ISSpl1	IS3	IS150	Streptococcus pluranimilium	50.1	0.0001
	ISFnu8	IS3	IS150	Fusobacterium nucleatum	50.1	0.0001
	ISFnu6	IS3	IS150	Fusobacterium nucleatum	50.1	0.0001
	ISRme12	IS3	IS150	Ralstonia metallidurans	46.1	0.002
	ISEch2	IS3	IS150	Dickeya dadantii	42.1	0.036
	ISSth6	IS3	IS150	Streptococcus thermophilus	42.1	0.036
	ISSmu1	IS3	IS150	Streptococcus mutans	42.1	0.036
	IS861	IS3	IS150	Streptococcus agalactiae	42.1	0.036
	ISSis7	IS607		Sulfolobus islandicus	40.1	0.14
	ISSis5	IS607		Sulfolobus islandicus	40.1	0.14
	ISEc23	IS66		Escherichia coli	38.2	0.57
	ISBope1	IS3	IS150	Bordetella petrii	38.2	0.57
	ISAba45	IS3	IS150	Acinetobacter baumannii	36.2	2.2
	ISStin7	IS3	IS150	Streptococcus iniae	36.2	2.2
	ISArma1	IS607		Arthrospira maxima	36.2	2.2
	ISSep1	IS1182		Staphylococcus epidermidis	36.2	2.2
	ISAzo33	IS630		Azoarcus sp.	36.2	2.2
	ISMac25	IS1	ISMhu11	Methanosarcina acetivorans	36.2	2.2
	ISSpn4	IS3	IS150	Streptococcus pneumoniae	36.2	2.2
	ISXau1	IS3	IS407	Xanthobacter autotrophicus	36.2	2.2
	ISLca4	ISLre2		Lactobacillus casei	36.2	2.2
	ISBce11	IS4	IS231	Bacillus cereus	36.2	2.2
	ISMbov8	IS1634		Mycoplasma bovis	34.2	8.9
	ISHsal11	IS630		Halobacterium salinarum	34.2	8.9
	ISHsal10	IS630		Halobacterium salinarum	34.2	8.9
	ISHsal9	IS630		Halobacterium salinarum	34.2	8.9
	ISBmu21	IS6		Burkholderia multivorans	34.2	8.9
	ISPye46	IS110	IS1111	Paracoccus yeei	34.2	8.9
	ISPye42	IS3	IS51	Paracoccus yeei	34.2	8.9
	ISCsp3	IS21		Comamonas sp.	34.2	8.9
	ISNpe13	IS630		Natrinema pellirubrum	34.2	8.9
	ISMfu2	ISKra4	ISKra4	Myxococcus fulvus	34.2	8.9
	ISHvo16	IS630		Haloferax volcanii	34.2	8.9
	ISCbe6	IS256		Caldicellulosiruptor bescii	34.2	8.9
	ISAzs17	Tn3		Azospirillum sp.	34.2	8.9
	ISNha8	IS5		Nitrobacter hamburgensis	34.2	8.9
	ISNisp7	IS5		Nitrobacter sp.	34.2	8.9
	ISRpa9	IS5	IS5	Rhodopseudomonas palustris	34.2	8.9
	ISDal2	IS5	IS5	Desulfatibacillum alkenivorans	34.2	8.9
	ISGlo4	IS5	IS5	Geobacter lovleyi	34.2	8.9
	ISFsp15	IS1380		Frankia sp.	34.2	8.9
	ISMex26	ISL3		Methylobacterium extorquens	34.2	8.9
	ISVsa2	IS66		Aliivibrio salmonicida	34.2	8.9
	ISAli20	Tn3		Azospirillum lipoferum	34.2	8.9
	ISGdi11	IS3	IS407	Gluconacetobacter diazotrophicus	34.2	8.9
	ISHar1	IS3	IS150	Herminiimonas arsenicoxydans	34.2	8.9
	ISPlsp1	IS3	IS150	Polynucleobacter sp.	34.2	8.9
	ISSav1	IS4	IS4	Streptomyces avermitilis	34.2	8.9
	ISMysp2	IS1595	ISSod11	Mycobacterium sp.	34.2	8.9
	ISMfl2	IS1595	ISSod11	Mycobacterium flavescens	34.2	8.9
	ISMva1	IS1595	ISSod11	Mycobacterium vanbaalenii	34.2	8.9
	ISMba10	IS630		Methanosarcina barkeri	34.2	8.9
	ISBcen9	IS3	IS150	Burkholderia cenocepacia	34.2	8.9
	ISNg1	IS3	IS150	Neisseria gonorrhoeae	34.2	8.9
	ISL6	IS3	IS150	Lactobacillus delbrueckii	34.2	8.9
	IS66	IS66		Agrobacterium tumefaciens	34.2	8.9
	IS1474	IS21		Pseudomonas alcaligenes	34.2	8.9
Contig 40	IS200C	IS200/IS605	IS200	Escherichia coli	135	3e-30
	ISEch5	IS200/IS605	IS200	Dickeya dadantii	133	1e-29
	IS200G	IS200/IS605	IS200	Yersinia pestis	133	1e-29
	IS1541D	IS200/IS605	IS200	Yersinia enterocolitica	133	1e-29
	IS1541B	IS200/IS605	IS200	Yersinia pseudotuberculosis	133	1e-29
	IS1541A	IS200/IS605	IS200	Yersinia pseudotuberculosis	133	1e-29
	IS200F	IS200/IS605	IS200	Salmonella typhimurium	125	3e-27
	IS1541C	IS200/IS605	IS200	Yersinia enterocolitica	125	3e-27
	IS200	IS200/IS605	IS200	Salmonella typhimurium	109	2e-22
	IS200H	IS200/IS605	IS200	Salmonella abortusovis	101	4e-20
	MITEEc1	IS630		Escherichia coli	48.1	0.0006
	ISCARN10	IS200/IS605	IS200	Metagenomic data	44.1	0.009
	ISMmg1	IS110	IS1111	Magnetospirillum magnetotacticum	38.2	0.54
	ISPph5	ISNCY	ISDol1	Pelodictyon phaeoclathratiforme	36.2	2.1
	ISSfu1	IS1380		Syntrophobacter fumaroxidans	36.2	2.1
	ISMdi20	IS630		Methylobacterium dichloromethanicum	36.2	2.1
	ISOan1	ISAs1		Octadecabacter antarcticus	36.2	2.1
	ISThsp18	IS1182		Thiomonas sp.	36.2	2.1
	ISArsp14	ISNCY		Arthrobacter sp.	34.2	8.4
	ISMbov8	IS1634		Mycoplasma bovis	34.2	8.4
	ISEc59	IS6		Escherichia coli	34.2	8.4
	TnDra1	Tn3		Deinococcus radiodurans	34.2	8.4
	ISPye25	IS110	IS1111	Paracoccus yeei	34.2	8.4
	ISPto10	IS1595	ISSod11	Psychroflexus torquis	34.2	8.4
	ISAeme19	ISL3		Aeromonas media	34.2	8.4
	ISLesp2	ISKra4	ISKra4	Leptolyngbya sp.	34.2	8.4
	ISH31	ISH6		Halobacterium sp.	34.2	8.4
	ISDce1	IS5		Desulfotomaculum acetoxidans	34.2	8.4
	ISXoo14	IS5		Xanthomonas oryzae	34.2	8.4
	ISMno10	IS1182		Methylobacterium nodulans	34.2	8.4
	ISCARN104	IS66		Metagenomic data	34.2	8.4
	ISKol1	IS21		Kosmotoga olearia	34.2	8.4
	ISMrsp6	IS1380		Marinobacter sp.	34.2	8.4
	ISMex35	IS5	IS5	Methylobacterium extorquens	34.2	8.4
	ISMdi4	IS481		Methylobacterium dichloromethanicum	34.2	8.4
	ISAzo40	IS1380		Azoarcus sp.	34.2	8.4
	ISCARN88	IS1182		Metagenomic data	34.2	8.4
	ISCARN20	IS110		Metagenomic data	34.2	8.4
	ISYps3	Tn3		Yersinia pseudotuberculosis	34.2	8.4
	ISTps1	IS6		Thermoanaerobacter pseudethanolicus	34.2	8.4
	ISTsp1	IS6		Thermoanaerobacter sp.	34.2	8.4
	ISVsa9	IS91		Aliivibrio salmonicida	34.2	8.4
	ISDsp1	IS3	IS407	Dehalococcoides sp.	34.2	8.4
	ISFal1	ISL3		Frankia alni	34.2	8.4
	ISSac1	IS630		Syntrophus aciditrophicus	34.2	8.4
	ISMbov3	IS1634		Mycoplasma bovis	34.2	8.4
	ISGsu3	IS5		Geobacter sulfurreducens	34.2	8.4
	ISBlo11	IS3	IS150	Bifidobacterium longum	34.2	8.4
	ISHla10	ISH6		Halorubrum lacusprofundi	34.2	8.4
	ISPa42	Tn3		Pseudomonas aeruginosa	34.2	8.4
	IS866	IS66		Agrobacterium tumefaciens	34.2	8.4
	IS1634	IS1634		Mycoplasma mycoides	34.2	8.4
	IS1395	IS256		Mycobacterium xenopi	34.2	8.4
Contig 41	ISAbe8	IS30		Acinetobacter bereziniae	44.1	0.008
	ISElsp1	IS3	IS3	Elizabethkingia sp.	40.1	0.12
	ISCfe1	IS607		Campylobacter fetus	40.1	0.12
	ISSc1	IS30		Spiroplasma citri	40.1	0.12
	ISAbe14	ISL3		Acinetobacter bereziniae	38.2	0.47
	TnBth3	Tn3		Bacillus thuringiensis	36.2	1.9
	ISBaba6	IS1595		Bacteroidetes bacterium	36.2	1.9
	ISCig1	IS1595	ISPna2	Campylobacter iguaniorum	36.2	1.9
	ISMags1	ISNCY	ISDol1	Candidatus Magnetomorum	36.2	1.9
	ISDssp3	ISAzo13		Desulfobacterium sp.	36.2	1.9
	ISAsp10	IS4	IS10	Anabaena sp.	36.2	1.9
	ISMae37	ISL3		Microcystis aeruginosa	36.2	1.9
	ISAba125	IS30		Acinetobacter baumannii	36.2	1.9
	ISS1W	IS6		Lactococcus lactis	36.2	1.9
	IS1675	IS4	IS4	Lactococcus lactis	36.2	1.9
	IS1216V	IS6		Enterococcus sp.	36.2	1.9
	IS1216E	IS6		Enterococcus faecium	36.2	1.9
	IS1216	IS6		Enterococcus hirae	36.2	1.9
	ISTeha5	IS4	IS4Sa	Tetragenococcus halophilus	34.2	7.4
	ISLbp2	IS256		Leptospira borgpetersenii	34.2	7.4
	ISWci2	IS3	IS3	Weissella cibaria	34.2	7.4
	ISAba45	IS3	IS150	Acinetobacter baumannii	34.2	7.4
	ISEcret7	IS5	IS5	Endozoicomonas endosymbiont	34.2	7.4
	ISVfl1	IS1595	IS1595	Vibrio fluvialis	34.2	7.4
	ISHp1	IS1595	ISPna2	Helicobacter pylori	34.2	7.4
	ISAba37	IS5	IS1031	Acinetobacter baumannii	34.2	7.4
	ISBrsa1	IS3	IS3	Brenneria salicis	34.2	7.4
	ISHaha9	IS200/IS605	IS1341	Halobacillus halophilus	34.2	7.4
	ISEc52	IS3	IS3	Escherichia coli	34.2	7.4
	ISDpr10	ISKra4	ISKra4	Delta proteobacterium	34.2	7.4
	ISCla2	ISLre2		Caldicellulosiruptor lactoaceticus	34.2	7.4
	ISCps8	IS110	IS1111	Colwellia psychrerythraea	34.2	7.4
	ISWpi16	IS982		Wolbachia pipientis	34.2	7.4
	ISCaa16	IS6		Candidatus Amoebophilus	34.2	7.4
	ISCysp17	IS5	IS5	Cyanothece sp.	34.2	7.4
	ISCysp16	IS5	IS5	Cyanothece sp.	34.2	7.4
	ISBf4	IS1182		Bacteroides fragilis	34.2	7.4
	ISSau3	IS1182		Staphylococcus aureus	34.2	7.4
	ISFnu1	IS1182		Fusobacterium nucleatum	34.2	7.4
	ISCARN110	IS91		Metagenomic data	34.2	7.4
	ISCARN96	IS1182		Metagenomic data	34.2	7.4
	ISBun2	IS1595	ISNwi1	Bacteroides uniformis	34.2	7.4
	ISCba1	IS1595	ISPna2	Clostridium bartlettii	34.2	7.4
	ISApl1	IS30		Actinobacillus pleuropneumoniae	34.2	7.4
	ISNpu4	IS4	IS10	Nostoc punctiforme	34.2	7.4
	ISDpr2	IS4	ISPepr1	delta proteobacterium	34.2	7.4
	ISMma16	IS256		Methanosarcina mazei	34.2	7.4
	ISMst1	ISNCY	ISM1	Methanosphaera stadtmanae	34.2	7.4
	ISC1395	IS630		Sulfolobus solfataricus	34.2	7.4
	ISMac8	IS66	ISBst12	Methanosarcina acetivorans	34.2	7.4
	ISLga1	IS30		Lactobacillus gasseri	34.2	7.4
	ISPsa1	IS982		Piscirickettsia salmonis	34.2	7.4
	ISFtu1	IS630		Francisella tularensis	34.2	7.4
	ISC1041	IS30		Sulfolobus solfataricus	34.2	7.4
	IS911	IS3	IS3	Shigella dysenteriae	34.2	7.4
	IS1396	ISL3		Serratia marcescens	34.2	7.4
	IS1296	IS3	IS150	Mycoplasma mycoides	34.2	7.4
	IS1170	IS1380	IS942	Bacteroides thetaiotaomicron	34.2	7.4
Contig 42	ISCg2	IS30		Corynebacterium glutamicum	38.2	0.35
	ISBcen27	ISNCY	IS1202	Burkholderia cenocepacia	36.2	1.4
	ISPsy42	Tn3		Pseudomonas syringae	36.2	1.4
	ISRso22	IS1595	ISPna2	Ralstonia solanacearum	36.2	1.4
	ISDssp5	ISNCY	ISDol1	Desulfobacterium sp.	36.2	1.4
	TnShfr1	Tn3		Shewanella frigidimarina	36.2	1.4
	ISAba17	IS66		Acinetobacter baumannii	36.2	1.4
	ISGdi12	IS701		Gluconacetobacter diazotrophicus	36.2	1.4
	ISSav4	IS701		Streptomyces avermitilis	36.2	1.4
	ISAtu2	IS5	IS5	Agrobacterium tumefaciens	36.2	1.4
	ISPa85	IS21		Pseudomonas aeruginosa	34.2	5.5
	ISPpu23	IS21		Pseudomonas putida	34.2	5.5
	TnAs1	Tn3		Aeromonas salmonicida	34.2	5.5
	TnAs2	Tn3		Aeromonas salmonicida	34.2	5.5
	ISHvo23	IS200/IS605	IS1341	Haloferax volcanii	34.2	5.5
	ISAzs21	IS66		Azospirillum sp.	34.2	5.5
	ISMgi2	IS1182		Mycobacterium gilvum	34.2	5.5
	ISCysp17	IS5	IS5	Cyanothece sp.	34.2	5.5
	ISMav8	IS1380		Mycobacterium avium	34.2	5.5
	ISRgn3	IS1380		Ruminococcus gnavus	34.2	5.5
	ISCth7	IS110		Clostridium thermocellum	34.2	5.5
	ISSde4	IS110	IS1111	Shewanella denitrificans	34.2	5.5
	ISAtu4	IS3	IS51	Agrobacterium tumefaciens	34.2	5.5
	ISMja1	IS6		Methanocaldococcus jannaschii	34.2	5.5
	ISEc10	IS21		Escherichia coli	34.2	5.5
Contig 43	ISEc5	ISAs1		Escherichia coli	61.9	2e-08
	ISEc1	ISAs1		Escherichia coli	61.9	2e-08
	IS621	IS110		Escherichia coli	60.0	9e-08
	ISAeme14	IS4	IS4	Aeromonas media	40.1	0.084
	ISHahy5	IS3		Halanaerobium hydrogeniformans	38.2	0.33
	ISNamo21	IS200/IS605	IS1341	Natronomonas moolapensis	38.2	0.33
	ISCco1	IS200/IS605	IS605	Campylobacter coli	38.2	0.33
	ISBlma1	IS4	IS4Sa	Blastopirellula marina	38.2	0.33
	ISGob7	ISKra4	ISKra4	Gemmata obscuriglobus	36.2	1.3
	ISCsa1	ISL3		Caldicellulosiruptor saccharolyticus	36.2	1.3
	ISMpo10	Tn3		Methylobacterium populi	36.2	1.3
	ISCARN102	IS630		Metagenomic data	36.2	1.3
	ISBrsp6	IS66		Bradyrhizobium sp.	36.2	1.3
	ISBce8	IS4	IS231	Bacillus cereus	36.2	1.3
	ISMma9	IS630		Methanosarcina mazei	36.2	1.3
	ISArch4	IS630		Uncultured archaeon	36.2	1.3
	ISCco7	IS607		Campylobacter coli	34.2	5.2
	ISFba4	IS1595	ISSod11	Flavobacteria bacterium	34.2	5.2
	ISGal1	IS1595	ISSod11	Gelidibacter algens	34.2	5.2
	ISPmo1	IS1182		Pseudomonas monteilii	34.2	5.2
	ISNamo5	IS701		Natronomonas moolapensis	34.2	5.2
	ISCysp17	IS5	IS5	Cyanothece sp.	34.2	5.2
	ISHmo1	IS1380		Heliobacterium modesticaldum	34.2	5.2
	ISSep1	IS1182		Staphylococcus epidermidis	34.2	5.2
	ISCysp8	ISAs1		Cyanothece sp.	34.2	5.2
	ISAzo11	IS5	IS5	Azoarcus sp.	34.2	5.2
	ISCbe3	IS21		Caldicellulosiruptor bescii	34.2	5.2
	ISBcen15	IS3	IS407	Burkholderia cenocepacia	34.2	5.2
	IS1272	IS1182		Staphylococcus haemolyticus	34.2	5.2
Contig 44	IS200C	IS200/IS605	IS200	Escherichia coli	123	6e-27
	IS200F	IS200/IS605	IS200	Salmonella typhimurium	105	2e-21
	IS1541D	IS200/IS605	IS200	Yersinia enterocolitica	103	6e-21
	IS200	IS200/IS605	IS200	Salmonella typhimurium	101	2e-20
	IS1541C	IS200/IS605	IS200	Yersinia enterocolitica	91.7	2e-17
	IS200H	IS200/IS605	IS200	Salmonella abortusovis	89.7	9e-17
	IS200G	IS200/IS605	IS200	Yersinia pestis	87.7	4e-16
	IS1541A	IS200/IS605	IS200	Yersinia pseudotuberculosis	87.7	4e-16
	IS1541B	IS200/IS605	IS200	Yersinia pseudotuberculosis	85.7	1e-15
	ISEch5	IS200/IS605	IS200	Dickeya dadantii	77.8	3e-13
	IS682	IS66		Escherichia coli	38.2	0.29
	ISFsp3	IS21		Frankia sp.	38.2	0.29
	ISDar1	IS110	IS1111	Dechloromonas aromatica	36.2	1.2
	TnAs2	Tn3		Aeromonas salmonicida	36.2	1.2
	ISVha2	IS1182		Vibrio harveyi	36.2	1.2
	ISPar1	IS3	IS3	Psychrobacter arcticus	36.2	1.2
	ISArsp16	ISNCY		Arthrobacter sp.	34.2	4.6
	TnDra1	Tn3		Deinococcus radiodurans	34.2	4.6
	ISRor2	ISNCY	ISPlu15	Raoultella ornithinolytica	34.2	4.6
	ISCal1	IS1595	ISSod11	Cellulophaga algicola	34.2	4.6
	ISLgar2	IS982		Lactococcus garvieae	34.2	4.6
	ISPa38	Tn3		Pseudomonas aeruginosa	34.2	4.6
	ISCysp18	IS5	IS5	Cyanothece sp.	34.2	4.6
	ISMsm10	IS1380		Mycobacterium smegmatis	34.2	4.6
	ISVsa19	Tn3		Aliivibrio salmonicida	34.2	4.6
	ISAcma21	IS1380		Acaryochloris marina	34.2	4.6
	ISVme1	IS66		Vibrio metschnikovii	34.2	4.6
	ISMac5	IS1634		Methanosarcina acetivorans	34.2	4.6
	ISMag1	IS30		Mycoplasma agalactiae	34.2	4.6
	ISSeq2	ISNCY	IS1202	Streptococcus equi	34.2	4.6
Contig 45	ISGur10	IS3	IS3	Geobacter uraniumreducens	38.2	0.23
	ISEc51	ISKra4	ISAzba1	Escherichia sp.	36.2	0.92
	ISMba8	IS701		Methanosarcina barkeri	36.2	0.92
	ISLisp1	IS21		Limnohabitans sp.	34.2	3.6
	ISBba1	IS1595	ISSod11	Burkholderiaceae bacterium	34.2	3.6
	ISAeme21	IS481		Aeromonas media	34.2	3.6
	ISLgar2	IS982		Lactococcus garvieae	34.2	3.6
	ISMae29	IS630		Microcystis aeruginosa	34.2	3.6
[truncated: 297 more rows]

## Sheet: IS K12 NEB DH5alpha
Contig	Sequences producing	IS Family	Group	Origin	Score	E. value
	significant alignments				(bits)
Contig 1	ISEc63	Tn3		Escherichia coli	6096	0.0
	IS609	IS200/IS605	IS605	Escherichia coli	3140	0.0
	IS150	IS3	IS150	Escherichia coli	2837	0.0
	IS4	IS4	IS4	Escherichia coli	2827	0.0
	IS103	IS3	IS150	Escherichia coli	2823	0.0
	IS2	IS3	IS2	Escherichia coli	2639	0.0
	IS186B	IS4	IS231	Escherichia coli	2639	0.0
	ISVsa5	IS4	IS10	Aliivibrio salmonicida	2635	0.0
	IS10R	IS4	IS10	Salmonella typhimurium	2635	0.0
	IS421	IS4	IS231	Escherichia coli	2633	0.0
	IS186A	IS4	IS231	Escherichia coli	2607	0.0
	ISEc5	ISAs1		Escherichia coli	2559	0.0
	ISEc1	ISAs1		Escherichia coli	2559	0.0
	IS10L	IS4	IS10	Salmonella typhimurium	2555	0.0
	IS3	IS3	IS3	Escherichia coli	2494	0.0
	ISEc17	IS3	IS3	Escherichia coli	2470	0.0
	IS30D	IS30		Escherichia coli	2420	0.0
	IS30	IS30		Escherichia coli	2420	0.0
	IS5	IS5	IS5	Escherichia coli	2369	0.0
	ISKpn26	IS5	IS5	Klebsiella pneumoniae	2331	0.0
	IS5B	IS5	IS5	Escherichia coli	2282	0.0
	ISKpn8	IS3	IS150	Klebsiella pneumoniae	2258	0.0
	ISEc26	ISAs1		Escherichia coli	2238	0.0
	IS5D	IS5	IS5	Escherichia coli	2087	0.0
	IS3F	IS3	IS3	Escherichia fergusonii	2050	0.0
	IS3H	IS3	IS3	Shigella dysenteriae	1790	0.0
	IS1F	IS1		Escherichia coli	1522	0.0
	IS1D	IS1		Escherichia coli	1522	0.0
	IS1A	IS1		Escherichia coli	1522	0.0
	IS1G	IS1		Escherichia coli	1515	0.0
	IS1S	IS1		Shigella sonnei	1491	0.0
	IS1R	IS1		Escherichia coli	1491	0.0
	IS1B	IS1		Escherichia coli	1491	0.0
	IS1SD	IS1		Shigella dysenteriae	1447	0.0
	IS30H	IS30		Escherichia hermannii	1429	0.0
	IS1X1	IS1		Shigella flexneri	1411	0.0
	ISEc52	IS3	IS3	Escherichia coli	1398	0.0
	IS911	IS3	IS3	Shigella dysenteriae	1302	0.0
	IS1X2	IS1		Escherichia vulneris	1285	0.0
	ISSen9	IS1		Salmonella enterica	1189	0.0
	IS1X4	IS1		Escherichia hermannii	1150	0.0
	ISLad1	IS3	IS3	Leclercia adecarboxylata	1015	0.0
	IS1X3	IS1		Escherichia fergusonii	983	0.0
	ISEc27	IS3	IS2	Escherichia coli	946	0.0
	ISKpn14	IS1		Klebsiella pneumoniae	777	0.0
	ISEsa1	ISNCY	IS1202	Enterobacter sakazakii	749	0.0
	ISEc44	IS200/IS605	IS605	Escherichia coli	747	0.0
	ISPcc3	IS4	IS4	Pectobacterium carotovorum	632	1e-177
	ISSfl10	IS3	IS3	Shigella flexneri	632	1e-177
	IS600	IS3	IS3	Shigella sonnei	632	1e-177
	ISSd1	IS3	IS3	Shigella dysenteriae	617	7e-173
	ISEc16	IS3	IS3	Escherichia coli	549	1e-152
	ISPrre1	IS3	IS3	Providencia rettgeri	494	7e-136
	ISEal1	IS3	IS3	Escherichia albertii	488	4e-134
	ISBrsa1	IS3	IS3	Brenneria salicis	466	2e-127
	ISErsp1	IS481		Erwinia sp.	466	2e-127
	ISSfl11	IS3	IS3	Shigella flexneri	466	2e-127
	ISEc36	IS3	IS2	Escherichia coli	446	1e-121
	ISSen6	IS200/IS605	IS605	Salmonella enterica	440	9e-120
	ISSty2	IS3	IS3	Salmonella typhimurium	402	2e-108
	IS1230B	IS3	IS3	Salmonella enteritidis	355	4e-94
	ISEc68	IS5	IS5	Escherichia coli	325	4e-85
	ISEc47	IS66		Escherichia coli	299	2e-77
	Tn3	Tn3		Salmonella enterica	295	3e-76
	Tn2	Tn3		Escherichia coli	287	8e-74
	ISEc23	IS66		Escherichia coli	276	3e-70
	IS682	IS66		Escherichia coli	260	2e-65
	ISEc49	IS66		Escherichia coli	254	1e-63
	ISPeat2	IS3	IS3	Pectobacterium atrosepticum	250	2e-62
	MITEEc1	IS630		Escherichia coli	244	1e-60
	ISEc43	IS66		Escherichia coli	244	1e-60
	ISAs26	IS200/IS605	IS605	Aeromonas salmonicida	238	7e-59
	ISSba14	Tn3		Shewanella baltica	222	4e-54
	ISEc13	IS4	IS50	Escherichia coli	222	4e-54
	IS621	IS110		Escherichia coli	200	1e-47
	ISVch5	IS5	IS5	Vibrio cholerae	192	3e-45
	ISAhy3	IS30		Aeromonas hydrophila	190	1e-44
	ISSod13	IS481		Shewanella oneidensis	186	2e-43
	ISEc41	IS200/IS605	IS605	Escherichia coli	172	3e-39
	ISAs10	IS30		Aeromonas salmonicida	167	2e-37
	ISKpn41	IS200/IS605	IS1341	Klebsiella pneumoniae	163	3e-36
	IS1414	IS256		Escherichia coli	139	4e-29
	ISKpn47	IS256		Klebsiella pneumoniae	133	3e-27
	ISEic2	IS256		Edwardsiella ictaluri	123	3e-24
	ISSpu18	IS481		Shewanella putrefaciens	117	2e-22
	IS1397	IS3	IS150	Escherichia coli	113	3e-21
	ISShes15	IS481		Shewanella sp.	111	1e-20
	ISPcc4	IS1182		Pectbacterium carotovorum	109	4e-20
	ISKox1	IS66		Klebsiella oxytoca	109	4e-20
	ISSoEn2	IS256		Primary endosymbiont	103	2e-18
	ISPa9	IS5	IS5	Pseudomonas aeruginosa	103	2e-18
	ISKpn33	IS66		Klebsiella pneumoniae	97.6	2e-16
	ISPsy46	IS5	IS5	Pseudomonas syringae	95.6	6e-16
	ISPsp6	IS5	IS5	Pseudomonas sp.	95.6	6e-16
	IS52	IS5	IS5	Pseudomonas syringae	95.6	6e-16
	ISEsp1	IS66		Enterobacter sp.	93.7	2e-15
	ISPcc6	IS4	IS4	Pectobacterium carotovorum	93.7	2e-15
	ISVch9	IS5	IS5	Vibrio cholerae	91.7	9e-15
	IS1406	IS5		Pseudomonas sp.	87.7	1e-13
	MITEYpe1	IS630		Yersinia pestis	85.7	6e-13
	ISCfr6	IS3	IS3	Citrobacter freundii	85.7	6e-13
	ISBcen6	IS3	IS2	Burkholderia cenocepacia	85.7	6e-13
	ISPa106	IS5	IS5	Pseudomonas aeruginosa	83.8	2e-12
	ISAs17	IS3	IS2	Aeromonas salmonicida	83.8	2e-12
	ISButh2	IS3	IS2	Burkholderia thailandensis	83.8	2e-12
	ISDlsp1	IS5	IS5	Delftia sp.	81.8	9e-12
	ISRso18	IS5	IS5	Ralstonia solanacearum	81.8	9e-12
	IS1021	IS5	IS5	Ralstonia solanacearum	81.8	9e-12
	ISPa54	IS5	IS5	Pseudomonas aeruginosa	79.8	4e-11
	ISVvu4	IS481		Vibrio vulnificus	77.8	1e-10
	ISYkr1	IS30		Yersinia kristensenii	75.8	6e-10
	ISEc31	IS3	IS3	Escherichia coli	75.8	6e-10
	ISAs6	IS3	IS3	Aeromonas salmonicida	73.8	2e-09
	ISEc39	IS256		Escherichia coli	73.8	2e-09
	ISSlo2	IS3	IS3	Shewanella loihica	73.8	2e-09
	ISXfu2	IS5	IS5	Xanthomonas fuscans	73.8	2e-09
	TnEc4	Tn3		Escherichia coli	71.9	9e-09
	ISShfr6	IS3	IS3	Shewanella frigidimarina	71.9	9e-09
	ISSde2	IS481		Shewanella denitrificans	71.9	9e-09
	ISAs3	IS256		Aeromonas salmonicida	71.9	9e-09
	ISPa42	Tn3		Pseudomonas aeruginosa	71.9	9e-09
	ISEcl6	IS66		Enterobacter cloacae	69.9	3e-08
	ISAve4	IS3	IS3	Aeromonas veronii	69.9	3e-08
	ISEc48	IS3	IS2	Escherichia coli	69.9	3e-08
	IS285	IS256		Yersinia pestis	69.9	3e-08
	ISPa96	IS5	IS5	Pseudomonas aeruginosa	67.9	1e-07
	ISEae2	IS3	IS2	Enterobacter aerogenes	67.9	1e-07
	ISSba5	IS3	IS3	Shewanella baltica	67.9	1e-07
	ISMca7	IS5	IS5	Methylococcus capsulatus	67.9	1e-07
	ISPa20	IS3	IS3	Pseudomonas aeruginosa	67.9	1e-07
	IS1646	IS5	IS5	Xanthomonas campestris	67.9	1e-07
	ISEcl5	IS5	IS5	Enterobacter cloacae	65.9	5e-07
	ISAs33	IS3	IS3	Aeromonas salmonicida	65.9	5e-07
	ISBmu20	IS5	IS5	Burkholderia multivorans	65.9	5e-07
	ISPpu21	IS5	IS5	Pseudomonas putida	65.9	5e-07
	ISCARN107	IS5	IS5	Metagenomic data	65.9	5e-07
	IS1479	IS5	IS5	Xanthomonas campestris	65.9	5e-07
	ISPmo2	IS5	IS5	Pseudomonas monteilii	63.9	2e-06
	ISPa41	IS5	IS5	Pseudomonas aeruginosa	63.9	2e-06
	ISPre1	IS5	IS5	Pseudomonas resinovorans	63.9	2e-06
	ISBmu2	IS5	IS5	Burkholderia multivorans	63.9	2e-06
	ISXo1	IS5	IS5	Xanthomonas oryzae	63.9	2e-06
	ISSe1	ISAs1		Salmonella enterica	63.9	2e-06
	ISPa52	IS5	IS5	Pseudomonas aeruginosa	61.9	8e-06
	ISCro3	IS4		Citrobacter rodentium	61.9	8e-06
	ISPa26	IS5	IS5	Pseudomonas aeruginosa	61.9	8e-06
	ISEcl1	IS3	IS2	Enterobacter cloacae	61.9	8e-06
	ISCfr25	IS3	IS3	Citrobacter freundii	60.0	3e-05
	MITEPlu5	IS630		Photorhabdus luminescens	60.0	3e-05
	ISAzs17	Tn3		Azospirillum sp.	60.0	3e-05
	ISVsa11	IS3	IS3	Aliivibrio salmonicida	60.0	3e-05
	ISPa10	IS5	IS5	Pseudomonas aeruginosa	60.0	3e-05
	ISPsp3	IS5	IS5	Pseudomonas sp.	60.0	3e-05
	IS1271	IS4	IS4	Enterobacter agglomerans	60.0	3e-05
	ISSpu4	IS3	IS3	Shewanella putrefaciens	58.0	0.0001
	ISAzvi9	IS3	IS3	Azotobacter vinelandii	58.0	0.0001
	ISRso10	IS3	IS2	Ralstonia solanacearum	58.0	0.0001
	ISPssy	IS5	IS5	Pseudomonas syringae	58.0	0.0001
	IS1405	IS5	IS5	Ralstonia solanacearum	58.0	0.0001
	ISThi1	IS5	IS5	Thioalkalivibrio sp.	56.0	0.0005
	ISYps3	Tn3		Yersinia pseudotuberculosis	56.0	0.0005
	ISPa16	IS5	IS5	Pseudomonas aeruginosa	56.0	0.0005
	ISPre2	IS5	IS5	Pseudomonas resinovorans	56.0	0.0005
	ISPpr10	ISAs1		Photobacterium profundum	56.0	0.0005
	ISPpu18	IS5	IS5	Pseudomonas putida	56.0	0.0005
	ISPsp1	IS5	IS5	Pseudomonas sp.	56.0	0.0005
	IS1384	IS5	IS5	Pseudomonas putida	56.0	0.0005
	ISLead3	IS1		Leclercia adcarboxglata	54.0	0.002
	ISEch6	IS4	IS4	Dickeya dadantii	54.0	0.002
	ISAeme14	IS4	IS4	Aeromonas media	54.0	0.002
	ISAeme13	IS4	IS4	Aeromonas media	54.0	0.002
	ISAeme12	IS4	IS4	Aeromonas media	54.0	0.002
	ISPa56	IS3	IS2	Pseudomonas aeruginosa	54.0	0.002
	ISAs30	IS4	IS4	Aeromonas salmonicida	54.0	0.002
	ISPa43	Tn3		Pseudomonas aeruginosa	54.0	0.002
	ISAch1	IS5	IS5	Achromobacter sp.	54.0	0.002
	ISCARN76	IS5	IS5	Metagenomic data	54.0	0.002
	ISPsy2	IS5	IS5	Pseudomonas syringae	54.0	0.002
	IS1312	IS3	IS2	Agrobacterium tumefaciens	54.0	0.002
	IS1051	IS5	IS5	Xanthomonas campestris	54.0	0.002
	ISPa95	IS5	IS5	Pseudomonas aeruginosa	52.0	0.008
	ISAba30	IS200/IS605	IS605	Acinetobacter baumannii	52.0	0.008
	ISVsp14	IS4	IS231	Verrucomicrobium spinosum	52.0	0.008
	ISBf9	ISAs1		Bacteroides fragilis	52.0	0.008
	ISKpn13	IS5	IS5	Klebsiella pneumoniae	52.0	0.008
	ISSba6	IS4	IS4	Shewanella baltica	52.0	0.008
	ISEcret7	IS5	IS5	Endozoicomonas endosymbiont	50.1	0.032
	ISSpl1	IS3	IS150	Streptococcus pluranimilium	50.1	0.032
	ISAve3	IS3	IS2	Aeromonas veronii	50.1	0.032
	ISCARN66	IS5	IS5	Metagenomic data	50.1	0.032
	ISAzo27	IS5	IS5	Azoarcus sp.	50.1	0.032
	ISPsy24	IS3	IS3	Pseudomonas syringae	50.1	0.032
	ISShes5	IS4	IS10	Shewanella sp.	50.1	0.032
	ISAcma2	ISAs1		Acaryochloris marina	50.1	0.032
	ISFnu8	IS3	IS150	Fusobacterium nucleatum	50.1	0.032
	ISEam1	IS3	IS51	Erwinia amylovora	50.1	0.032
	ISSod7	IS4	IS4	Shewanella oneidensis	50.1	0.032
	ISFnu6	IS3	IS150	Fusobacterium nucleatum	50.1	0.032
	IS2000	IS5	IS5	Pseudomonas aeruginosa	50.1	0.032
	ISRor2	ISNCY	ISPlu15	Raoultella ornithinolytica	48.1	0.13
	ISPsfu1	IS5	IS5	Pseudomonas fulva	48.1	0.13
	ISSlu1	IS30		Streptococcus lutetiensis	48.1	0.13
	ISHaha3	IS3	IS150	Halobacillus halophilus	48.1	0.13
	ISEc38	ISL3		Escherichia coli	48.1	0.13
	ISBmu23	IS5	IS5	Burkholderia multivorans	48.1	0.13
	ISXoo7	IS5	IS5	Xanthomonas oryzae	48.1	0.13
	ISKpn7	IS21		Klebsiella pneumoniae	48.1	0.13
	ISVch4	IS3	IS3	Vibrio cholerae	48.1	0.13
	ISNisp2	IS1595	ISNwi1	Nitrobacter sp.	48.1	0.13
	ISEc14	IS3	IS51	Escherichia coli	48.1	0.13
	ISNieu2	IS3	IS3	Nitrosomonas eutropha	48.1	0.13
	IS1417	IS3	IS2	Burkholderia glumae	48.1	0.13
	IS10A	IS4	IS10	Pseudomonas aeruginosa	48.1	0.13
	ISPlge3	IS3	IS150	Pluralibacter gergoviae	46.1	0.50
	ISEch2	IS3	IS150	Dickeya dadantii	46.1	0.50
	ISPye13	IS3	IS3	Paracoccus yeei	46.1	0.50
	ISBli23	IS481		Brevibacterium linens	46.1	0.50
	ISVa12	IS66		Vibrio anguillarum	46.1	0.50
	ISVa9	IS66		Vibrio anguillarum	46.1	0.50
	TnShfr1	Tn3		Shewanella frigidimarina	46.1	0.50
	ISAau3	IS5	IS5	Arthrobacter aurescens	46.1	0.50
	ISDac1	IS3	IS3	Desulfuromonas acetoxidans	46.1	0.50
	ISPst7	IS5	IS5	Pseudomonas stutzeri	46.1	0.50
	ISRme12	IS3	IS150	Ralstonia metallidurans	46.1	0.50
	ISPst5	IS5	IS5	Pseudomonas stutzeri	46.1	0.50
	ISXfu1	IS5	IS5	Xanthomonas fuscans	46.1	0.50
	ISRor5	IS5	IS5	Raoultella ornithinolytica	44.1	2.0
	ISAlw10	IS4	IS4	Acinetobacter lwoffii	44.1	2.0
	ISAlw9	IS4	IS4	Acinetobacter lwoffii	44.1	2.0
	ISRor3	ISNCY	ISPlu15	Raoultella ornithinolytica	44.1	2.0
	ISHahy15	IS1182		Halanaerobium hydrogeniformans	44.1	2.0
	ISEcret8	IS481		Endozoicomonas endosymbiont	44.1	2.0
	ISPsy45	IS5	IS5	Pseudomonas syringae	44.1	2.0
	Tn4430	Tn3		Bacillus thuringiensis	44.1	2.0
	ISAba42	IS256		Acinetobacter baumannii	44.1	2.0
	ISAeme15	IS4	IS4	Aeromonas media	44.1	2.0
	ISKpn31	ISAs1		Klebsiella pneumoniae	44.1	2.0
	ISCps6	IS1182		Colwellia psychrerythraea	44.1	2.0
	IS1087B	IS3	IS2	Ralstonia metallidurans	44.1	2.0
	ISAlg	IS3	IS3	Vibrio cholerae	44.1	2.0
	ISHar7	IS3	IS51	Herminiimonas arsenicoxydans	44.1	2.0
	ISHar5	IS30		Herminiimonas arsenicoxydans	44.1	2.0
	ISHar4	IS30		Herminiimonas arsenicoxydans	44.1	2.0
	ISPpr11	ISAs1		Photobacterium profundum	44.1	2.0
	ISSod19	IS110	IS1111	Shewanella oneidensis	44.1	2.0
	ISButh1	IS3	IS2	Burkholderia thailandensis	44.1	2.0
	ISAusp1	IS1595	ISNha5	Aurantimonas sp.	44.1	2.0
	ISSpu1	IS3	IS3	Shewanella putrefaciens	44.1	2.0
	ISPsy29	IS3	IS51	Pseudomonas syringae	44.1	2.0
	ISShes1	IS3	IS3	Shewanella sp.	44.1	2.0
	ISBxe2	IS3	IS3	Burkholderia xenovorans	44.1	2.0
	ISPpr1	IS4	IS10	Photobacterium profundum	44.1	2.0
	ISMbu2	ISNCY	ISM1	Methanococcoides burtonii	44.1	2.0
	ISBugl1	IS3	IS2	Burkholderia glumae	44.1	2.0
	IS801	IS91		Pseudomonas syringae	44.1	2.0
	IS1223	IS3	IS150	Lactobacillus johnsonii	44.1	2.0
	IS1087	IS3	IS2	Ralstonia eutropha	44.1	2.0
	ISPa127	IS3	IS3	Pseudomonas aeruginosa	42.1	7.8
	ISPa126	IS3	IS3	Pseudomonas aeruginosa	42.1	7.8
	ISPa94	IS1182		Pseudomonas aeruginosa	42.1	7.8
	ISPa78	IS3	IS51	Pseudomonas aeruginosa	42.1	7.8
	ISMph1	IS1595	ISNha5	Methylobacterium phyllosphaerae	42.1	7.8
	MITEHarch1	IS5	ISH1	Halophilic archaeon	42.1	7.8
	ISPlu22	ISNCY	ISPlu15	Photorhabdus luminescens	42.1	7.8
	ISShsp4	IS1595	ISSod11	Sphingomonas sp.	42.1	7.8
	ISMgr1	IS1595	ISSod11	Magnetospirillum gryphiswaldense	42.1	7.8
	ISPge1	IS1595	IS1595	Pseudomonas geniculata	42.1	7.8
	ISAcmu1	IS1595	IS1595	Acidiphilium multivorum	42.1	7.8
	ISCasa1	IS1595	ISPna2	Caenispirillum salinarum	42.1	7.8
	ISPa60	ISAs1		Pseudomonas aeruginosa	42.1	7.8
	TnAs3	Tn3		Aeromonas salmonicida	42.1	7.8
	ISAeme3	IS4	ISH8	Aeromonas media	42.1	7.8
	ISHaru2	IS200/IS605	IS1341	Halobellus rufus	42.1	7.8
	ISHwa18	IS200/IS605	IS1341	Haloquadratum walsbyi	42.1	7.8
	ISAs25	IS1634		Aeromonas salmonicida	42.1	7.8
	ISIde2	IS21		Ideonella dechloratans	42.1	7.8
	ISKpn21	ISNCY	IS1202	Klebsiella pneumoniae	42.1	7.8
	ISSri1	ISKra4	ISKra4	Streptomyces rimosus	42.1	7.8
	ISEc51	ISKra4	ISAzba1	Escherichia sp.	42.1	7.8
	ISHaha5	IS110		Halobacillus halophilus	42.1	7.8
	ISMth3	IS5	IS903	Methanosaeta thermophila	42.1	7.8
	ISCte6	IS5	IS903	Comamonas testosteroni	42.1	7.8
	ISStma15	IS3	IS51	Stenotrophomonas maltophilia	42.1	7.8
	ISSen3	IS21		Salmonella enterica	42.1	7.8
	ISEc33	IS630		Escherichia coli	42.1	7.8
	ISArsp6	Tn3		Arthrobacter sp.	42.1	7.8
	ISDeac1	IS1380		Delftia acidovorans	42.1	7.8
	ISRme16	IS5		Ralstonia eutropha	42.1	7.8
	ISCARN87	IS630		Metagenomic data	42.1	7.8
	ISCARN82	IS5	IS1031	Metagenomic data	42.1	7.8
	ISSen1	IS3	IS3	Salmonella enterica	42.1	7.8
	ISAli18	ISL3		Azospirillum lipoferum	42.1	7.8
	ISGob3	IS66	ISBst12	Gemmata obscuriglobus	42.1	7.8
	ISHne2	IS481		Hyphomonas neptunium	42.1	7.8
	ISVha1	ISAs1		Vibrio harveyi	42.1	7.8
	ISEc24	IS3	IS51	Escherichia coli	42.1	7.8
	ISSth6	IS3	IS150	Streptococcus thermophilus	42.1	7.8
	ISSmu1	IS3	IS150	Streptococcus mutans	42.1	7.8
	ISSod9	Tn3		Shewanella oneidensis	42.1	7.8
	ISNieu3	IS3	IS3	Nitrosomonas eutropha	42.1	7.8
	ISAma1	IS3	IS3	Alteromonas macleodii	42.1	7.8
	ISAzvi5	IS4	IS10	Azotobacter vinelandii	42.1	7.8
	ISMba6	IS4	ISH8	Methanosarcina barkeri	42.1	7.8
	ISApu1	IS4	ISH8	Aeromonas punctata	42.1	7.8
	ISLhe6	IS3	IS150	Lactobacillus helveticus	42.1	7.8
	ISPlu4	IS1634		Photorhabdus luminescens	42.1	7.8
	ISFtu1	IS630		Francisella tularensis	42.1	7.8
	IS861	IS3	IS150	Streptococcus agalactiae	42.1	7.8
	IS1353	IS3	IS150	Pseudomonas aeruginosa	42.1	7.8

## Sheet: phage ED1
Region Length	Total Proteins	Region Position	Most Common Phage	NCBI Reference Sequence	GC %
15.4Kb	20	40462-ID1351-ED1-S33-C2:1-15468	PHAGE_Shigel_SfII	NC_021857	53.72%
46.2Kb	52	40462-ID1351-ED1-S33-C4:43544-89832	PHAGE_Entero_P88	NC_026014	52.54%
51.3Kb	48	40462-ID1351-ED1-S33-C7	PHAGE_Entero_DE3	NC_042057	50.43%
52.5Kb	55	40462-ID1351-ED1-S33-C8	PHAGE_Entero_cdtI	NC_009514	46.44%
40.3Kb	49	40462-ID1351-ED1-S33-C9:28231-68603	PHAGE_Salmon_SEN34	NC_028699	49.01%
44.9Kb	59	40462-ID1351-ED1-S33-C9:133643-178605	PHAGE_Escher_phiV10	NC_007804	48.61%
44.7Kb	45	40462-ID1351-ED1-S33-C15:42117-86819	PHAGE_Entero_PsP3	NC_005340	51.67%

## Sheet: phage K12 NEB DH5alpha
Region Length	Total Proteins	Region Position	Region Length	Total Proteins	Region Position	Most Common Phage	NCBI Reference Sequence	GC %
19.2Kb	24	1095131-1114399	19.2Kb	24	1095131-1114399	PHAGE_Shigel_SfIV	NC_022749	45.23%
28.4Kb	41	1207081-1235525	28.4Kb	24	1207081-1235525	PHAGE_Entero_phi80	NC_021190	51.69%
35Kb	42	1564739-1599799	35Kb	42	1564739-1599799	PHAGE_Salmon_118970_sal3	NC_031940	45.61%
